# Supplementary material for: Iodoperfluoroalkylation of unactivated alkenes via pyridine-boryl radical initiated atom-transfer radical addition
Source: Royal Society of Chemistry journal article supplement (doi:10.1039/d2ob00453d), 2022-01-01
Supplement: d2ob00453d1.pdf [file d2ob00453d1.pdf]

## Supporting Information

### **Iodoperfluoroalkylation of Unactivated Alkenes via Pyridine-Boryl Radical Initiated Atom-Transfer Radical Addition**

Jia Cao<sup>ab</sup>, Guoao Li<sup>a</sup>, Guoqiang Wang<sup>\*a</sup>, Liuzhou Gao<sup>a</sup>, and Shuhua Li<sup>\*a</sup>

<sup>a</sup>Key Laboratory of Mesoscopic Chemistry of Ministry of Education, Institute of Theoretical and Computational Chemistry, School of Chemistry and Chemical Engineering, Nanjing University, Nanjing 210093, P. R. China

<sup>b</sup>School of Chemistry and Chemical Engineering, Yan'an University, Yan'an 716000, P. R. China

Corresponding Author: shuhua@nju.edu.cn; wangguoqiang710@nju.edu.cn

---

## Table of Contents

|                                                                                             |            |
|---------------------------------------------------------------------------------------------|------------|
| <b>1. General Information .....</b>                                                         | <b>3</b>   |
| <b>2. Experimental Details for the iodoperfluoroalkylation of unactivated Alkenes .....</b> | <b>3</b>   |
| 2.1 Synthesis of alkenes.....                                                               | 3          |
| 2.2 Optimization Studies .....                                                              | 6          |
| 2.3 Experimental Studies on the Reaction Mechanism .....                                    | 7          |
| <b>3. Synthetic applicability.....</b>                                                      | <b>10</b>  |
| 3.1 Gram scale experiments .....                                                            | 10         |
| 3.2 Product transformations .....                                                           | 11         |
| <b>4. Spectroscopic Characterization of the Products .....</b>                              | <b>12</b>  |
| <b>5. Computational Investigations .....</b>                                                | <b>27</b>  |
| 5.1 Computational methods .....                                                             | 27         |
| 5.2 Computational mechanism studies on the reaction of 1c and CF <sub>3</sub> radical.....  | 29         |
| <b>6. NMR Spectra .....</b>                                                                 | <b>31</b>  |
| <b>7. Cartesian Coordinates of the Optimized Structures .....</b>                           | <b>91</b>  |
| <b>8. References .....</b>                                                                  | <b>110</b> |

## 1. General Information

All reactions were carried out with standard Schlenk techniques under argon. Bis(pinacolato)diboron ( $B_2pin_2$ ), bis(catecholato)diboron ( $B_2cat_2$ ), pyridines, perfluoroalkyl iodides and alkenes (**1a**, **1b**, **1d**, **5g-5l**) were purchased from commercial source and used without further purification. Commercial chemicals were purchased from Acros, Sigma-Aldrich, J&K, and Alfa Aesar Chemical Companies and used as received. Other alkenes were synthesized according to the reported procedure. Other Anhydrous  $CH_3CN$ ,  $CH_2Cl_2$ , methyl tert-butyl ether (MTBE) and THF were purchased from J&K and used as received (water < 30 ppm, J&KSeal). Analytical thin-layer chromatography (TLC) was performed on silica gel 60 F<sub>254</sub> aluminum sheets from Qingdao Haiyang Chemical Co., Ltd. Flash chromatography was performed on silica gel (200–300 mesh, Qingdao Haiyang Chemical Co., Ltd).

$^1H$ ,  $^{13}C$ ,  $^{11}B$  and  $^{19}F$  NMR spectra were recorded in  $CDCl_3$  on a Bruker AVANCE Avance III 400 instrument. Chemical shifts are reported in parts per million (ppm) and are referenced to the residual solvent resonance as the internal standard ( $CDCl_3$ : 7.26 ppm for  $^1H$  NMR, and 77.16 ppm for  $^{13}C\{^1H$  NMR). Data are reported as follows: chemical shift ( $\delta$  ppm), multiplicity (s = singlet, d = doublet, t = triplet, q = quartet, m = multiplet), coupling constants (Hz) and integration. Infrared spectra were recorded on a ThermoFisher Nicolet iS5 FTIR using a neat thin-film technique. High-resolution mass spectra (HRMS) were recorded on the Thermo Quest Finnigan LCQDECA system equipped with an ESI or APCI ionization source and a TOF detector mass spectrometer.

## 2. Experimental Details for the iodoperfluoroalkylation of unactivated Alkenes

### 2.1 Synthesis of alkenes

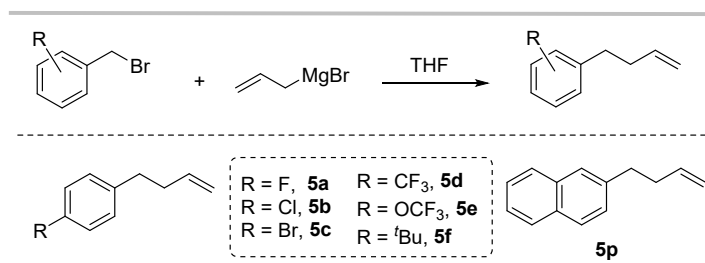

For preparation of alkenes (**5a-5f**, **5p**) according to the literature procedure,<sup>[1a]</sup> under argon atmosphere, benzyl bromide (1.0 equiv) and 20 mL anhydrous THF were added to a flame dried 100 mL round-bottom flash assembled with a constant pressure funnel which had been previously flame dried. Allylmagnesium bromide (2.0 equiv) in the constant pressure funnel were added dropwise. The

reaction was stirred for 8 h at room temperature and then quenched with saturated aqueous  $\text{NH}_4\text{Cl}$ . The aqueous layer was extracted with  $\text{CH}_2\text{Cl}_2$  and the combined organics were dried over  $\text{MgSO}_4$ , filtered through celite and concentrated under reduced pressure. The crude product was purified by flash chromatography, affording to the corresponding products.<sup>[1]</sup>

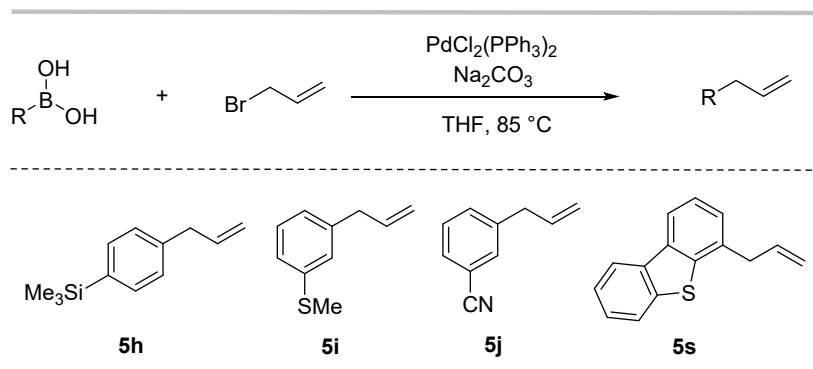

For the preparation of alkenes (**5h**, **5i**, **5j**, **5s**) according to the literature procedure,<sup>[2a]</sup> under argon atmosphere, to a solution of substituted boronic acid (1 equiv) and allyl halide (1.5 equiv) in THF (0.2 M) in a round bottom flask were added  $\text{PdCl}_2(\text{PPh}_3)_2$  (2.5 mol %). The reaction mixture was heated to 50 °C, then aq  $\text{Na}_2\text{CO}_3$  (1 M, 2 equiv) solution was added dropwise and then heating continued in reflux for 3-4 h. The reaction mixture was quenched with  $\text{H}_2\text{O}$  and extracted with  $\text{CH}_2\text{Cl}_2$ . The combined organic layer was washed with brine, dried over  $\text{MgSO}_4$ , and concentrated in vacuum. The residue was purified by silica gel chromatography (petroleum ether/ethyl acetate = 50:1) to afford the desired products.<sup>[2]</sup>

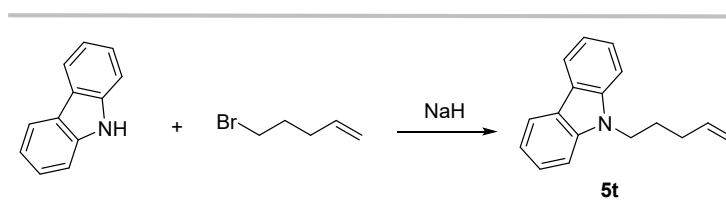

For the preparation of alkene **5t** according to the literature procedure:<sup>[3]</sup> A 100 mL round-bottom flask equipped with a Teflon-coated magnetic stirring bar was charged with 9H-carbazole (6.0 mmol) and 15 mL of DMF. Sodium hydride (6.0 mmol) was added and the reaction was stirred at room temperature for 1 h. 5-Bromo-1-pentene (9.0 mmol) was added, and the reaction was allowed to stir for an additional 2 h at 80 °C. Water was added and the mixture extracted with  $\text{CH}_2\text{Cl}_2$ . The organic layer was dried with anhydrous  $\text{Na}_2\text{SO}_4$  and concentrated in vacuo. The crude product was purified by flash chromatography with silica gel using a mixture of hexane/EtOAc (20:1) as an eluent to afford the desired compound (**5t**).

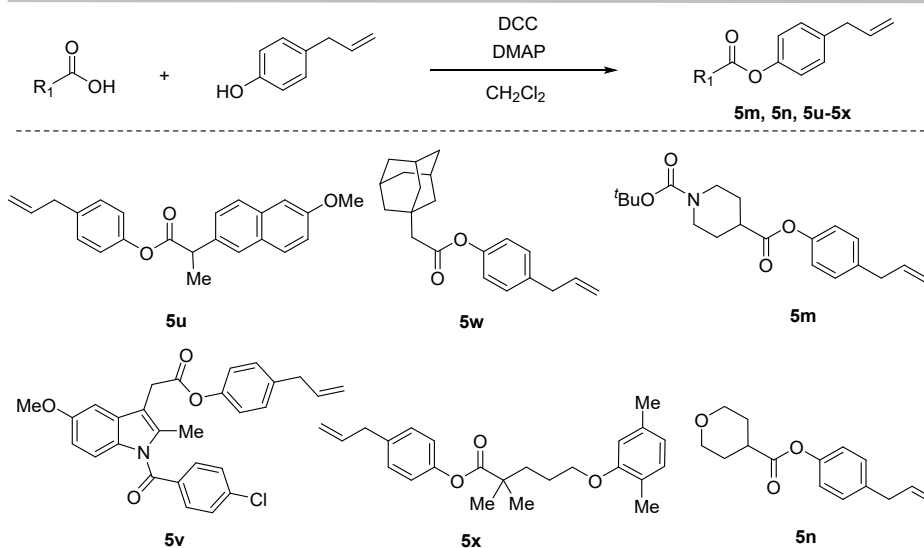

For preparation of alkenes **5m**, **5n**, **5u-5x**:<sup>[4]</sup> At first, a sealed reaction bottle charged with a magnetic stir bar, carboxylic acid (10.0 mmol, 1.0 equiv), DCC (dicyclohexylcarbodiimide) (12.0 mmol, 1.2 equiv), DMAP (4-dimethylaminepyridine) (1.5 mmol, 0.15 equiv) and 4-hydroxyacetophenone (12.0 mmol, 1.2 equiv) in CH<sub>2</sub>Cl<sub>2</sub> (20 mL). The reaction mixtures were stirred at room temperature for 24 h. Then it was filtered through a plug of silica gel (washed with EA/ethyl acetate). The filtrate was concentrated in vacuo and the residue was purified by chromatography on silica gel (PE/EA=50: 1~5:1) to afford the corresponding product.

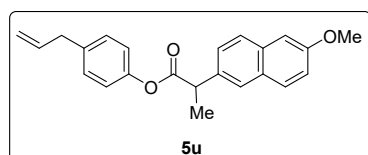

Characterization Data of 4-allylphenyl 2-(6-methoxynaphthalen-2-yl)propanoate (**5u**) as a white solid in 45% yield, mp 82-84 °C; **<sup>1</sup>H NMR** (400 MHz, CDCl<sub>3</sub>) δ 7.87 – 7.76 (m, 3H), 7.61 – 7.54 (m, 1H), 7.26 – 7.15 (m, 4H), 7.03 – 6.93 (m, 2H), 6.05 – 5.89 (m, 1H), 5.30 – 4.89 (m, 2H), 4.20 – 4.08 (m, 1H), 3.94 (s, 3H), 3.45 – 3.30 (m, 2H), 1.82 – 1.65 (m, 3H). **<sup>13</sup>C NMR** (101 MHz, CDCl<sub>3</sub>) δ 173.3, 157.7, 149.1, 137.5, 137.1, 135.2, 133.8, 129.4, 129.3, 129.0, 127.4, 126.1, 121.2, 119.1, 116.0, 116.0, 105.6, 55.2, 45.6, 39.5, 18.6. **IR** (film): 2976, 2935, 1749, 1634, 1504, 1263, 1163, 1130, 993, 850; **HRMS** (ESI) exact mass calculated for [M+H]<sup>+</sup>: 347.1642, measured: 347.1647.

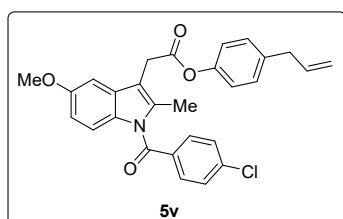

Characterization Data of 4-allylphenyl 2-(1-(4-chlorobenzoyl)-5-methoxy-2-methyl-1H-indol-3-yl)acetate (**5v**) as a white solid in 40% yield, mp 107-108 °C; **<sup>1</sup>H NMR** (400 MHz, CDCl<sub>3</sub>) δ 7.69 – 7.67 (m, 2H), 7.49 – 7.46 (m, 2H), 7.20 – 7.17 (m, 2H), 7.08 (d, *J* = 2.5 Hz, 1H), 7.01 – 6.98 (m, 2H), 6.92 (d, *J* = 9.0 Hz, 1H), 6.72 – 6.70 (m, 1H), 6.00 – 5.87 (m, 1H), 5.11 – 5.03 (m, 2H), 3.90 (s, 2H), 3.84 (s, 3H), 3.39 – 3.36 (m, 2H), 2.46 (s, 3H). **<sup>13</sup>C NMR** (101 MHz, CDCl<sub>3</sub>) δ 169.5, 168.4, 156.2, 149.0, 139.4, 137.8, 137.1, 136.2, 133.9, 131.3, 130.9, 130.6, 129.6, 129.2, 121.3, 116.1, 115.1, 112.2, 111.9, 101.3, 55.8, 39.6, 30.6, 13.5. **IR** (film): 3075, 2929, 2833, 1753,

1671, 1590, 1435, 1195, 1164, 1064, 1035, 924, 832; **HRMS** (ESI) exact mass calculated for  $[M+H]^+$ : 474.1467, measured: 474.1464.

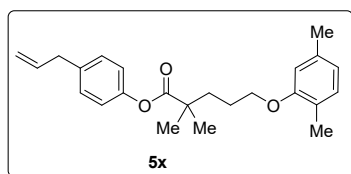

Characterization Data of 4-allylphenyl 5-(2,5-dimethylphenoxy)-2,2-dimethylpentanoate (**5x**) as a colorless oil in 38% yield; **<sup>1</sup>H NMR** (400 MHz, CDCl<sub>3</sub>) δ 7.25 (d, *J* = 8.4 Hz, 2H), 7.09 (d, *J* = 7.4 Hz, 1H), 7.06 – 7.03 (m, 2H), 6.75 (d, *J* = 7.4 Hz, 1H), 6.72 (d, *J* = 1.6 Hz, 1H), 6.08 – 5.97 (m, 1H), 5.19 – 5.14 (m, 2H), 4.07 – 4.03 (m, 2H), 3.47 – 3.44 (m, 2H), 2.40 (s, 3H), 2.28 (s, 3H), 1.98 – 1.94 (m, 4H), 1.46 (s, 6H). **<sup>13</sup>C NMR** (101 MHz, CDCl<sub>3</sub>) δ 176.4, 156.9, 149.3, 137.4, 137.2, 136.4, 130.4, 129.5, 123.6, 121.4, 120.8, 116.0, 111.9, 67.8, 42.4, 39.6, 37.2, 25.3, 25.2, 25.2, 21.4, 15.8. **IR** (film): 2923, 2873, 2117, 1748, 1506, 1472, 1263, 1163, 1045, 914, 802; **HRMS** (ESI) exact mass calculated for  $[M+H]^+$ : 367.2268, measured: 367.2269.

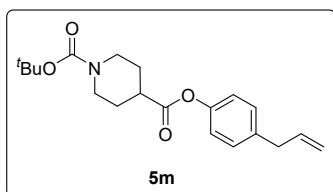

Characterization Data of 4-(4-allylphenyl) 1-(tert-butyl) piperidine-1,4-dicarboxylate (**5m**) as a colorless oil in 42% yield; **<sup>1</sup>H NMR** (400 MHz, CDCl<sub>3</sub>) δ 7.17 (d, *J* = 8.3 Hz, 2H), 6.98 – 6.95 (m, 2H), 5.98 – 5.86 (m, 1H), 5.09 – 5.02 (m, 2H), 4.11 – 4.02 (m, 2H), 3.36 (d, *J* = 6.7 Hz, 2H), 2.93 – 2.86 (m, 2H), 2.73 – 2.62 (m, 1H), 2.04 – 1.98 (m, 2H), 1.79 – 1.73 (m, 2H), 1.46 (s, 9H). **<sup>13</sup>C NMR** (101 MHz, CDCl<sub>3</sub>) δ 173.1, 154.6, 148.9, 137.6, 137.0, 129.5, 121.2, 116.0, 79.6, 42.6, 41.1, 39.5, 28.4, 27.9. **IR** (film): 2975, 2929, 1751, 1689, 1506, 1419, 1365, 1237, 1196, 1140, 1026, 915, 869; **HRMS** (ESI) exact mass calculated for  $[M+Na]^+$ : 368.1832, measured: 368.1837.

## 2.2 Optimization Studies

**General procedure.** Under argon atmosphere, a sealed reaction tube was charged with a magnetic stir bar, alkene (1.0 equiv, 0.2 mmol), perfluoroalkyl iodides (2.0 equiv, 0.4 mmol), B<sub>2</sub>pin<sub>2</sub> (0.04 mmol, 20 mol%), ethyl isonicotinate (0.04 mmol, 20 mol%) and MTBE (1 mL). The reaction mixture was stirred at 40 °C for 24 h. Then, the reaction mixture was concentrated under reduced pressure, and the resulting crude product was purified by preparative TLC on silica gel to afford the desired product. The results are tabulated in Table S1.

In the presence of catalytic amount of B<sub>2</sub>pin<sub>2</sub> (20 mol%) and ethyl isonicotinate (20 mol%), the reaction proceeded in tert-Butyl methyl ether (MTBE) at 40 °C and the desired product **3a** was obtained in 77% yield (Table S1, entry 1). When using 4-cyanopyridine as the initiator, the model reaction could furnish iodoperfluoroalkylation product **3a** at 40 °C in 61% (entry 2). Using the 0.1 and 0.1 equivalent of ethyl isonicotinate/B<sub>2</sub>pin<sub>2</sub> combination respectively, the corresponding product **3a** was formed in 72% yield (entry 3). The reaction was performed at elevated temperature of 60 °C and 80 °C, a good yields of **3a** were obtained (entry 4 and 5). Lowering the reaction temperature to room temperature led to a slightly diminished yield (entry 6). The reaction could be reacted well in the dark, and the corresponding iodoperfluoroalkylated product **3a** was also obtained in 78% yield, indicating

light have no effect on the reaction outcome (entry 7). The use of Ethyl acetate (EA) and PhCF<sub>3</sub> as the solvent shown good reactivity (entries 8 and 9). However, the product was also produced in reduced yield when performing the reactions in the hexane and CH<sub>3</sub>CN (entries 10 and 11). Further experiments revealed that the B<sub>2</sub>pin<sub>2</sub> and ethyl isonicotinate are essential for obtaining the target product (entries 12-14).

**Table S1.** optimization of reaction conditions.<sup>[a]</sup>

| entry | Variation from standard conditions                                         | Yield of <b>3a</b> <sup>[b]</sup> |
|-------|----------------------------------------------------------------------------|-----------------------------------|
| 1     | none                                                                       | 77%                               |
| 2     | 4-cyanopyridine instead of ethyl isonicotinate                             | 61%                               |
| 3     | ethyl isonicotinate (10 mol%), B <sub>2</sub> (pin) <sub>2</sub> (10 mol%) | 72%                               |
| 4     | 60 °C instead of 40 °C                                                     | 82%                               |
| 5     | 80 °C instead of 40 °C                                                     | 79%                               |
| 6     | rt                                                                         | 75%                               |
| 7     | rt, in the dark                                                            | 78%                               |
| 8     | EA instead of MTBE                                                         | 74%                               |
| 9     | PhCF <sub>3</sub> instead of MTBE                                          | 73%                               |
| 10    | hexane instead of PhCF <sub>3</sub>                                        | 61%                               |
| 11    | CH <sub>3</sub> CN instead of PhCF <sub>3</sub>                            | 55%                               |
| 12    | no ethyl isonicotinate                                                     | ND                                |
| 13    | no B <sub>2</sub> pin <sub>2</sub>                                         | ND                                |
| 14    | no ethyl isonicotinate and B <sub>2</sub> pin <sub>2</sub>                 | ND                                |

<sup>a</sup>Reaction conditions: **1** (0.2 mmol), **2** (0.4 mmol), B<sub>2</sub>(pin)<sub>2</sub> (20 mol%), ethyl isonicotinate (20 mol%), MTBE (1.0 mL), 24 h, 40 °C. <sup>b</sup>Isolated yield. ND = not detected. EA = Ethyl acetate, MTBE = tert-Butyl methyl ether, PhCF<sub>3</sub> = trifluorotoluene, rt = room temperature.

## 2.3 Experimental Studies on the Reaction Mechanism

### 2.3.1 Detect the reaction mixtures by GC-MS analysis

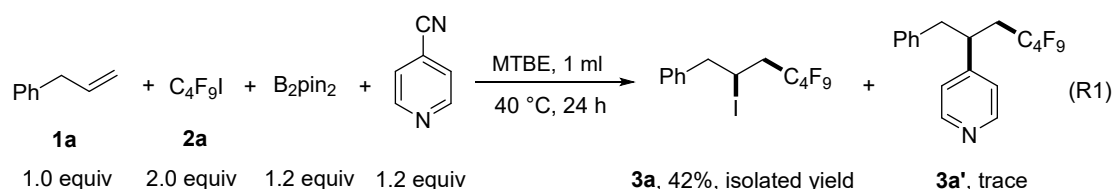





silica gel to give the product **3a** in 61% isolated yield. This results indicated the atom transfer radical addition pathway is favorable for alkyl-substituted alkenes.

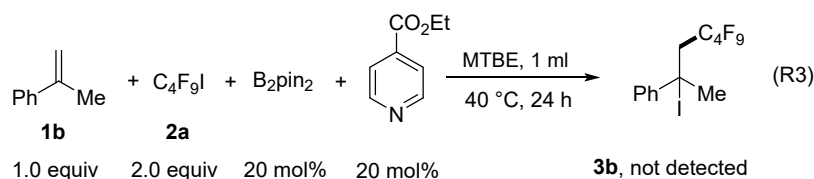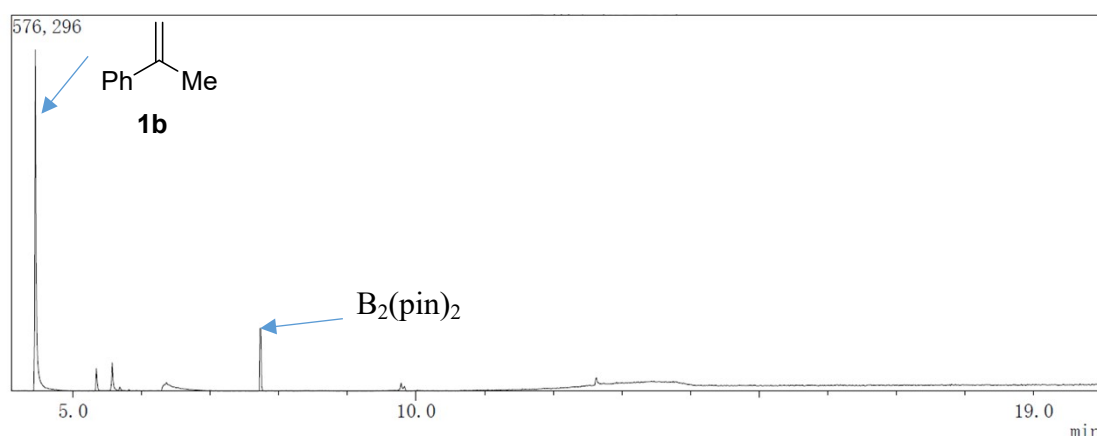

**Figure S3.** GC-MS analysis of the crude reaction mixture of reaction (R3)

The crude reaction mixture of  $\alpha$ -methylstyrene **1b** and  $\text{C}_4\text{F}_9\text{I}$  using 20 mol% ethyl isonicotinate and 20 mol%  $\text{B}_2\text{pin}_2$  under standard conditions was detected by GC-MS analysis (R3). As shown in Figure S3, the expected iodoperfluoroalkylation product **3b** was not detected by GC-MS analysis. The raw material **1b** was not transformed by GC-MS analysis. This results indicated the atom transfer radical addition pathway may be not suitable for aryl-substituted alkenes.

**Experimental procedure:** A sealed reaction tube charged with a magnetic stir bar, prepared by general procedure using allylbenzene **1a**,  $\alpha$ -methylstyrene **1b** or 1,1-Diphenylethylene (1.0 equiv, 0.2 mmol), ethyl isonicotinate or 4-CN pyridine,  $\text{B}_2\text{pin}_2$ , **2a** (0.4 mmol) and MTBE (1 mL) at 40 °C. After 24 h, the crude reaction mixture was detected by GC-MS analysis. The residue reaction mixture was concentrated under reduced pressure, and isolated with the preparative TLC on silica (PE/EA) to afford the corresponding product.

### 2.3.2 Radical clock experiments

We performed a radical-clock experiment using  $\alpha$ -cyclopropylstyrene **1c** as the substrate. After the generation of  $\text{C}_4\text{F}_9$  radical, which adds to the alkene at the terminal position, and simultaneously the resulting alkyl radical proceed *via* ring-opening isomerization to form the new alkyl radical. Finally, the new alkyl radical abstracts the indine atom of the other molecule  $\text{C}_4\text{F}_9\text{I}$  to give the corresponding product **4**.

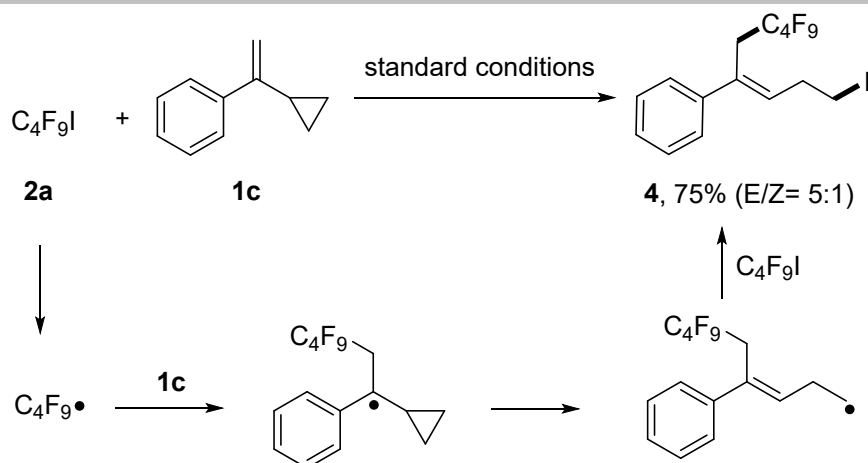

**Experimental procedure:** a sealed reaction tube charged with a magnetic stir bar, prepared following general procedure using **1c** (28.8 mg, 0.2 mmol, 1.0 equiv), ethyl isonicotinate (6.0  $\mu$ L, 0.04 mmol, 20 mol%),  $B_2pin_2$  (10.2 mg, 0.04 mmol, 20 mol%), **2a** (68.9  $\mu$ L, 0.4 mmol, 2.0 equiv) and MTBE (1 mL) at room temperature. After 24 h, the reaction mixture was isolated with preparative TLC on silica (PE/EA = 50:1) to afford the product **4** as colorless oil (73.5 mg, 75% yield of only *E* isomer). The *E/Z* (5: 1) ratio was determined by  $^1H$  NMR analysis of the crude mixture. The *E/Z* ratio was determined by  $^1H$  NMR at the vinylic proton of the product.<sup>[5]</sup>  **$^1H$  NMR** (400 MHz,  $CDCl_3$ )  $\delta$  7.39 – 7.27 (m, 5H), 5.98 (t,  $J = 7.3$  Hz, 1H), 3.38 – 3.24 (m, 4H), 2.84 (q,  $J = 7.0$  Hz, 2H).  **$^{13}C$  NMR** (101 MHz,  $CDCl_3$ )  $\delta$  142.1, 135.0, 130.8, 128.6, 127.7, 126.5, 120.7 – 112.2 (m, 4C,  $-C_4F_9$ ), 33.1, 31.5 (t,  $J_{C-F} = 22.1$  Hz), 4.1,  $^{13}C$ -NMR for  $C_4F_9$  could not be assigned.  **$^{19}F$  NMR** (376 MHz,  $CDCl_3$ )  $\delta$  -80.8 – -81.1 (m, 3F), -111.3 – -111.6 (m, 2F), -123.9 – -124.2 (m, 2F), -125.7 – -125.9 (m, 2F). **IR** (film): 3059, 3028, 2962, 1494, 1446, 1344, 1235, 1133, 1103, 1028, 879. **HRMS** (APCI) exact mass calculated for  $[M-I]^+$ : 369.0790, measured: 363.0782. Spectra are consistent with literature data.<sup>[8a]</sup>

### 3. Synthetic applicability

#### 3.1 Gram scale experiments

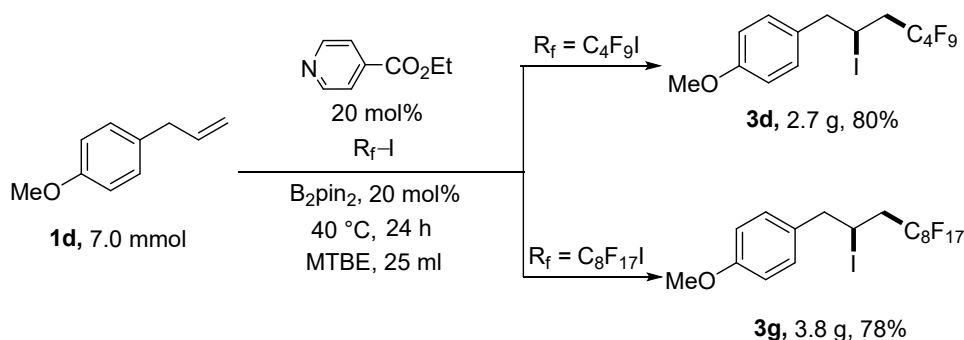

A sealed reaction tube charged with a magnetic stir bar, prepared following general procedure using **1d** (7.0 mmol, 1.0 equiv), ethyl isonicotinate (1.4 mmol, 20 mol%),  $B_2pin_2$  (1.4 mmol, 20 mol%),

perfluoroalkyl iodides (14.0 mmol, 2.0 equiv) and MTBE (15 mL) at 40 °C. After 24 h, the reaction mixture was isolated with by flash chromatography on silica (PE/EA = 50:1) to afford the product **3d** in 80% yield or **3g** in 78% yield.

### 3.2 Product transformations

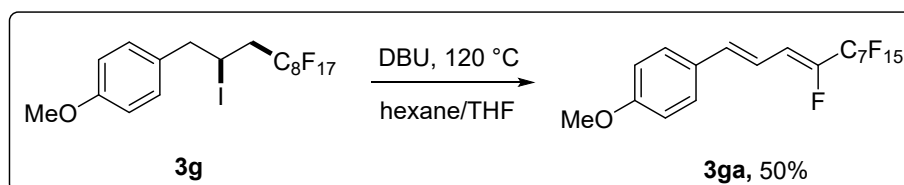

**Experimental procedure:** According to the literature procedure,<sup>[6]</sup> under argon atmosphere, a sealed reaction tube was charged with a magnetic stir bar, **3g** (0.2 mmol), 1,8-diazabicyclo[5.4.0]undec-7-ene (DBU, 0.6 mmol) and anhydrous *n*-hexane/THF (4:1, 1 mL) were added. The solution was stirred at 120 °C for 12 h. Then solvent was removed and the residue was purified by preparative TLC on silica gel (hexane/ethyl acetate = 50:1) to give product **3ga** as white solid in 50% yield. mp 77-78 °C; **<sup>1</sup>H NMR** (400 MHz, CDCl<sub>3</sub>) δ 7.44 – 7.39 (m, 2H), 6.92 – 6.88 (m, 2H), 6.88 – 6.72 (m, 2H), 6.33 – 6.19 (m, 1H), 3.83 (s, 3H). **<sup>19</sup>F NMR** (376 MHz, CDCl<sub>3</sub>) δ -80.1 – -81.8 (m, 3F), -116.2 – -118.1 (m, 2F), -118.8 – -125.2 (m, 8F), -125.6 – -127.0 (m, 2F), -131.1 – -132.8 (m, 1F). **<sup>13</sup>C NMR** (101 MHz, CDCl<sub>3</sub>) δ 160.6, 145.4 (t, *J* = 29.1 Hz), 142.8 (t, *J* = 29.1 Hz), 13.84 – 138.2 (m), 128.7, 115.8 – 115.5 (m), 114.9, 114.4, 120.5 – 109.7 (m, 7C, -C<sub>7</sub>F<sub>15</sub>), 55.4. **IR** (film): 3044, 2970, 2939, 2842, 1678, 1621, 1604, 1513, 1371, 1307, 1251, 1199, 1143, 1104, 1023, 969, 814, **HRMS** (ESI-TOF) exact mass calculated for [M]<sup>+</sup>: 546.0471, measured: 546.0461.

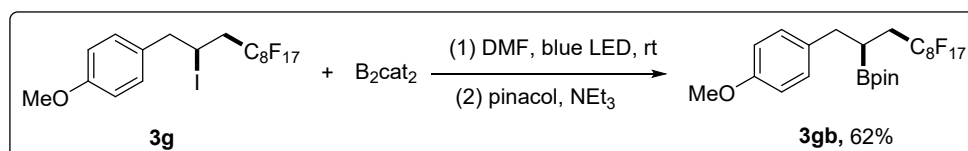

**Experimental procedure:** According to the literature procedure,<sup>[7]</sup> to a Schlenk tube were added the **3g** (0.2 mmol) and bis(catecholato)diboron (B<sub>2</sub>cat<sub>2</sub>), 0.8 mmol). The reaction vessel was evacuated and backfilled with Argon for three times. Dimethylformamide (0.6 mL) was added. The reaction mixture was stirred under blue LED irradiation at room temperature for 24 hours. A solution of pinacol (95 mg, 0.80 mmol) in triethylamine (0.7 mL) was added to the mixture. After 1 hour, water (15 mL) was added and the aqueous layer was extracted with ethyl acetate (3 x 15 mL). The combined organic layers were dried over magnesium sulfate, filtered and concentrated. The product was purified by preparative TLC on silica gel (hexane/ethyl acetate = 50:1) to give the corresponding product **3gb** in 62% yield.

**Experimental procedure for one-pot operation: (step 1)** A sealed reaction tube charged with a magnetic stir bar, prepared following general procedure using **1d** (0.2 mmol, 1.0 equiv), ethyl

isonicotinate (20 mol%), B<sub>2</sub>pin<sub>2</sub> (20 mol%), perfluoroalkyl iodides (2.0 equiv) and MTBE (1 mL) at 40 °C. After 24 h, the reaction mixture cooling to room temperature. The crude reaction solution was concentrated under reduced pressure, which was applied to the next step reaction. **(step 2)** To a schlenk tube was added the resulting crude reaction mixture of step 1, and bis(catecholato)diboron (B<sub>2</sub>cat<sub>2</sub>, 0.8 mmol). The reaction vessel was evacuated and backfilled with argon for three times. Dimethylformamide (0.6 mL) was added. The reaction mixture was stirred under blue LED irradiation at room temperature for 24 hours. A solution of pinacol (95 mg, 0.80 mmol) in triethylamine (0.7 mL) was added to the mixture. After 1 hour, water (15 mL) was added and the aqueous layer was extracted with ethyl acetate (3 x 15 mL). The combined organic layers were dried over magnesium sulfate, filtered and concentrated. The product was purified by preparative TLC on silica gel (hexane/ethyl acetate = 50:1) to give the corresponding product **3gb** in 57% yield.

**3gb**: Colorless viscous oil; <sup>1</sup>H NMR (400 MHz, CDCl<sub>3</sub>) δ 7.15 – 7.10 (m, 2H), 6.86 – 6.78 (m, 2H), 3.77 (s, 3H), 2.81 – 2.73 (m, 1H), 2.69 – 2.60 (m, 1H), 2.33 – 1.99 (m, 2H), 1.79 – 1.69 (m, 1H), 1.18 (s, 6H), 1.12 (s, 6H). <sup>13</sup>C NMR (101 MHz, CDCl<sub>3</sub>) δ 158.3, 132.2, 129.9, 113.9, 122.4 – 106.3 (m, 4C, -C<sub>4</sub>F<sub>9</sub>), 83.7, 55.3, 36.0, 31.8 (t, J<sub>C-F</sub> = 21.8 Hz), 24.8, 17.7, <sup>13</sup>C-NMR for C<sub>4</sub>F<sub>9</sub> could not be assigned. <sup>19</sup>F NMR (376 MHz, CDCl<sub>3</sub>) δ -80.8 – -81.1 (m, 3F), -111.1 – -113.6 (m, 2F), -121.71 – -122.10 (m, 6F), -122.7 – -122.9 (m, 2F), -123.6 – -123.8 (m, 2F), -126.2 – -126.4 (m, 2F). <sup>11</sup>B NMR (128 MHz, CDCl<sub>3</sub>) δ 31.6. IR (film): 2982, 2937, 2839, 1613, 1548, 1514, 1468, 1390, 1331, 1245, 1209, 1145, 1114, 1039, 966, 863. HRMS (ESI-TOF) exact mass calculated for [M]<sup>+</sup>: 694.1542, measured: 694.1527.

#### 4. Spectroscopic Characterization of the Products

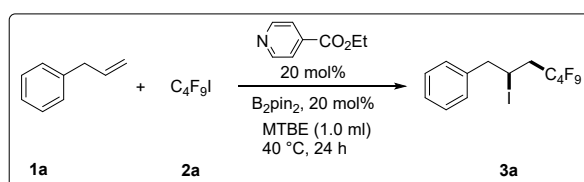

**3a**: Prepared following *general procedure* using **1a** (26.5 μL, 0.2 mmol, 1.0 equiv), ethyl isonicotinate (6.0 μL, 0.04 mmol, 20 mol%), B<sub>2</sub>pin<sub>2</sub> (10.2 mg, 0.04 mmol, 20 mol%), **2a** (68.9 μL, 0.4 mmol, 2.0 equiv) and MTBE (1 mL) at 40 °C. After 24 h, the reaction mixture was isolated with preparative TLC on silica (PE/EA = 50:1) to afford the product **3a** as colorless oil (71.5 mg, 77% yield). <sup>1</sup>H NMR (400 MHz, CDCl<sub>3</sub>) δ 7.41 – 7.27 (m, 3H), 7.24 – 7.18 (m, 2H), 4.52 – 4.43 (m, 1H), 3.34 – 3.20 (m, 2H), 2.98 – 2.83 (m, 2H). <sup>13</sup>C NMR (101 MHz, CDCl<sub>3</sub>) δ 138.7, 129.1, 128.8, 127.5, 122.0 – 113.9 (m, 3C, -C<sub>3</sub>F<sub>7</sub>), 47.2, 40.8 (t, J<sub>C-F</sub> = 20.9 Hz), 19.4, <sup>13</sup>C-NMR for C<sub>4</sub>F<sub>9</sub> could not be assigned. <sup>19</sup>F NMR (376 MHz, CDCl<sub>3</sub>) δ -80.9 – -81.1 (m, 3F), -111.9 – -114.4 (m, 2F), -124.4 – -124.6 (m, 2F), -125.8 – -125.9 (m, 2F). IR (film): 3031, 2927, 1603, 1497, 1349, 1221, 1134, 1019, 728. HRMS (APCI) exact mass calculated for [M]<sup>+</sup>: 337.0633, measured: 337.0625. Spectra are consistent with literature data.<sup>[8b]</sup>

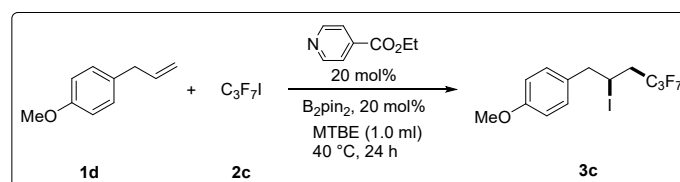

**3c:** Prepared following *general procedure* using **1d** (30.7  $\mu$ L, 0.2 mmol, 1.0 equiv), ethyl isonicotinate (6.0  $\mu$ L, 0.04 mmol, 20 mol%),  $B_2pin_2$  (10.2 mg, 0.04 mmol, 20 mol%), **2c** (68.9  $\mu$ L, 0.4 mmol, 2.0 equiv) and MTBE (1 mL) at 40  $^{\circ}$ C. After 24 h, the reaction mixture was isolated with preparative TLC on silica (PE/EA = 50:1) to afford the product **3c** as colorless oil (71.0 mg, 80% yield).  **$^1H$  NMR** (400 MHz,  $CDCl_3$ )  $\delta$  7.15 – 7.09 (m, 2H), 6.91 – 6.84 (m, 2H), 4.47 – 4.38 (m, 1H), 3.82 (s, 3H), 3.25 – 3.12 (m, 2H), 2.94 – 2.80 (m, 2H).  **$^{13}C$  NMR** (101 MHz,  $CDCl_3$ )  $\delta$  158.9, 130.7, 130.1, 120.4 – 112.6 (m, 3C, -C<sub>3</sub>F<sub>7</sub>), 114.1, 55.3, 46.3, 40.4 (t,  $J_{C-F}$  = 20.8 Hz), 20.2,  $^{13}C$ -NMR for C<sub>3</sub>F<sub>7</sub> could not be assigned.  **$^{19}F$  NMR** (376 MHz,  $CDCl_3$ )  $\delta$  -80.3 – -180.4 (m, 3F), -112.6 – -115.0 (m, 2F), -127.7 – -127.9 (m, 2F). **IR** (film): 3002, 2921, 2838, 1612, 1513, 1353, 1250, 1226, 1178, 732. **HRMS** (ESI-TOF) exact mass calculated for [M-I]<sup>+</sup>: 317.0771, measured: 317.0762.

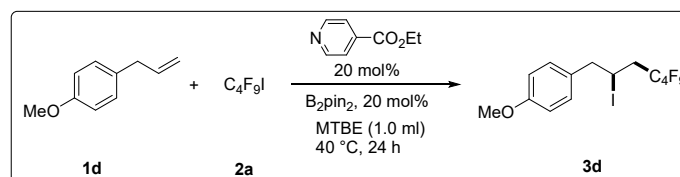

**3d:** Prepared following *general procedure* using **1d** (30.7  $\mu$ L, 0.2 mmol, 1.0 equiv), ethyl isonicotinate (6.0  $\mu$ L, 0.04 mmol, 20 mol%),  $B_2pin_2$  (10.2 mg, 0.04 mmol, 20 mol%), **2a** (68.9  $\mu$ L, 0.4 mmol, 2.0 equiv) and MTBE (1 mL) at 40  $^{\circ}$ C. After 24 h, the reaction mixture was isolated with preparative TLC on silica (PE/EA = 50:1) to afford the product **3d** as colorless oil (77.1 mg, 78% yield).  **$^1H$  NMR** (400 MHz,  $CDCl_3$ ) 7.16 – 7.07 (m, 2H), 6.93 – 6.85 (m, 2H), 4.46 – 4.38 (m, 1H), 3.81 (s, 3H), 3.25 – 3.13 (m, 2H), 2.94 – 2.81 (m, 2H).  **$^{13}C$  NMR** (101 MHz,  $CDCl_3$ )  $\delta$  158.9, 130.8, 130.1, 121.0 – 109.2 (m, 4C, -C<sub>4</sub>F<sub>9</sub>), 114.1, 55.3, 46.3, 40.6 (t,  $J_{C-F}$  = 20.9 Hz), 20.2,  $^{13}C$ -NMR for C<sub>4</sub>F<sub>9</sub> could not be assigned.  **$^{19}F$  NMR** (376 MHz,  $CDCl_3$ )  $\delta$  -80.7 – -81.6 (m, 3F), -111.9 – -114.3 (m, 2F), -124.4 – -124.7 (m, 2F), -125.8 – -126.0 (m, 2F). **IR** (film): 3003, 2956, 2937, 1613, 1514, 1301, 1320, 1133, 736. **HRMS** (ESI-TOF) exact mass calculated for [M-I]<sup>+</sup>: 367.0739, measured: 367.0738. Spectra are consistent with literature data.<sup>[8b]</sup>

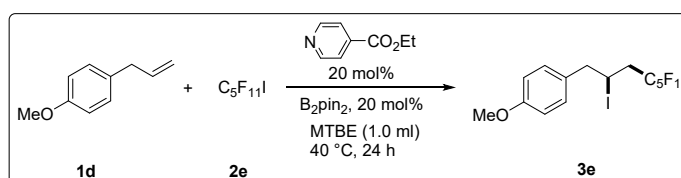

**3e**: Prepared following *general procedure* using **1d** (30.7  $\mu$ L, 0.2 mmol, 1.0 equiv), ethyl isonicotinate (6.0  $\mu$ L, 0.04 mmol, 20 mol%),  $B_2pin_2$  (10.2 mg, 0.04 mmol, 20 mol%), **2e** (76.5  $\mu$ L, 0.4 mmol, 2.0 equiv) and MTBE (1 mL) at 40  $^{\circ}$ C. After 24 h, the reaction mixture was isolated with preparative TLC on silica (PE/EA = 50:1) to afford the product **3e** as colorless oil (89.2 mg, 82% yield).  **$^1H$  NMR** (400 MHz,  $CDCl_3$ )  $\delta$  7.17 – 7.09 (m, 2H), 6.94 – 6.81 (m, 2H), 4.47 – 4.38 (m, 1H), 3.82 (s, 3H), 3.26 – 3.12 (m, 2H), 2.96 – 2.80 (m, 2H).  **$^{19}F$  NMR** (376 MHz,  $CDCl_3$ ) -80.8 – -81.04 (m, 3F), -111.6 – -114.2 (m, 2F), -122.4 – -122.8 (m, 2F), -123.7 – -123.9 (m, 2F), -126.2 – -126.4 (m, 2F).  **$^{13}C$  NMR** (101 MHz,  $CDCl_3$ )  $\delta$  158.9, 130.8, 130.1, 122.0 – 107.2 (m, 5C,  $-C_5F_{11}$ ), 114.1, 55.3, 46.3, 40.7 (t,  $J_{C-F}$  = 20.9 Hz), 20.3,  $^{13}C$ -NMR for  $C_5F_{11}$  could not be assigned. **IR** (film): 3003, 2936, 2838, 1613, 1514, 1240, 1140, 1112, 871. **HRMS** (ESI-TOF) exact mass calculated for  $[M-Na]^+$ : 566.9649, measured: 566.9646. Spectra are consistent with literature data.<sup>[9b]</sup>

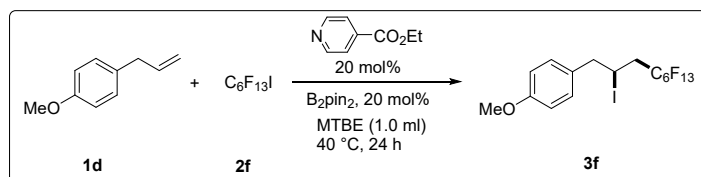

**3f**: Prepared following *general procedure* using **1d** (30.7  $\mu$ L, 0.2 mmol, 1.0 equiv), ethyl isonicotinate (6.0  $\mu$ L, 0.04 mmol, 20 mol%),  $B_2pin_2$  (10.2 mg, 0.04 mmol, 20 mol%), **2f** (86.5  $\mu$ L, 0.4 mmol, 2.0 equiv) and MTBE (1 mL) at 40  $^{\circ}$ C. After 24 h, the reaction mixture was isolated with preparative TLC on silica (PE/EA = 50:1) to afford the product **3f** as colorless oil (99.8 mg, 84% yield).  **$^1H$  NMR** (400 MHz,  $CDCl_3$ )  $\delta$  7.16 – 7.10 (m, 2H), 6.93 – 6.82 (m, 2H), 4.47 – 4.38 (m, 1H), 3.81 (s, 3H), 3.25 – 3.11 (m, 2H), 2.95 – 2.77 (m, 2H).  **$^{13}C$  NMR** (101 MHz,  $CDCl_3$ )  $\delta$  158.9, 130.8, 130.1, 122.2 – 105.3 (m, 6C,  $-C_6F_{13}$ ), 114.1, 55.3, 46.3, 40.7 (t,  $J_{C-F}$  = 20.9 Hz), 20.3,  $^{13}C$ -NMR for  $C_6F_{13}$  could not be assigned.  **$^{19}F$  NMR** (376 MHz,  $CDCl_3$ )  $\delta$  -80.6 – -81.5 (m, 3F), -111.7 – -114.0 (m, 2F), -121.7 – -121.9 (m, 2F), -122.7 – -123.0 (m, 2F), -123.6 – -123.7 (m, 2F), -126.1 – -126.4 (m, 2F). **IR** (film): 3002, 2958, 2838, 1613, 1301, 1248, 1114, 810. **HRMS** (ESI-TOF) exact mass calculated for  $[M-I]^+$ : 467.0675, measured: 467.0677. Spectra are consistent with literature data.<sup>[9a]</sup>

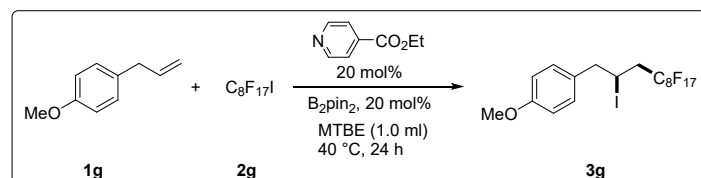

**3g**: Prepared following *general procedure* using **1d** (30.7  $\mu$ L, 0.2 mmol, 1.0 equiv), ethyl isonicotinate (6.0  $\mu$ L, 0.04 mmol, 20 mol%),  $B_2pin_2$  (10.2 mg, 0.04 mmol, 20 mol%), **2g** (105.7  $\mu$ L, 0.4 mmol, 2.0 equiv) and MTBE (1 mL) at 40  $^{\circ}$ C. After 24 h, the reaction mixture was isolated with preparative TLC on silica (PE/EA = 50:1) to afford the product **3g** as white solid (119.4 mg, 86% yield).

mp 50-52 °C; **<sup>1</sup>H NMR** (400 MHz, CDCl<sub>3</sub>) δ 7.16 – 7.10 (m, 2H), 6.93 – 6.85 (m, 2H), 4.47 – 4.39 (m, 1H), 3.81 (s, 3H), 3.26 – 3.12 (m, 2H), 2.96 – 2.80 (m, 2H). **<sup>13</sup>C NMR** (101 MHz, CDCl<sub>3</sub>) δ 159.0, 130.8, 130.2, 121.5 – 107.1 (m, 8C, -C<sub>8</sub>F<sub>17</sub>), 114.1, 55.3, 46.3, 40.8 (t, *J*<sub>C-F</sub> = 20.8 Hz), 20.4, <sup>13</sup>C-NMR for C<sub>8</sub>F<sub>17</sub> could not be assigned. **<sup>19</sup>F NMR** (376 MHz, CDCl<sub>3</sub>) δ -80.8 – -81.2 (m, 3F), -111.70– -114.1 (m, 2F), -121.5 – -121.7 (m, 2F), -121.8 – -122.2 (m, 4F), -122.7 – -123.0 (m, 2F), -123.6 – -123.7 (m, 2F), -126.2 – -126.5 (m, 2F). **IR** (film): 3003, 2937, 2838, 1613, 1513, 1247, 1115, 1037, 807. **HRMS** (ESI-TOF) exact mass calculated for [M-I]<sup>+</sup>: 567.0611, measured: 567.0612. Spectra are consistent with literature data.<sup>[9b]</sup>

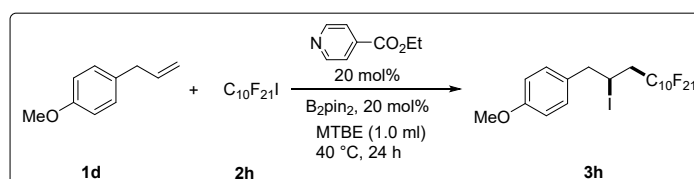

**3h**: Prepared following *general procedure* using **1d** (30.7 μL, 0.2 mmol, 1.0 equiv), ethyl isonicotinate (6.0 μL, 0.04 mmol, 20 mol%), B<sub>2</sub>pin<sub>2</sub> (10.2 mg, 0.04 mmol, 20 mol%), **2h** (258.4 mg, 0.4 mmol, 2.0 equiv) and MTBE (1 mL) at 40 °C. After 24 h, the reaction mixture was isolated with preparative TLC on silica (PE/EA = 50:1) to afford the product **3h** as white solid (112.7 mg, 71% yield). mp 73-75 °C; **<sup>1</sup>H NMR** (400 MHz, CDCl<sub>3</sub>) δ 7.14 – 7.09 (m, 2H), 6.91 – 6.82 (m, 2H), 4.45 – 4.38 (m, 1H), 3.81 (s, 3H), 3.26 – 3.11 (m, 2H), 2.97 – 2.78 (m, 2H). **<sup>13</sup>C NMR** (101 MHz, CDCl<sub>3</sub>) δ 158.9, 130.8, 130.1, 121.7 – 107.1 (m, 10C, -C<sub>10</sub>F<sub>21</sub>), 118.3, 118.0, 115.8, 115.4, 114.1, 55.3, 46.3, δ 40.79 (t, *J*<sub>C-F</sub> = 20.8 Hz), 20.4, <sup>13</sup>C-NMR for C<sub>4</sub>F<sub>9</sub> could not be assigned. **<sup>19</sup>F NMR** (376 MHz, CDCl<sub>3</sub>) δ -80.8 – -81.2 (3m, F), -111.72 – -114.17 (m, 2F), -121.5 – -122.3 (m, 10F), -122.7 – -123.0 (m, 2F), -123.5 – -123.8 (m, 2F), -126.1 – -126.4 (m, 2F). **IR** (film): 2936, 2839, 1613, 1514, 1210, 1150, 741. **HRMS** (ESI-TOF) exact mass calculated for [M-I]<sup>+</sup>: 667.0547, measured: 667.0544.

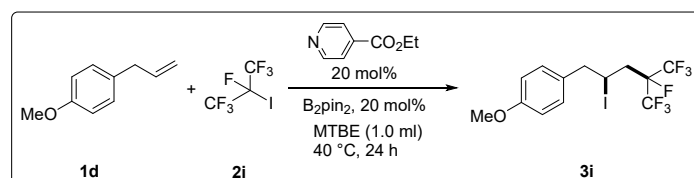

**3i**: Prepared following *general procedure* using **1d** (30.7 μL, 0.2 mmol, 1.0 equiv), ethyl isonicotinate (6.0 μL, 0.04 mmol, 20 mol%), B<sub>2</sub>pin<sub>2</sub> (10.2 mg, 0.04 mmol, 20 mol%), **2i** (118.4 mg, 0.4 mmol, 2.0 equiv) and MTBE (1 mL) at 40 °C. After 24 h, the reaction mixture was isolated with preparative TLC on silica (PE/EA = 50:1) to afford the product **3i** as colorless oil (71.0 mg, 80% yield). **<sup>1</sup>H NMR** (400 MHz, CDCl<sub>3</sub>) δ 7.14 – 7.09 (m, 2H), 6.94 – 6.83 (m, 2H), 4.46 – 4.37 (m, 1H), 3.81 (s, 3H), 3.25 – 3.17 (m, 1H), 3.14 – 3.06 (m, 1H), 3.00 – 2.86 (m, 2H). **<sup>13</sup>C NMR** (101 MHz, CDCl<sub>3</sub>) δ 158.9, 130.9, 13.14, 125.5 – 126.0 (m, 1C, -CF), 114.0, 93.6 – 90.3 (m, 2C, -2CF<sub>3</sub>), 55.3, 46.7, 38.8 (d, *J*<sub>C-F</sub> =

18.5 Hz), 22.7.  $^{13}\text{C}$ -NMR for  $\text{CF}_3$  and  $\text{CF}$  could not be assigned.  $^{19}\text{F}$  NMR (376 MHz,  $\text{CDCl}_3$ )  $\delta$  -75.4 – -76.6 (m, 3F), -76.7 – -78.1 (m, 3F), -185.0 – -185.6 (m, 1F). IR (film): 3001, 2935, 2838, 1613, 1514, 1301, 1222, 1611, 807. HRMS (ESI-TOF) exact mass calculated for  $[\text{M-I}]^+$ : 317.0771, measured: 317.0772. Spectra are consistent with literature data.<sup>[9c]</sup>

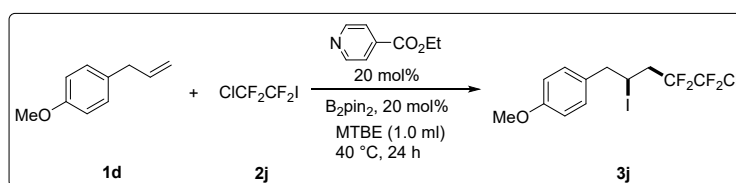

**3j**: Prepared following *general procedure* using **1d** (30.7  $\mu\text{L}$ , 0.2 mmol, 1.0 equiv), ethyl isonicotinate (6.0  $\mu\text{L}$ , 0.04 mmol, 20 mol%),  $\text{B}_2\text{pin}_2$  (10.2 mg, 0.04 mmol, 20 mol%), **2j** (105.0 mg, 0.4 mmol, 2.0 equiv) and MTBE (1 mL) at 40 °C. After 24 h, the reaction mixture was isolated with preparative TLC on silica (PE/EA = 50:1) to afford the product **3j** as colorless oil (61.5 mg, 75% yield).  $^1\text{H}$  NMR (400 MHz,  $\text{CDCl}_3$ ) 7.16 – 7.11 (m, 2H), 6.92 – 6.84 (m, 2H), 4.47 – 4.38 (m, 1H), 3.81 (s, 3H), 3.26 – 3.12 (m, 2H), 2.95 – 2.82 (m, 2H).  $^{13}\text{C}$  NMR (101 MHz,  $\text{CDCl}_3$ )  $\delta$  158.9, 130.8, 130.2, 124.7 – 115.3 (m, 2C,  $-\text{CF}_2\text{CF}_2$ ), 114.0, 55.3, 46.2, 40.5 (t,  $J_{\text{C-F}} = 21.1$  Hz), 21.1,  $^{13}\text{C}$ -NMR for  $\text{CF}_2\text{CF}_2$  could not be assigned.  $^{19}\text{F}$  NMR (376 MHz,  $\text{CDCl}_3$ )  $\delta$  -71.5 – -71.6 (m, 2F), -111.29 – -113.89 (m, 2F). IR (film): 2962, 2837, 1688, 1620, 1614, 1259, 1086, 1032, 802. HRMS (ESI-TOF) exact mass calculated for  $[\text{M-Na}]^+$ : 432.9450, measured: 432.9446.

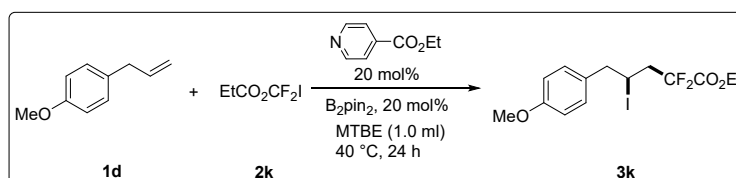

**3k**: Prepared following *general procedure* using **1d** (30.7  $\mu\text{L}$ , 0.2 mmol, 1.0 equiv), ethyl isonicotinate (6.0  $\mu\text{L}$ , 0.04 mmol, 20 mol%),  $\text{B}_2\text{pin}_2$  (10.2 mg, 0.04 mmol, 20 mol%), **2k** (81.2 mg, 0.4 mmol, 2.0 equiv) and MTBE (1 mL) at 40 °C. After 24 h, the reaction mixture was isolated with preparative TLC on silica (PE/EA = 20:1) to afford the product **3k** as colorless oil (63.7 mg, 80% yield).  $^1\text{H}$  NMR (400 MHz,  $\text{CDCl}_3$ )  $\delta$  7.13 – 7.09 (m, 2H), 6.90 – 6.82 (m, 2H), 4.36 – 4.28 (m, 2H), 3.80 (s, 3H), 3.19 – 3.12 (m, 2H), 2.92 – 2.74 (m, 2H), 1.36 (t,  $J = 7.2$  Hz, 3H).  $^{13}\text{C}$  NMR (101 MHz,  $\text{CDCl}_3$ )  $\delta$  163.5 (t,  $J_{\text{C-F}} = 32.3$  Hz), 158.8, 131.0, 130.1, 115.3 (t,  $J_{\text{C-F}} = 252.4$  Hz,  $\text{CF}_2$ ), 114.0, 63.3, 55.3, 46.5, 44.2 (t,  $J_{\text{C-F}} = 23.4$  Hz), 22.8, 14.0.  $^{19}\text{F}$  NMR (376 MHz,  $\text{CDCl}_3$ )  $\delta$  -101.3 – -101.2 (m, 2F), -105.9 – -106.7 (m, 2F). IR (film): 2936, 2838, 1769, 1613, 1515, 1455, 1338, 1248, 1177, 1080, 838. HRMS (ESI-TOF) exact mass calculated for  $[\text{M-Na}]^+$ : 421.0083, measured: 421.0084. Spectra are consistent with literature data.<sup>[9a]</sup>



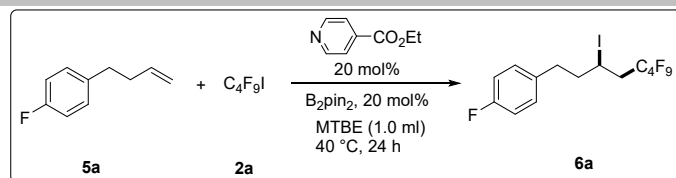

**6a:** Prepared following *general procedure* using **5a** (30.0 mg, 0.2 mmol, 1.0 equiv), ethyl isonicotinate (6.0  $\mu$ L, 0.04 mmol, 20 mol%),  $B_2pin_2$  (10.2 mg, 0.04 mmol, 20 mol%), **2a** (68.9  $\mu$ L, 0.4 mmol, 2.0 equiv) and MTBE (1 mL) at 40 °C. After 24 h, the reaction mixture was isolated with preparative TLC on silica (PE/EA = 20:1) to afford the product **6a** as colorless oil (79.4 mg, 80% yield).  **$^1H$  NMR** (400 MHz,  $CDCl_3$ ). 7.21 – 7.16 (m, 2H), 7.05 – 6.94 (m, 2H), 4.28 – 4.21 (m, 1H), 3.00 – 2.88 (m, 2H), 2.85 – 2.65 (m, 2H), 2.15 – 2.06 (m, 2H).  **$^{13}C$  NMR** (101 MHz,  $CDCl_3$ )  $\delta$  161.7 (d,  $J_{C-F}$  = 244.3 Hz), 135.6 (d,  $J_{C-F}$  = 3.2 Hz), 130.0 (d,  $J_{C-F}$  = 7.9 Hz), 122.2 – 105.0 (m, 4C, -  $C_4F_9$ ), 115.5 (d,  $J_{C-F}$  = 21.3 Hz), 41.9, 41.8 (t,  $J_{C-F}$  = 20.9 Hz), 35.0, 19.9,  $^{13}C$ -NMR for  $C_4F_9$  could not be assigned.  **$^{19}F$  NMR** (376 MHz,  $CDCl_3$ )  $\delta$  -81.1 – -81.1 (m, 3F), -111.8 – -114.5 (m, 2F), -116.7 – -116.8 (m, 1F), -124.5 – -124.7 (m, 2F), -125.9 – -126.0 (m, 2F). **IR** (film): 3040, 2917, 2858, 1888, 1601, 1510, 1493, 1351, 1221, 1134, 1093, 880. **HRMS** (APCI) exact mass calculated for  $[M-I]^+$ : 369.0696, measured: 369.0692.

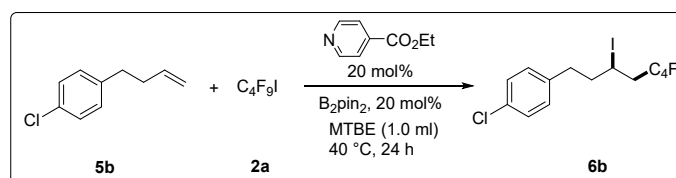

**6b:** Prepared following *general procedure* using **5b** (33.2 mg, 0.2 mmol, 1.0 equiv), ethyl isonicotinate (6.0  $\mu$ L, 0.04 mmol, 20 mol%),  $B_2pin_2$  (10.2 mg, 0.04 mmol, 20 mol%), **2a** (68.9  $\mu$ L, 0.4 mmol, 2.0 equiv) and MTBE (1 mL) at 40 °C. After 24 h, the reaction mixture was isolated with preparative TLC on silica (PE/EA = 50:1) to afford the product **6b** as colorless oil (82.9 mg, 81% yield).  **$^1H$  NMR** (400 MHz,  $CDCl_3$ ).  **$^{13}C$  NMR** (101 MHz,  $CDCl_3$ )  $\delta$  138.4, 132.3, 129.9, 128.9, 122.8 – 105.4 (m, 4C, -  $C_4F_9$ ), 41.7 (t,  $J_{C-F}$  = 20.8 Hz), 41.6, 41.5, 35.2, 19.8.  $^{13}C$ -NMR for  $C_4F_9$  could not be assigned.  **$^{19}F$  NMR** (376 MHz,  $CDCl_3$ )  $\delta$  7.31 – 7.25 (m, 2H), 7.17 – 7.13 (m, 2H), 4.28 – 4.19 (m, 1H), 2.99 – 2.71 (m, 4H), 2.17 – 2.01 (m, 2H). **IR** (film): 3028, 2927, 2857, 1895, 1598, 1493, 1351, 1234, 1134, 1093, 1016, 818. **HRMS** (APCI) exact mass calculated for  $[M-I]^+$ : 385.0400, measured: 385.0396.

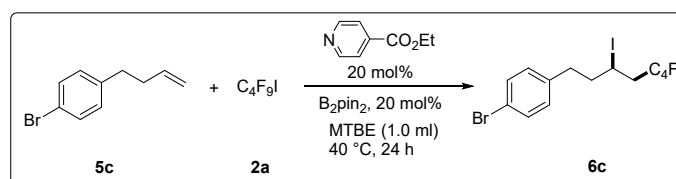

**6c:** Prepared following *general procedure* using **5c** (42.0 mg, 0.2 mmol, 1.0 equiv), ethyl isonicotinate (6.0  $\mu$ L, 0.04 mmol, 20 mol%),  $B_2pin_2$  (10.2 mg, 0.04 mmol, 20 mol%), **2a** (68.9  $\mu$ L, 0.4

mmol, 2.0 equiv) and MTBE (1 mL) at 40 °C. After 24 h, the reaction mixture was isolated with preparative TLC on silica (PE/EA = 50:1) to afford the product **6c** as colorless oil (93.4 mg, 84% yield). **<sup>1</sup>H NMR** (400 MHz, CDCl<sub>3</sub>) δ 7.46 – 7.40 (m, 2H), 7.11 – 7.08 (m, 2H), 4.28 – 4.19 (m, 1H), 2.98 – 2.69 (m, 4H), 2.19 – 1.99 (m, 2H). **<sup>13</sup>C NMR** (101 MHz, CDCl<sub>3</sub>) δ 138.9, 131.8, 130.3, 120.3, 119.6 – 108.1 (m, 4C, - C<sub>4</sub>F<sub>9</sub>), 41.6 (d, *J*<sub>C-F</sub> = 20.0 Hz), 41.5, 35.2, 19.8, <sup>13</sup>C-NMR for C<sub>4</sub>F<sub>9</sub> could not be assigned. **<sup>19</sup>F NMR** (376 MHz, CDCl<sub>3</sub>) δ. -81.9 – -81.1 (m, 3F), -111.10 – -115.16 (m, 2F), -124.4 – -124.7 (m, 2F), -125.86 – -125.99 (m, 2F). **IR** (film): 3024, 2927, 2858, 1898, 1591, 1488, 1233, 1134, 1012, 842, 736. **HRMS** (APCI) exact mass calculated for [M-I]<sup>+</sup>: 428.9895, measured: 428.9897. Spectra are consistent with literature data.<sup>[9d]</sup>

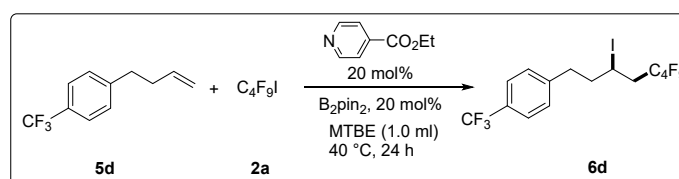

**6d**: Prepared following *general procedure* using **5d** (40.0 mg, 0.2 mmol, 1.0 equiv), ethyl isonicotinate (6.0 μL, 0.04 mmol, 20 mol%), B<sub>2</sub>pin<sub>2</sub> (10.2 mg, 0.04 mmol, 20 mol%), **2a** (68.9 μL, 0.4 mmol, 2.0 equiv) and MTBE (1 mL) at 40 °C. After 24 h, the reaction mixture was isolated with preparative TLC on silica (PE/EA = 50:1) to afford the product **6d** as colorless oil (93.4 mg, 75% yield). **<sup>1</sup>H NMR** (400 MHz, CDCl<sub>3</sub>) δ 7.57 (d, *J* = 7.9 Hz, 2H), 7.34 (d, *J* = 7.9 Hz, 2H), 4.29 – 4.21 (m, 1H), 3.06 – 2.91 (m, 2H), 2.88 – 2.74 (m, 2H), 2.20 – 2.07 (m, 2H). **<sup>13</sup>C NMR** (101 MHz, CDCl<sub>3</sub>) 144.1, 129.1 (d, *J*<sub>C-F</sub> = 32.4 Hz), 129.0, 125.7 (d, *J*<sub>C-F</sub> = 3.7 Hz), 123.0, 122.2 – 105.4 (m, 4C, - C<sub>4</sub>F<sub>9</sub>), 41.8 (t, *J*<sub>C-F</sub> = 20.8 Hz), 41.4, 35.7, 19.6, <sup>13</sup>C-NMR for C<sub>4</sub>F<sub>9</sub> could not be assigned. **<sup>19</sup>F NMR** (376 MHz, CDCl<sub>3</sub>) δ -62.4 – -62.5 (m, 3F), -81.0 – -81.2 (m, 3F), -111.0 – -115.2 (m, 2F), -124.5 – -124.7 (m, 2F), -125.8 – -126.0 (m, 2F). **IR** (film): 2927, 2856, 1620, 1434, 1326, 1130, 1067, 1019, 822. **HRMS** (APCI) exact mass calculated for [M-H<sub>2</sub>]<sup>+</sup>: 417.0518, measured: 417.0512.

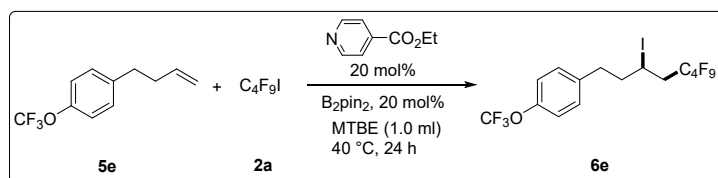

**6e**: Prepared following *general procedure* using **5e** (43.2 mg, 0.2 mmol, 1.0 equiv), ethyl isonicotinate (6.0 μL, 0.04 mmol, 20 mol%), B<sub>2</sub>pin<sub>2</sub> (10.2 mg, 0.04 mmol, 20 mol%), **2a** (68.9 μL, 0.4 mmol, 2.0 equiv) and MTBE (1 mL) at 40 °C. After 24 h, the reaction mixture was isolated with preparative TLC on silica (PE/EA = 50:1) to afford the product **6e** as colorless oil (78.7 mg, 70% yield). **<sup>1</sup>H NMR** (400 MHz, CDCl<sub>3</sub>) δ 7.24 (d, *J* = 8.5 Hz, 2H), 7.16 (d, *J* = 8.2 Hz, 2H), 4.33 – 4.26 (m, 1H), 3.05 – 2.68 (m, 4H), 2.19 – 2.02 (m, 2H). **<sup>13</sup>C NMR** (101 MHz, CDCl<sub>3</sub>) δ 148.0, 138.7, 129.9, 131.4 – 108.1 (m, 5C, OCF<sub>3</sub> and C<sub>4</sub>F<sub>9</sub>), 121.3, 41.7 (d, *J*<sub>C-F</sub> = 20.9 Hz), 41.7, 35.2, 19.7, <sup>13</sup>C-NMR for OCF<sub>3</sub> and

$C_4F_9$  could not be assigned.  $^{19}F$  NMR (376 MHz,  $CDCl_3$ )  $\delta$  -58.0 – -58.1 (m, 3F), -81.1 – -81.2 (m, 3F), -111.0 – -115.3 (m, 2F), -124.5 – -124.7 (m, 2F), -125.96 – -126.07 (m, 2F). IR (film): 3042, 2930, 2862, 1510, 1434, 1351, 1224, 1134, 845. HRMS (APCI) exact mass calculated for  $[M-I]^+$ : 435.0613, measured: 435.0612.

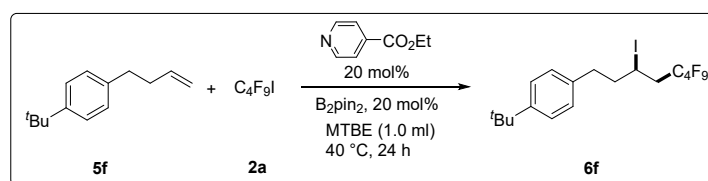

**6f**: Prepared following *general procedure* using **5f** (37.6 mg, 0.2 mmol, 1.0 equiv), ethyl isonicotinate (6.0  $\mu$ L, 0.04 mmol, 20 mol%),  $B_2pin_2$  (10.2 mg, 0.04 mmol, 20 mol%), **2a** (68.9  $\mu$ L, 0.4 mmol, 2.0 equiv) and MTBE (1 mL) at 40 °C. After 24 h, the reaction mixture was isolated with preparative TLC on silica (PE/EA = 50:1) to afford the product **6f** as colorless oil (79.0 mg, 74% yield).  $^1H$  NMR (400 MHz,  $CDCl_3$ )  $\delta$  7.40 – 7.33 (m, 2H), 7.21 – 7.15 (m, 2H), 4.36 – 4.28 (m, 1H), 3.01 – 2.71 (m, 4H), 2.23 – 2.06 (m, 2H), 1.35 (s, 9H).  $^{13}C$  NMR (101 MHz,  $CDCl_3$ )  $\delta$  149.4, 136.9, 128.2, 125.6, 121.1 – 108.1 (m, 4C,  $-C_4F_9$ ), 41.9, 41.7 (t,  $J_{C-F}$  = 20.9 Hz), 35.3, 34.5, 31.5, 20.2,  $^{13}C$ -NMR for  $C_4F_9$  could not be assigned.  $^{19}F$  NMR (376 MHz,  $CDCl_3$ )  $\delta$  -80.9 – 81.1 (m, 3F), -111.28 – -115.01 (m, 2F), -124.56 (m, 2F), -125.86 – -125.98 (m, 2F). IR (film): 2964, 2868, 1697, 1515, 1463, 1351, 1235, 1134, 880. HRMS (ESI-TOF) exact mass calculated for  $[M-Na]^+$ : 557.0358, measured: 557.0367.

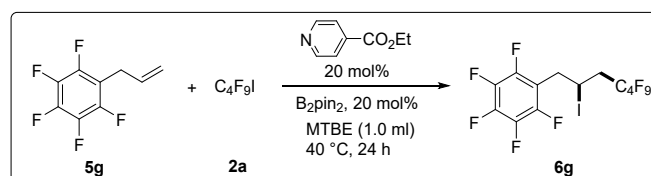

**6g**: Prepared following *general procedure* using **5g** (41.6 mg, 0.2 mmol, 1.0 equiv), ethyl isonicotinate (6.0  $\mu$ L, 0.04 mmol, 20 mol%),  $B_2pin_2$  (10.2 mg, 0.04 mmol, 20 mol%), **2a** (68.9  $\mu$ L, 0.4 mmol, 2.0 equiv) and MTBE (1 mL) at 40 °C. After 24 h, the reaction mixture was isolated with preparative TLC on silica (PE/EA = 50:1) to afford the product **6g** as colorless oil (66.5 mg, 60% yield).  $^1H$  NMR (400 MHz,  $CDCl_3$ )  $\delta$  4.57 – 4.47 (m, 1H), 3.44 – 3.28 (m, 2H), 3.11 – 2.81 (m, 2H).  $^{13}C$  NMR (101 MHz,  $CDCl_3$ )  $\delta$  145.3 (dm,  $J$  = 247.2 Hz), 140.8 (dm,  $J$  = 252.0 Hz), 137.8 (dm,  $J$  = 253.1 Hz), 122.2 – 114.5 (m, 4C,  $-C_4F_9$ ), 113.6 – 112.7 (m), 42.0 (t,  $J$  = 21.1 Hz), 33.9, 14.6,  $^{13}C$ -NMR for  $C_4F_9$  could not be assigned.  $^{19}F$  NMR (376 MHz,  $CDCl_3$ )  $\delta$  -81.1 – 81.2 (m, 3F), -111.18 – -115.14 (m, 2F), -124.4 – -124.6 (m, 2F), -126.8 – -126.2 (m, 2F), -142.30 – -142.39 (m, 2F), -154.6 – -154.7 (m, 1F), -161.72 – -161.86 (m, 2F). IR (film): 1657, 1523, 1506, 1433, 1236, 1134, 1041, 1010, 880. HRMS (APCI) exact mass calculated for  $[M-I]^+$ : 427.0162, measured: 427.0180.

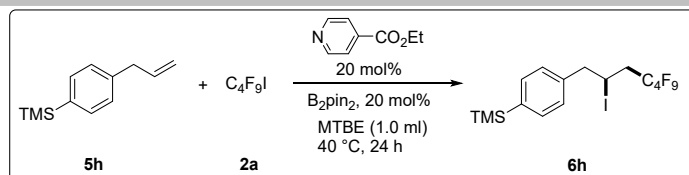

**6h:** Prepared following *general procedure* using **5h** (38.0 mg, 0.2 mmol, 1.0 equiv), ethyl isonicotinate (6.0  $\mu$ L, 0.04 mmol, 20 mol%),  $B_2pin_2$  (10.2 mg, 0.04 mmol, 20 mol%), **2a** (68.9  $\mu$ L, 0.4 mmol, 2.0 equiv) and MTBE (1 mL) at 40 °C. After 24 h, the reaction mixture was isolated with preparative TLC on silica (PE/EA = 50:1) to afford the product **6h** as colorless oil (75.0 mg, 70% yield).  **$^1H$  NMR** (400 MHz,  $CDCl_3$ )  $\delta$  7.52 – 7.48 (m, 2H), 7.21 – 7.18 (m, 2H), 4.51 – 4.44 (m, 1H), 3.32 – 3.18 (m, 2H), 2.96 – 2.83 (m, 2H), 0.28 (s, 9H).  **$^{13}C$  NMR** (101 MHz,  $CDCl_3$ )  $\delta$  139.6, 139.0, 133.8, 128.4, 121.3 – 114. (m, 4C,  $-C_4F_9$ ), 47.1, 40.8 (t,  $J_{C-F} = 20.9$  Hz), 19.1, 1.0,  $^{13}C$ -NMR for  $C_4F_9$  could not be assigned.  **$^{19}F$  NMR** (376 MHz,  $CDCl_3$ )  $\delta$  -80.9 – -81.1 (m, 3F), -111.87 – -114.31 (m, 2F), -124.4 – -124.6 (m, 2F), -125.8 – -125.9 (m, 2F). **IR** (film): 3014, 2956, 2898, 1601, 1350, 1235, 1135, 1109, 840. **HRMS** (APCI) exact mass calculated for  $[M-I]^+$ : 409.1029, measured: 409.1024.

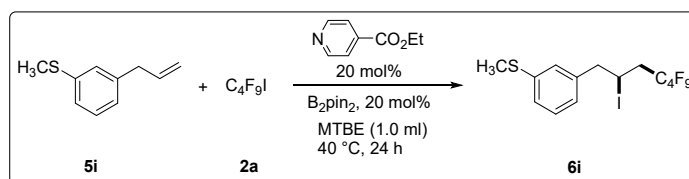

**6i:** Prepared following *general procedure* using **5i** (32.8 mg, 0.2 mmol, 1.0 equiv), ethyl isonicotinate (6.0  $\mu$ L, 0.04 mmol, 20 mol%),  $B_2pin_2$  (10.2 mg, 0.04 mmol, 20 mol%), **2a** (68.9  $\mu$ L, 0.4 mmol, 2.0 equiv) and MTBE (1 mL) at 40 °C. After 24 h, the reaction mixture was isolated with preparative TLC on silica (PE/EA = 50:1) to afford the product **6i** as Colorless oil (58.1 mg, 57% yield).  **$^1H$  NMR** (400 MHz,  $CDCl_3$ )  $\delta$  7.32 – 7.27 (m, 1H), 7.24 – 7.20 (m, 1H), 7.13 – 7.10 (m, 1H), 7.01 – 6.97 (m, 1H), 4.52 – 4.42 (m, 1H), 3.33 – 3.17 (m, 2H), 3.00 – 2.84 (m, 2H), 2.52 (s, 3H).  **$^{13}C$  NMR** (101 MHz,  $CDCl_3$ )  $\delta$  139.3, 139.1, 129.1, 127.2, 125.7, 125.5, 124.5 – 110.2 (m, 4C,  $-C_4F_9$ ), 46.8, 40.9 (t,  $J_{C-F} = 20.9$  Hz), 19.1, 15.8,  $^{13}C$ -NMR for  $C_4F_9$  could not be assigned.  **$^{19}F$  NMR** (376 MHz,  $CDCl_3$ )  $\delta$  -80.9 – -81.2 (m, 3F), -111.6 – -114.5 (m, 2F), -124.3 – -124.6 (m, 2F), -125.7 – -126.7 (m, 2F). **IR** (film): 2984, 2923, 2853, 1592, 1476, 1429, 1349, 1235, 1134, 1095, 877. **HRMS** (APCI) exact mass calculated for  $[M-H]^-$ : 508.9488, measured: 508.9469.

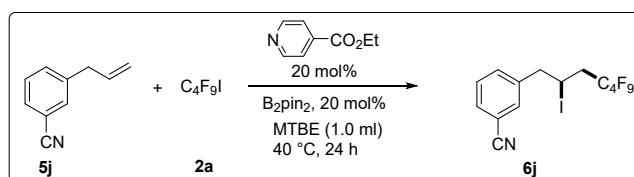

**6j**: Prepared following *general procedure* using **5j** (28.6 mg, 0.2 mmol, 1.0 equiv), ethyl isonicotinate (6.0  $\mu$ L, 0.04 mmol, 20 mol%),  $B_2pin_2$  (10.2 mg, 0.04 mmol, 20 mol%), **2a** (68.9  $\mu$ L, 0.4 mmol, 2.0 equiv) and MTBE (1 mL) at 40  $^{\circ}$ C. After 24 h, the reaction mixture was isolated with preparative TLC on silica (PE/EA = 10:1) to afford the product **6j** as colorless oil (68.4 mg, 70% yield).  **$^1H$  NMR** (400 MHz,  $CDCl_3$ )  $\delta$  7.63 – 7.57 (m, 1H), 7.51 (s, 1H), 7.47 – 7.45 (m, 2H), 4.43 – 4.38 (m, 1H), 3.42 – 3.34 (m, 1H), 3.17 – 3.10 (m, 1H), 3.03 – 2.81 (m, 2H).  **$^{13}C$  NMR** (101 MHz,  $CDCl_3$ )  $\delta$  140.1, 133.5, 132.6, 131.2, 129.5, 121.2 – 106.3 (m, 4C,  $-C_4F_9$ ), 118.6, 112.8, 45.9, 41.3 (t,  $J_{C-F}$  = 20.9 Hz), 18.8,  $^{13}C$ -NMR for  $C_4F_9$  could not be assigned.  **$^{19}F$  NMR** (376 MHz,  $CDCl_3$ )  $\delta$  -81.9 – -81.1 (m, 3F), -110.97 – -114.60 (m, 2F), -124.3 – -124.6 (m, 2F), -125.8 – -126.0 (m, 2F). **IR** (film): 3066, 2931, 2231, 1602, 1485, 1431, 1350, 1221, 1134, 1019, 879. **HRMS** (APCI) exact mass calculated for  $[M-I]^+$ : 362.0586, measured: 362.0581.

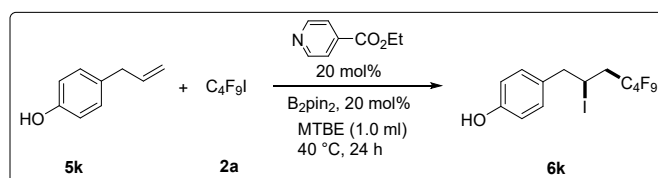

**6k**: Prepared following *general procedure* using **5k** (26.8 mg, 0.2 mmol, 1.0 equiv), ethyl isonicotinate (6.0  $\mu$ L, 0.04 mmol, 20 mol%),  $B_2pin_2$  (10.2 mg, 0.04 mmol, 20 mol%), **2a** (68.9  $\mu$ L, 0.4 mmol, 2.0 equiv) and MTBE (1 mL) at 40  $^{\circ}$ C. After 24 h, the reaction mixture was isolated with preparative TLC on silica (PE/EA = 10:1) to afford the product **6k** as colorless oil (57.6 mg, 60% yield).  **$^1H$  NMR** (400 MHz,  $CDCl_3$ )  $\delta$  7.09 – 7.05 (m, 2H), 6.87 – 6.75 (m, 2H), 5.38 (s, 1H), 4.45 – 4.38 (m, 1H), 3.22 – 3.10 (m, 2H), 2.94 – 2.79 (m, 2H).  **$^{13}C$  NMR** (101 MHz,  $CDCl_3$ )  $\delta$  154.8, 131.0, 130.4, 126.6 – 108.9 (m, 4C,  $-C_4F_9$ ), 115.6, 46.3, 40.6 (t,  $J_{C-F}$  = 20.9 Hz), 20.3,  $^{13}C$ -NMR for  $C_4F_9$  could not be assigned.  **$^{19}F$  NMR** (376 MHz,  $CDCl_3$ )  $\delta$  -80.9 – 81.1 (m, 3F), -111.89 – -114.32 (m, 2F), -124.4 – -124.6 (m, 2F), -125.8 – -126.0 (m, 2F). **IR** (film): 3375, 3024, 2928, 2692, 1715, 1613, 1515, 1444, 1351, 1233, 1134, 1094, 881. **HRMS** (APCI) exact mass calculated for  $[M-I]^+$ : 353.0582, measured: 353.0574.

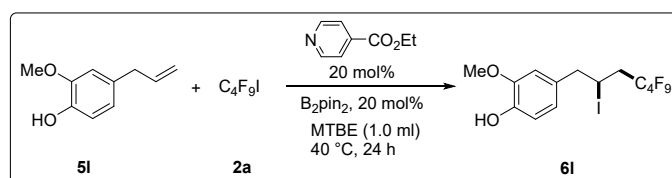

**6l**: Prepared following *general procedure* using **5l** (32.8 mg, 0.2 mmol, 1.0 equiv), ethyl isonicotinate (6.0  $\mu$ L, 0.04 mmol, 20 mol%),  $B_2pin_2$  (10.2 mg, 0.04 mmol, 20 mol%), **2a** (68.9  $\mu$ L, 0.4 mmol, 2.0 equiv) and MTBE (1 mL) at 40  $^{\circ}$ C. After 24 h, the reaction mixture was isolated with preparative TLC on silica (PE/EA = 10:1) to afford the product **6l** as colorless oil (61.2 mg, 65% yield).  **$^1H$  NMR** (400 MHz,  $CDCl_3$ )  $\delta$  6.90 – 6.87 (m, 1H), 6.71 – 6.68 (m, 2H), 5.63 (br, 1H), 4.46 – 4.40 (m,

1H), 3.90 (s, 3H), 3.23 – 3.10 (m, 2H), 2.95 – 2.78 (m, 2H). <sup>13</sup>C NMR (101 MHz, CDCl<sub>3</sub>) δ 146.6, 145.0, 130.5, 122.0, 121.2 – 108.3 (m, 4C, -C<sub>4</sub>F<sub>9</sub>), 114.6, 111.5, 56.0, 46.9, 40.5 (t, J<sub>C-F</sub> = 20.9 Hz), 19.9, <sup>13</sup>C-NMR for C<sub>4</sub>F<sub>9</sub> could not be assigned. <sup>19</sup>F NMR (376 MHz, CDCl<sub>3</sub>) δ -80.1 – -82.2 (m, 3F), -110.99 – -115.59 (m, 2F), -124.07 – -124.99 (m, 2F), -125.49 – -126.44 (m, 2F). IR (film): 3513, 3007, 2940, 2846, 1613, 1517, 1432, 1353, 1271, 1237, 1134, 1035, 880. HRMS (APCI) exact mass calculated for [M-I]<sup>+</sup>: 383.0688, measured: 383.0682.

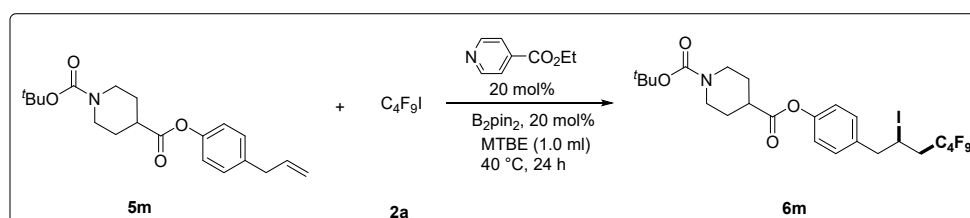

**6m**: Prepared following *general procedure* using **5m** (69.0 mg, 0.2 mmol, 1.0 equiv), ethyl isonicotinate (6.0 μL, 0.04 mmol, 20 mol%), B<sub>2</sub>pin<sub>2</sub> (10.2 mg, 0.04 mmol, 20 mol%), **2a** (68.9 μL, 0.4 mmol, 2.0 equiv) and MTBE (1 mL) at 40 °C. After 24 h, the reaction mixture was isolated with preparative TLC on silica (PE/EA = 20:1) to afford the product **6m** as colorless viscous oil (55.3 mg, 40% yield). <sup>1</sup>H NMR (400 MHz, CDCl<sub>3</sub>) δ 7.24 – 7.17 (m, 2H), 7.08 – 7.01 (m, 2H), 4.47 – 4.39 (m, 1H), 4.07 (s, 2H), 3.32 – 3.13 (m, 2H), 2.98 – 2.80 (m, 4H), 2.75 – 2.65 (m, 1H), 2.06 – 1.99 (m, 2H), 1.83 – 1.70 (m, 2H), 1.47 (s, 9H). <sup>13</sup>C NMR (101 MHz, CDCl<sub>3</sub>) δ 173.0, 154.8, 149.9, 136.2, 130.1, 121.7, 121.0 – 113.7 (m, 4C, -C<sub>4</sub>F<sub>9</sub>), 79.8, 46.2, 42.8, 41.3, 40.9 (t, J<sub>C-F</sub> = 20.9 Hz), 28.5, 28.0, 19.3, <sup>13</sup>C-NMR for C<sub>4</sub>F<sub>9</sub> could not be assigned. <sup>19</sup>F NMR (376 MHz, CDCl<sub>3</sub>) δ -80.9 – -91.1 (m, 3F), -111.62 – -114.43 (m, 2F), -124.3 – -12.6 (m, 2F), -125.7 – -126.0 (m, 2F). IR (film): 3478, 2978, 2933, 2862, 1757, 1696, 1508, 1450, 1426, 1367, 1236, 1167, 1030, 879. HRMS (APCI) exact mass calculated for [M-H<sub>2</sub>]<sup>-</sup>: 562.1645, measured: 562.1635.

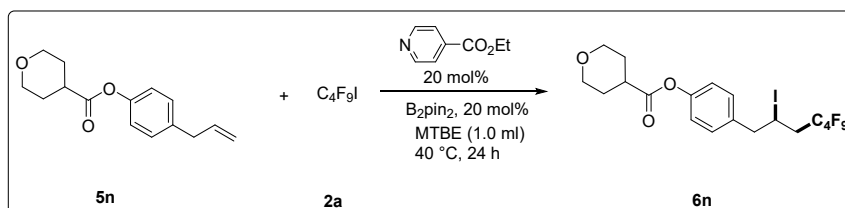

**6n**: Prepared following *general procedure* using **5n** (49.2 mg, 0.2 mmol, 1.0 equiv), ethyl isonicotinate (6.0 μL, 0.04 mmol, 20 mol%), B<sub>2</sub>pin<sub>2</sub> (10.2 mg, 0.04 mmol, 20 mol%), **2a** (68.9 μL, 0.4 mmol, 2.0 equiv) and MTBE (1 mL) at 40 °C. After 24 h, the reaction mixture was isolated with preparative TLC on silica (PE/EA = 20:1) to afford the product **6n** as colorless viscous oil (69.2 mg, 50% yield). <sup>1</sup>H NMR (400 MHz, CDCl<sub>3</sub>) δ 7.25 – 7.18 (m, 2H), 7.08 – 7.03 (m, 2H), 4.47 – 4.37 (m, 1H), 4.07 – 3.98 (m, 2H), 3.55 – 3.46 (m, 2H), 3.33 – 3.25 (m, 1H), 3.20 – 3.13 (m, 1H), 2.97 – 2.76 (m, 3H), 2.03 – 1.88 (m, 4H). <sup>13</sup>C NMR (101 MHz, CDCl<sub>3</sub>) δ 173.0, 149.9, 136.2, 130.1, 121.7, 120.9 – 106.9 (m, 4C,

-C<sub>4</sub>F<sub>9</sub>), 67.1, 46.2, 40.9 (t,  $J = 20.9$  Hz), 40.3, 28.6, 19.4. <sup>13</sup>C-NMR for C<sub>4</sub>F<sub>9</sub> could not be assigned. <sup>19</sup>F NMR (376 MHz, CDCl<sub>3</sub>) δ -80.9 – -81.1 (m, 3F), -111.60 – -114.43 (m, 2F), -124.4 – -124.6 (m, 2F), -125.8 – -126.0 (m, 2F). IR (film): 3036, 2960, 2931, 2850, 1754, 1508, 1350, 1221, 1134. 1093, 880. HRMS (ESI-TOF) exact mass calculated for [M+H]<sup>+</sup>: 593.0230, measured: 593.0219.

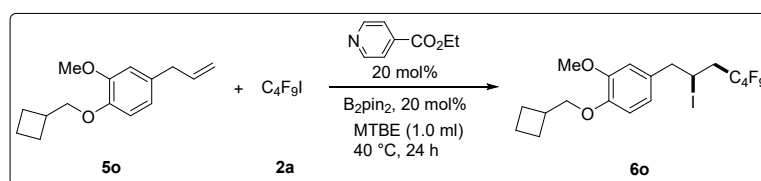

**6o**: Prepared following *general procedure* using **5o** (46.4 mg, 0.2 mmol, 1.0 equiv), ethyl isonicotinate (6.0 μL, 0.04 mmol, 20 mol%), B<sub>2</sub>pin<sub>2</sub> (10.2 mg, 0.04 mmol, 20 mol%), **2a** (68.9 μL, 0.4 mmol, 2.0 equiv) and MTBE (1 mL) at 80 °C. After 24 h, the reaction mixture was isolated with preparative TLC on silica (PE/EA = 10:1) to afford the product **6o** as white solid (98.3 mg, 85% yield). mp 66-67 °C; <sup>1</sup>H NMR (400 MHz, CDCl<sub>3</sub>) δ 6.86 – 6.82 (m, 1H), 6.75 – 6.67 (m, 2H), 4.48 – 4.39 (m, 1H), 4.01 – 3.95 (m, 2H), 3.86 (s, 3H), 3.24 – 3.13 (m, 2H), 2.95 – 2.75 (m, 3H), 2.22 – 2.10 (m, 2H), 2.01 – 1.81 (m, 4H). <sup>13</sup>C NMR (101 MHz, CDCl<sub>3</sub>) δ 149.6, 148.2, 131.2, 121.4, 121.0 – 106.8 (m, 4C, -C<sub>4</sub>F<sub>9</sub>), 113.5, 113.0, 73.5, 56.2, 46.8, 40.4 (t,  $J_{C-F} = 20.8$  Hz), 34.7, 25.2, 19.6, 18.7, <sup>13</sup>C-NMR for C<sub>4</sub>F<sub>9</sub> could not be assigned. <sup>19</sup>F NMR (376 MHz, CDCl<sub>3</sub>) δ -81.00 – -81.19 (m, 3F), -112.11 – -114.28 (m, 2F), -124.57 – -124.64 (m, 2F), -125.8 – -126.0 (m, 2F). IR (film): 2937, 2862, 1606, 1515, 1465, 1420, 1352, 1235, 1134, 1038, 879. HRMS (APCI) exact mass calculated for [M-I]<sup>+</sup>: 451.1314, measured: 451.1308.

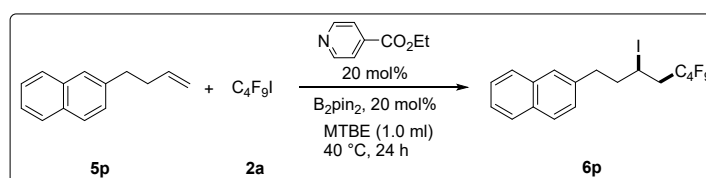

**6p**: Prepared following *general procedure* using **5p** (36.4 mg, 0.2 mmol, 1.0 equiv), ethyl isonicotinate (6.0 μL, 0.04 mmol, 20 mol%), B<sub>2</sub>pin<sub>2</sub> (10.2 mg, 0.04 mmol, 20 mol%), **2a** (68.9 μL, 0.4 mmol, 2.0 equiv) and MTBE (1 mL) at 40 °C. After 24 h, the reaction mixture was isolated with preparative TLC on silica (PE/EA = 10:1) to afford the product **6p** as colorless oil (68.6 mg, 65% yield). <sup>1</sup>H NMR (400 MHz, CDCl<sub>3</sub>) δ 7.84 – 7.80 (m, 3H), 7.70 – 7.66 (m, 1H), 7.51 – 7.45 (m, 2H), 7.37 – 7.32 (m, 1H), 4.35 – 4.26 (m, 1H), 3.14 – 2.99 (m, 2H), 2.94 – 2.88 (m, 2H), 2.25 – 2.20 (m, 2H). <sup>13</sup>C NMR (101 MHz, CDCl<sub>3</sub>) δ 137.4, 133.7, 132.3, 128.4, 127.8, 127.6, 127.0, 126.9, 126.2, 125.6, 122.7 – 114.8 (m, 4C, -C<sub>4</sub>F<sub>9</sub>), 41.7 (t,  $J_{C-F} = 20.8$  Hz), 41.7, 36.0, 20.1, <sup>13</sup>C-NMR for C<sub>4</sub>F<sub>9</sub> could not be assigned. <sup>19</sup>F NMR (376 MHz, CDCl<sub>3</sub>) δ -80.8 – -81.1 (m, 3F), -111.14 – -115.05 (m, 2F), -124.4 – -124.6 (m, 2F), -125.7 – -125.9 (m, 2F). IR (film): 3054, 2927, 2856, 1908, 1634, 1601, 1508, 1232, 1133, 1019, 816. HRMS (ESI-TOF) exact mass calculated for [M-I]<sup>+</sup>: 401.0946, measured: 401.0945.

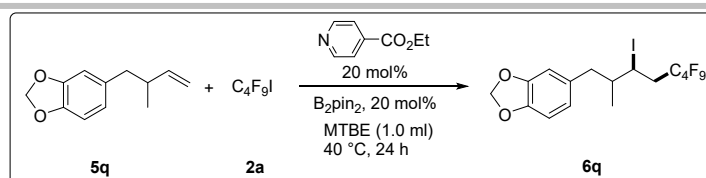

**6q:** Prepared following *general procedure* using **5q** (38.4 mg, 0.2 mmol, 1.0 equiv), ethyl isonicotinate (6.0  $\mu$ L, 0.04 mmol, 20 mol%),  $B_2pin_2$  (10.2 mg, 0.04 mmol, 20 mol%), **2a** (68.9  $\mu$ L, 0.4 mmol, 2.0 equiv) and MTBE (1 mL) at 40 °C. After 24 h, the reaction mixture was isolated with preparative TLC on silica (PE/EA = 10:1) to afford the product **6q** as colorless oil (76.4 mg, 70% yield, d. r. = 1: 1.9). The two diastereomers were not separated by preparative TLC. Reported as a mixture of diastereomers.  **$^1H$  NMR** (400 MHz,  $CDCl_3$ )  $\delta$  6.78 – 6.54 (m, 3H), 5.95 – 5.92 (m, 2H), 4.49 – 4.43 (m, 0.34H), 4.36 – 4.29 (m, 0.66H), 2.93 – 2.76 (m, 2H), 2.62 – 2.22 (m, 2H), 1.49 – 1.39 (m, 0.34H), 1.15 – 1.04 (m, 0.66H), 1.01 – 0.89 (m, 3H).  **$^{13}C$  NMR** (101 MHz,  $CDCl_3$ )  $\delta$  147.9, 146.3, 146.2, 132.9, 132.7, 122.2, 122.1, 121.4 – 114.7 (m, 4C,  $-C_4F_9$ ), 109.5, 109.4, 108.4, 108.3, 101.1, 101.0, 43.9, 41.8, 41.8, 40.6, 40.5, 40.0, 39.7 (t,  $J_{C-F}$  = 20.4 Hz), 38.8 (t,  $J_{C-F}$  = 20.9 Hz), 31.3, 29.5, 20.1, 17.1,  $^{13}C$ -NMR for  $C_4F_9$  could not be assigned.  **$^{19}F$  NMR** (376 MHz,  $CDCl_3$ )  $\delta$  -80.6 – -81.5 (m, 3F), -110.2 – -116.7 (m, 2F), -123.1 – -125.0 (m, 2F), -125.5 – -126.7 (m, 2F). **IR** (film): 2968, 2931, 2894, 1609, 1504, 1490, 1441, 1347, 1244, 1135, 1042, 941, 844. **HRMS** (APCI) exact mass calculated for  $[M-I]^+$ : 409.0845, measured: 409.0838.

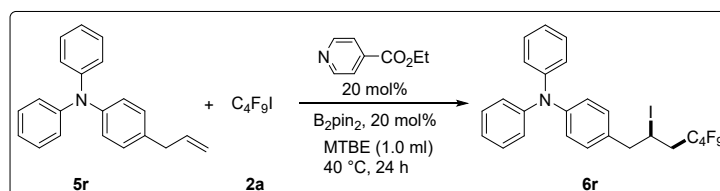

**6r:** Prepared following *general procedure* using **5r** (57.0 mg, 0.2 mmol, 1.0 equiv), ethyl isonicotinate (6.0  $\mu$ L, 0.04 mmol, 20 mol%),  $B_2pin_2$  (10.2 mg, 0.04 mmol, 20 mol%), **2a** (68.9  $\mu$ L, 0.4 mmol, 2.0 equiv) and MTBE (1 mL) at 40 °C. After 24 h, the reaction mixture was isolated with preparative TLC on silica (PE/EA = 20:1) to afford the product **6r** as colorless oil (75.7 mg, 60% yield).  **$^1H$  NMR** (400 MHz,  $CDCl_3$ )  $\delta$  7.15 – 7.06 (m, 4H), 7.00 – 6.86 (m, 10H), 4.36 – 4.26 (m, 1H), 3.14 – 3.01 (m, 2H), 2.88 – 2.66 (m, 2H).  **$^{13}C$  NMR** (101 MHz,  $CDCl_3$ )  $\delta$  147.7, 147.0, 132.5, 130.2, 129.8, 129.2, 124.3, 123.8, 122.9, 120.6 – 114.3 (m, 4C,  $-C_4F_9$ ), 46.5, 40.5 (t,  $J_{C-F}$  = 20.9 Hz), 19.4,  $^{13}C$ -NMR for  $C_4F_9$  could not be assigned.  **$^{19}F$  NMR** (376 MHz,  $CDCl_3$ )  $\delta$  -80.9 – -81.1 (m, 3F), -112.1 – -113.8 (m, 2F), -124.4 – -124.7 (m, 2F), -125.7 – -125.9 (m, 2F). **IR** (film): 3062, 3034, 2926, 1941, 1791, 1593, 1510, 1494, 1236, 1133, 1028, 880. **HRMS** (ESI-TOF) exact mass calculated for  $[M-I]^+$ : 504.1368, measured: 504.1364.



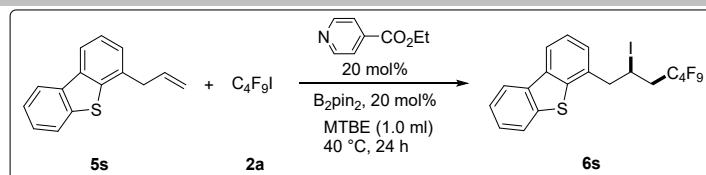

**6s:** Prepared following *general procedure* using **5s** (44.8 mg, 0.2 mmol, 1.0 equiv), ethyl isonicotinate (6.0  $\mu$ L, 0.04 mmol, 20 mol%),  $B_2pin_2$  (10.2 mg, 0.04 mmol, 20 mol%), **2a** (68.9  $\mu$ L, 0.4 mmol, 2.0 equiv) and MTBE (1 mL) at 40  $^{\circ}$ C. After 24 h, the reaction mixture was isolated with preparative TLC on silica (PE/EA = 20:1) to afford the product **6s** as white solid (62.7 mg, 55% yield). mp 54-57  $^{\circ}$ C;  $^1H$  NMR (400 MHz,  $CDCl_3$ )  $\delta$  8.18 – 8.10 (m, 2H), 7.93 – 7.84 (m, 1H), 7.50 – 7.46 (m, 3H), 7.52 – 7.44 (m, 1H), 4.91 – 4.80 (m, 1H), 3.63 – 3.47 (m, 2H), 3.12 – 2.91 (m, 2H).  $^{13}C$  NMR (101 MHz,  $CDCl_3$ )  $\delta$  139.3, 138.8, 136.3, 136.0, 133.4, 127.5, 127.1, 124.9, 124.7, 123.0, 121.9, 120.9, 120.6 – 107.8 (m, 4C,  $-C_4F_9$ ), 46.7, 41.4 (t,  $J_{C-F}$  = 20.9 Hz), 16.3,  $^{13}C$ -NMR for  $C_4F_9$  could not be assigned.  $^{19}F$  NMR (376 MHz,  $CDCl_3$ )  $\delta$  -80.8 – -81.0 (m, 3F), -111.6 – -114.4 (m, 2F), -124.4 (m, 2F), -125.7 – -125.9 (m, 2F). IR (film): 3066, 2932, 1585, 1441, 1403, 1349, 1221, 1134, 1090, 879. HRMS (APCI) exact mass calculated for  $[M-I]^+$ : 443.0511, measured: 443.0504.

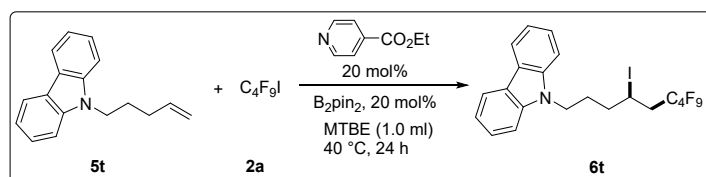

**6t:** Prepared following *general procedure* using **5t** (47.0 mg, 0.2 mmol, 1.0 equiv), ethyl isonicotinate (6.0  $\mu$ L, 0.04 mmol, 20 mol%),  $B_2pin_2$  (10.2 mg, 0.04 mmol, 20 mol%), **2a** (68.9  $\mu$ L, 0.4 mmol, 2.0 equiv) and MTBE (1 mL) at 40  $^{\circ}$ C. After 24 h, the reaction mixture was isolated with preparative TLC on silica (PE/EA = 20:1) to afford the product **6t** as colorless oil (75.5 mg, 65% yield).  $^1H$  NMR (400 MHz,  $CDCl_3$ )  $\delta$  8.20 – 8.11 (m, 2H), 7.56 – 7.48 (m, 2H), 7.46 – 7.39 (m, 2H), 7.33 – 7.24 (m, 2H), 4.41 – 4.17 (m, 3H), 2.97 – 2.69 (m, 2H), 2.24 – 2.16 (m, 1H), 2.09 – 2.02 (m, 1H), 1.94 – 1.84 (m, 2H).  $^{13}C$  NMR (101 MHz,  $CDCl_3$ )  $\delta$  140.3, 125.9, 123.1, 120.6, 120.3 – 111.5 (m, 4C,  $-C_4F_9$ ), 119.2, 108.6, 41.9, 41.4 (t,  $J_{C-F}$  = 20.8 Hz), 37.7, 29.1, 19.2,  $^{13}C$ -NMR for  $C_4F_9$  could not be assigned.  $^{19}F$  NMR (376 MHz,  $CDCl_3$ )  $\delta$  -80.9 – -81.0 (m, 3F), -111.73 – -115.01 (m, 2F), -124.4 – -124.6 (m, 2F), -125.7 – -125.9 (m, 2F). IR (film): 3052, 2936, 2879, 1627, 1485, 1349, 1235, 1134, 880. HRMS (APCI) exact mass calculated for  $[M-I]^+$ : 454.1212, measured: 454.1203.

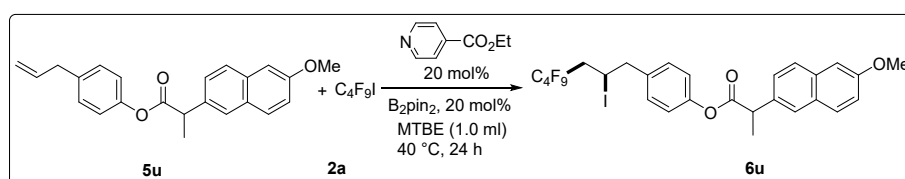

**6u**: Prepared following *general procedure* using **5u** (69.2 mg, 0.2 mmol, 1.0 equiv), ethyl isonicotinate (6.0  $\mu$ L, 0.04 mmol, 20 mol%), B<sub>2</sub>pin<sub>2</sub> (10.2 mg, 0.04 mmol, 20 mol%), **2a** (68.9  $\mu$ L, 0.4 mmol, 2.0 equiv) and MTBE (1 mL) at 40 °C. After 24 h, the reaction mixture was isolated with preparative TLC on silica (PE/EA = 20:1) to afford the product **6u** as colorless viscous oil (96.9 mg, 70% yield). **<sup>1</sup>H NMR** (400 MHz, CDCl<sub>3</sub>)  $\delta$  7.80 – 7.73 (m, 3H), 7.54 – 7.48 (m, 1H), 7.20 – 7.12 (m, 4H), 7.01 – 6.93 (m, 2H), 4.45 – 4.35 (m, 1H), 4.14 – 4.08 (m, 1H), 3.93 (s, 3H), 3.29 – 3.12 (m, 2H), 2.99 – 1.75 (m, 2H), 1.73 – 1.67 (m, 3H). **<sup>13</sup>C NMR** (101 MHz, CDCl<sub>3</sub>)  $\delta$  173.2, 157.9, 150.1, 136.1, 135.2, 133.9, 130.0, 129.4, 129.1, 127.5, 126.3, 121.7, 121.3, 121.2 – 108.6 (m, 4C, -C<sub>4</sub>F<sub>9</sub>), 119.2, 105.7, 55.4, 46.2, 45.7, 40.8 (t,  $J_{C-F}$  = 20.9 Hz), 19.3, 18.5, <sup>13</sup>C-NMR for C<sub>4</sub>F<sub>9</sub> could not be assigned. **<sup>19</sup>F NMR** (376 MHz, CDCl<sub>3</sub>)  $\delta$  -80.8 – -81.1 (m, 3F), -111.59 – -114.45 (m, 2F), -124.4 – -124.6 (m, 2F), -125.7 – -125.9 (m, 2F). **IR** (film): 2978, 2937, 2841, 1754, 1606, 1507, 1222, 1167, 1134, 1071, 1033, 853. **HRMS** (APCI) exact mass calculated for [M+H]<sup>+</sup>: 693.0543, measured: 693.0526.

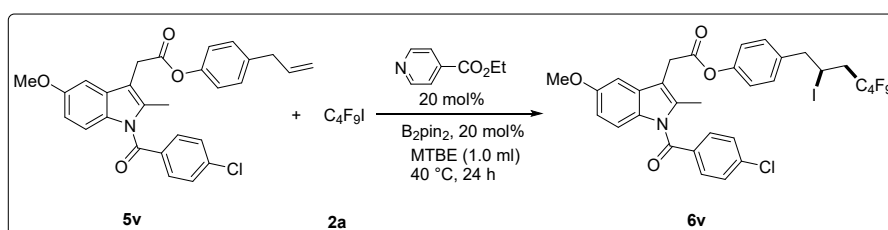

**6v**: Prepared following *general procedure* using **5v** (94.6 mg, 0.2 mmol, 1.0 equiv), ethyl isonicotinate (6.0  $\mu$ L, 0.04 mmol, 20 mol%), B<sub>2</sub>pin<sub>2</sub> (10.2 mg, 0.04 mmol, 20 mol%), **2a** (68.9  $\mu$ L, 0.4 mmol, 2.0 equiv) and MTBE (1 mL) at 40 °C. After 24 h, the reaction mixture was isolated with preparative TLC on silica (PE/EA = 20:1) to afford the product **6v** as white solid (81.9 mg, 50% yield). mp 55-56 °C; **<sup>1</sup>H NMR** (400 MHz, CDCl<sub>3</sub>)  $\delta$  7.70 – 7.65 (m, 2H), 7.50 – 7.44 (m, 2H), 7.21 – 7.17 (m, 2H), 7.07 – 7.03 (m, 3H), 6.90 – 6.87 (m, 1H), 6.71 – 6.67 (m, 1H), 4.43 – 4.39 (m, 1H), 3.90 (s, 2H), 3.84 (s, 3H), 3.31 – 3.23 (m, 1H), 3.18 – 3.09 (m, 1H), 2.98 – 2.79 (m, 2H), 2.46 (s, 3H). **<sup>13</sup>C NMR** (101 MHz, CDCl<sub>3</sub>)  $\delta$  169.3, 168.4, 156.2, 150.6, 150.0, 139.5, 136.3, 133.9, 131.3, 130.9, 130.6, 130.1, 129.2, 121.6, 120.7 – 107.0 (m, 4C, -C<sub>4</sub>F<sub>9</sub>), 115.1, 112.0, 111.9, 101.3, 55.8, 46.2, 40.9 (t,  $J_{C-F}$  = 20.9 Hz), 30.7, 19.4, 13.5, <sup>13</sup>C-NMR for C<sub>4</sub>F<sub>9</sub> could not be assigned. **<sup>19</sup>F NMR** (376 MHz, CDCl<sub>3</sub>)  $\delta$  -80.8 – -81.1 (m, 3F), -111.53 – -114.44 (m, 2F), -124.3 – -124.5 (m, 2F), -125.7 – -125.9 (m, 2F). **IR** (film): 3486, 3052, 2946, 2846, 1751, 1674, 1616, 1595, 1507, 1440, 1358, 1324, 1231, 1108, 1071, 878. **HRMS** (APCI) exact mass calculated for [M+H]<sup>+</sup>: 820.0368, measured: 820.0367.

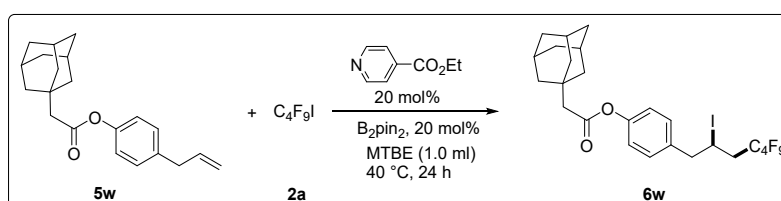

**6w**: Prepared following *general procedure* using **5w** (62.0 mg, 0.2 mmol, 1.0 equiv), ethyl isonicotinate (6.0  $\mu$ L, 0.04 mmol, 20 mol%), B<sub>2</sub>pin<sub>2</sub> (10.2 mg, 0.04 mmol, 20 mol%), **2a** (68.9  $\mu$ L, 0.4 mmol, 2.0 equiv) and MTBE (1 mL) at 40 °C. After 24 h, the reaction mixture was isolated with preparative TLC on silica (PE/EA = 20:1) to afford the product **6w** as colorless viscous oil (91.8 mg, 70% yield). **<sup>1</sup>H NMR** (400 MHz, CDCl<sub>3</sub>)  $\delta$  7.23 – 7.18 (m, 2H), 7.10 – 7.04 (m, 2H), 4.47 – 4.39 (m, 1H), 3.32 – 3.14 (m, 2H), 2.98 – 2.80 (m, 2H), 2.30 (s, 2H), 2.02 (t, *J* = 3.1 Hz, 3H), 1.76 – 1.66 (m, 12H). **<sup>13</sup>C NMR** (101 MHz, CDCl<sub>3</sub>)  $\delta$  170.2, 150.0, 135.9, 130.0, 122.0, 120.8 – 109.4 (m, 4C, -C<sub>4</sub>F<sub>9</sub>), 48.8, 46.3, 42.6, 40.91 (t, *J*<sub>C-F</sub> = 20.9 Hz), 36.8, 33.3, 28.7, 19.4, <sup>13</sup>C-NMR for C<sub>4</sub>F<sub>9</sub> could not be assigned. **<sup>19</sup>F NMR** (376 MHz, CDCl<sub>3</sub>)  $\delta$  -80.9 – -81.1 (m, 3F), -111.6 – -114.3 (m, 3F), -124.4 – -124.6 (m, 2F), -125.8 – -125.9 (m, 2F). **IR** (film): 2905, 2849, 1754, 1508, 1452, 1349, 1235, 1134, 1098, 881. **HRMS** (APCI) exact mass calculated for [M-I]<sup>+</sup>: 529.1784, measured: 529.1773.

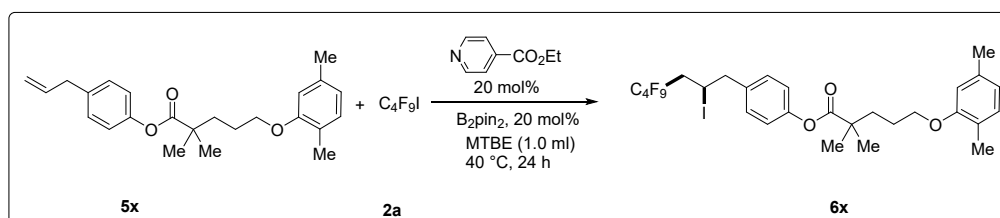

**6x**: Prepared following *general procedure* using **5x** (73.2 mg, 0.2 mmol, 1.0 equiv), ethyl isonicotinate (6.0  $\mu$ L, 0.04 mmol, 20 mol%), B<sub>2</sub>pin<sub>2</sub> (10.2 mg, 0.04 mmol, 20 mol%), **2a** (68.9  $\mu$ L, 0.4 mmol, 2.0 equiv) and MTBE (1 mL) at 40 °C. After 24 h, the reaction mixture was isolated with preparative TLC on silica (PE/EA = 20:1) to afford the product **6x** as colorless viscous oil (111.1 mg, 78% yield). **<sup>1</sup>H NMR** (400 MHz, CDCl<sub>3</sub>)  $\delta$  7.23 – 7.19 (m, 2H), 7.07 – 6.99 (m, 3H), 6.72 – 6.63 (m, 2H), 4.48 – 4.41 (m, 1H), 4.05 – 3.95 (m, 2H), 3.31 – 3.24 (m, 1H), 3.21 – 3.12 (m, 1H), 3.00 – 2.80 (m, 2H), 2.33 (s, 3H), 2.20 (s, 3H), 1.93 – 1.84 (m, 4H), 1.39 (s, 6H). **<sup>13</sup>C NMR** (101 MHz, CDCl<sub>3</sub>)  $\delta$ . 176.3, 156.9, 150.3, 136.5, 135.9, 130.4, 130.0, 123.7, 121.8, 120.8, 112.0, 121.4 – 108.0 (m, 4C, -C<sub>4</sub>F<sub>9</sub>), 67.8, 46.2, 42.5, 40.8 (t, *J*<sub>C-F</sub> = 20.8 Hz), 37.2, 25.3, 25.2, 25.2, 21.4, 19.3, 15.8, <sup>13</sup>C-NMR for C<sub>4</sub>F<sub>9</sub> could not be assigned. **<sup>19</sup>F NMR** (376 MHz, CDCl<sub>3</sub>)  $\delta$  -80.9 – -81.1 (m, 3F), -111.61 – -114.37 (m, 2F), -124.4 – -124.5 (m, 2F), -125.7 – -125.9 (m, 2F). **IR** (film): 2951, 2871, 1750, 1614, 1508, 1474, 1235, 1132, 1066, 881. **HRMS** (APCI) exact mass calculated for [M+H]<sup>+</sup>: 713.1169, measured: 713.1150.

## 5. Computational Investigations

### 5.1 Computational methods

All calculations were performed with the Gaussian 16 package.<sup>[10]</sup> A “broken-symmetry” guess was used for calculations on open-shell systems. Geometry structures of all the stationary points were optimized by using the M06-2X<sup>[11]</sup> method. The LANL2DZ basis set is employed for the iodine atom, and the 6-31G(d,p) basis set is used for all the other atoms. At the same level of theory, vibrational

frequencies of all the stationary points were further calculated to check the nature of the minima and the transition states. To confirm that each transition state connects the desired reactants and products along the reaction path, we performed intrinsic reaction coordinate (IRC)<sup>[12]</sup> calculations at the same level. To obtain reliable energies, single point energies (Esol) were computed using M06-2X method with a larger basis set. The cc-PVTZ basis set is used for all the other atoms (the LANL2DZ basis set for the iodine atom). The solvent effect was treated with the polarizable continuum model (PCM) with benzene as the solvent.<sup>[13]</sup> The 3D structures were generated with CLY view.<sup>[14]</sup>

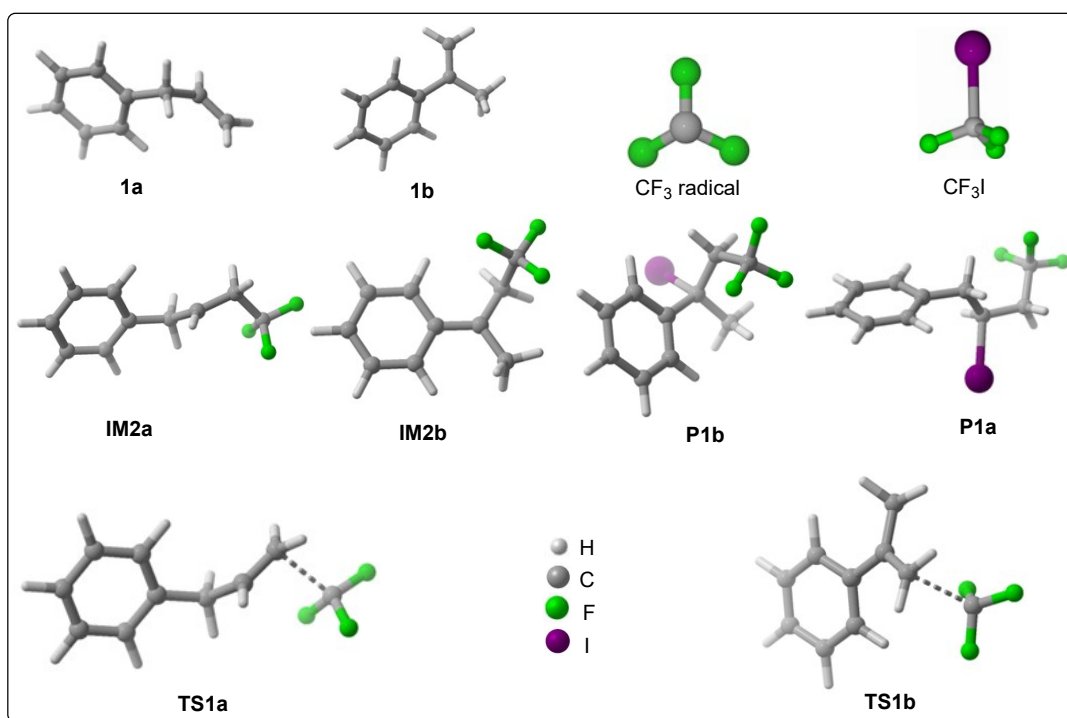

**Figure S4.** Optimized structures of reactants, product and intermediates for the atom transfer radical addition process with allylbenzene **1a** and  $\alpha$ -methylstyrene **1b**

## 5.2 Computational mechanism studies on the reaction of alpha-cyclopropylstyrene **1c** and CF<sub>3</sub> radical.

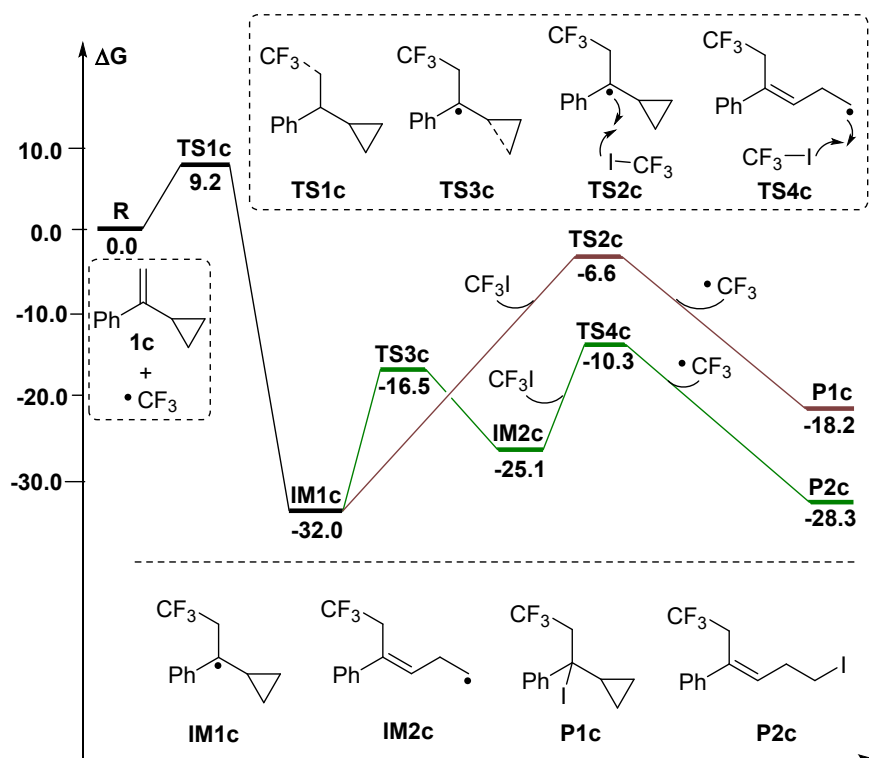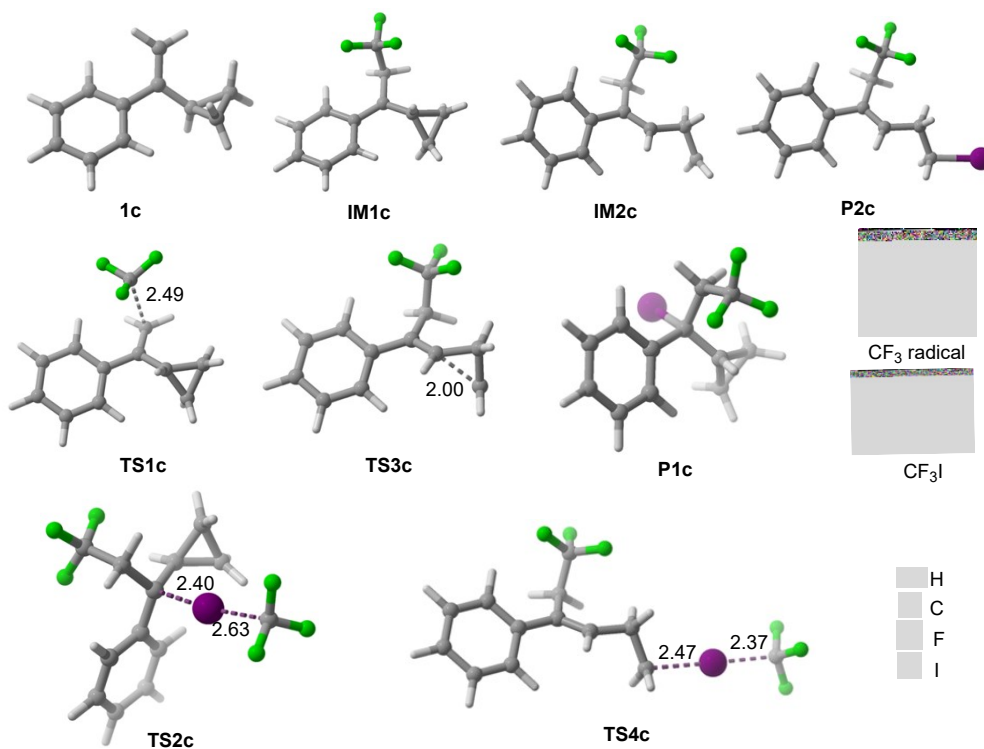

**Figure S5.** Computational Gibbs free energies for the atom transfer radical addition process for the reaction of alpha-cyclopropylstyrene **1c** and CF<sub>3</sub>I. Energies in kcal/mol, interatomic distances are in Å.

The calculated free energy profile for the reaction of alpha-cyclopropylstyrene **1c** and CF<sub>3</sub> radical are listed in Figure S2. First, the addition between **1c** and CF<sub>3</sub> radical forms an intermediate (**IM1c**),

---

which is exothermic by 32.0 kcal/mol. Then, the **IM1c** abstracts the iodine atom of the other CF<sub>3</sub>I molecule to regenerate the CF<sub>3</sub> radical and product **P1c** via transition state **TS2c**. The barrier height of **TS2c** is 25.4 kcal/mol (relative to the **IM1c**), this reaction is endergonic by 13.8 kcal/mol. Alternatively, **IM1c** can isomeric to the intermediate **IM2c** via ring-opening transition state **TS3c** with a barrier of 15.5 kcal/mol (relative to the **IM1c**). The resulting **IM2c** further proceeds iodine atom transfer to generate the product **P2c**. Overall, the formation of product **P2c** is the major path.

## 6. NMR Spectra

$^1\text{H}$  NMR (400 MHz,  $\text{CDCl}_3$ ) of compound **3a**:

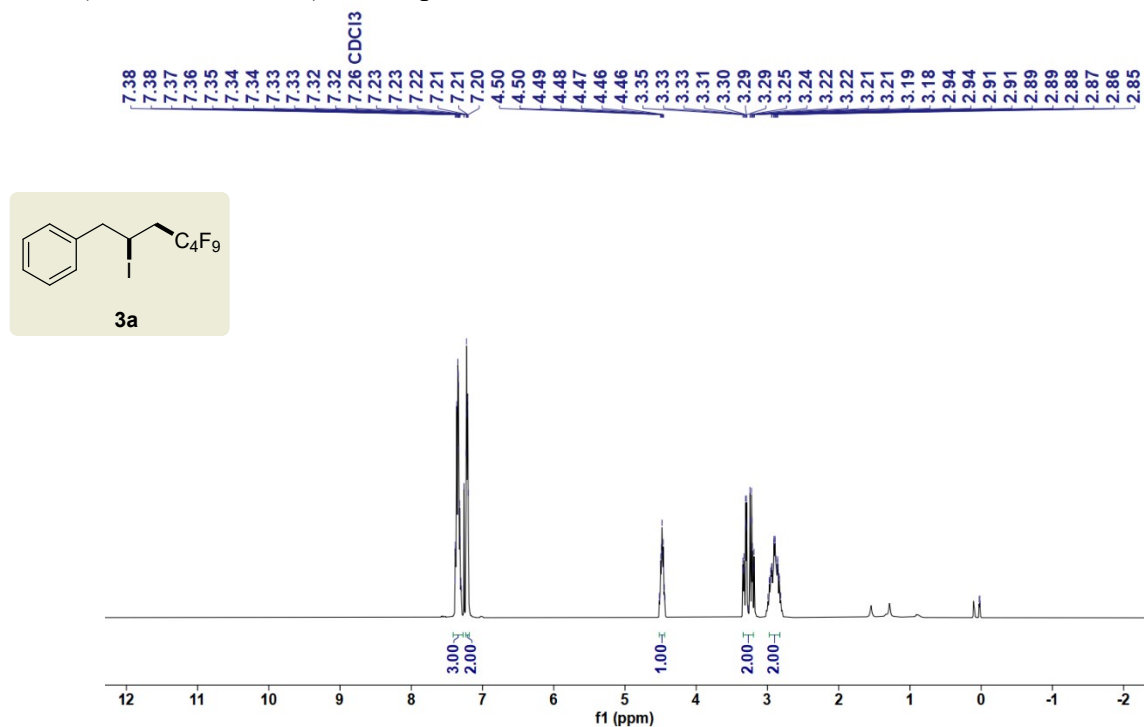

$^{13}\text{C}$  NMR (100 MHz,  $\text{CDCl}_3$ ) of compound **3a**:

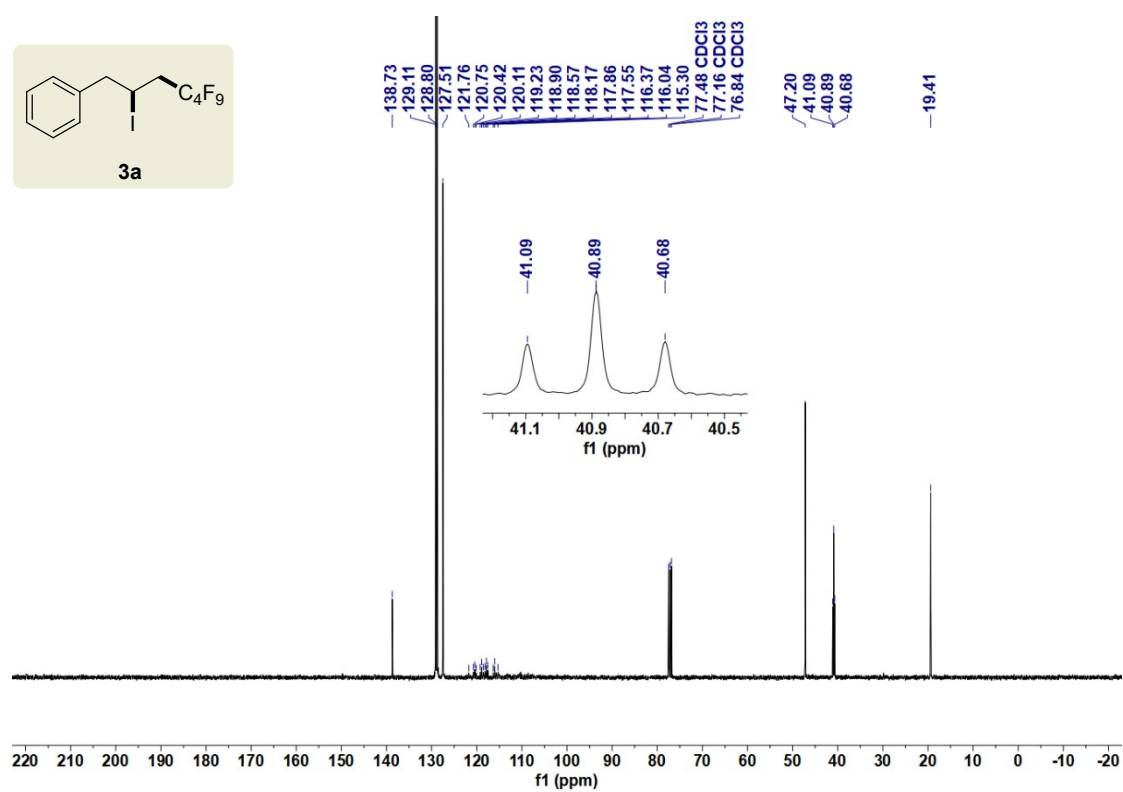

$^{19}\text{F}$  NMR (376 MHz,  $\text{CDCl}_3$ ) of compound **3a**:

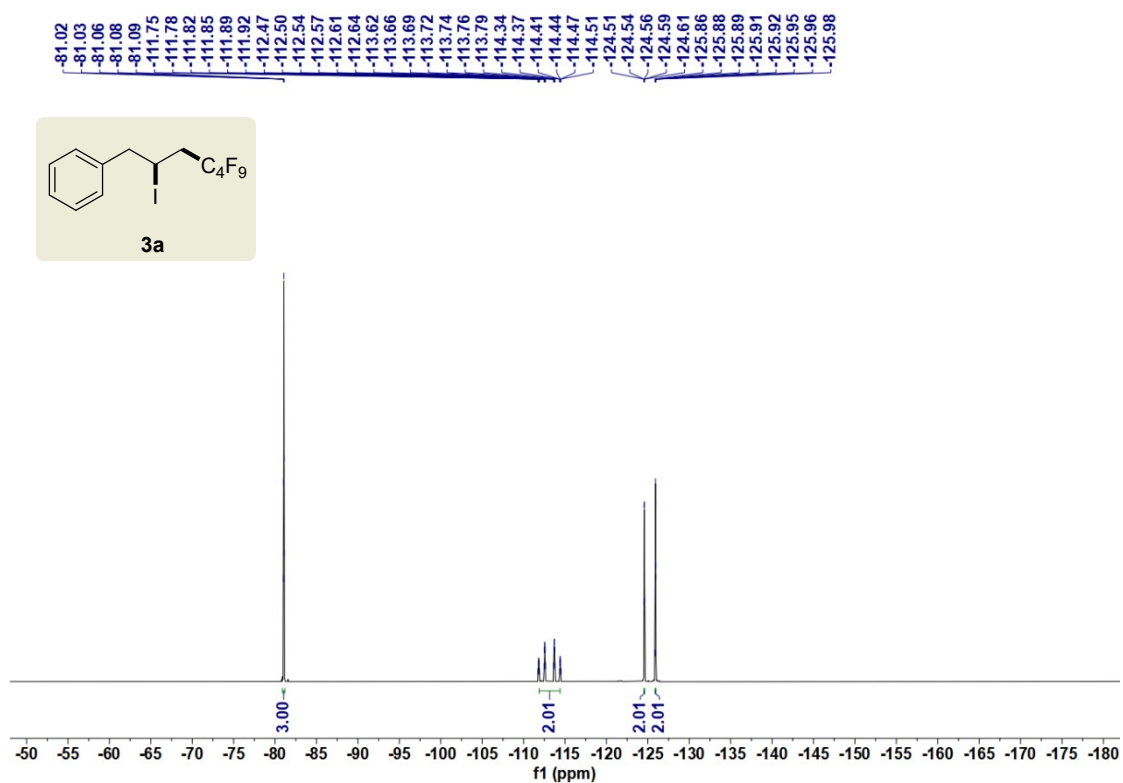

$^1\text{H}$  NMR (400 MHz,  $\text{CDCl}_3$ ) of compound **3c**:

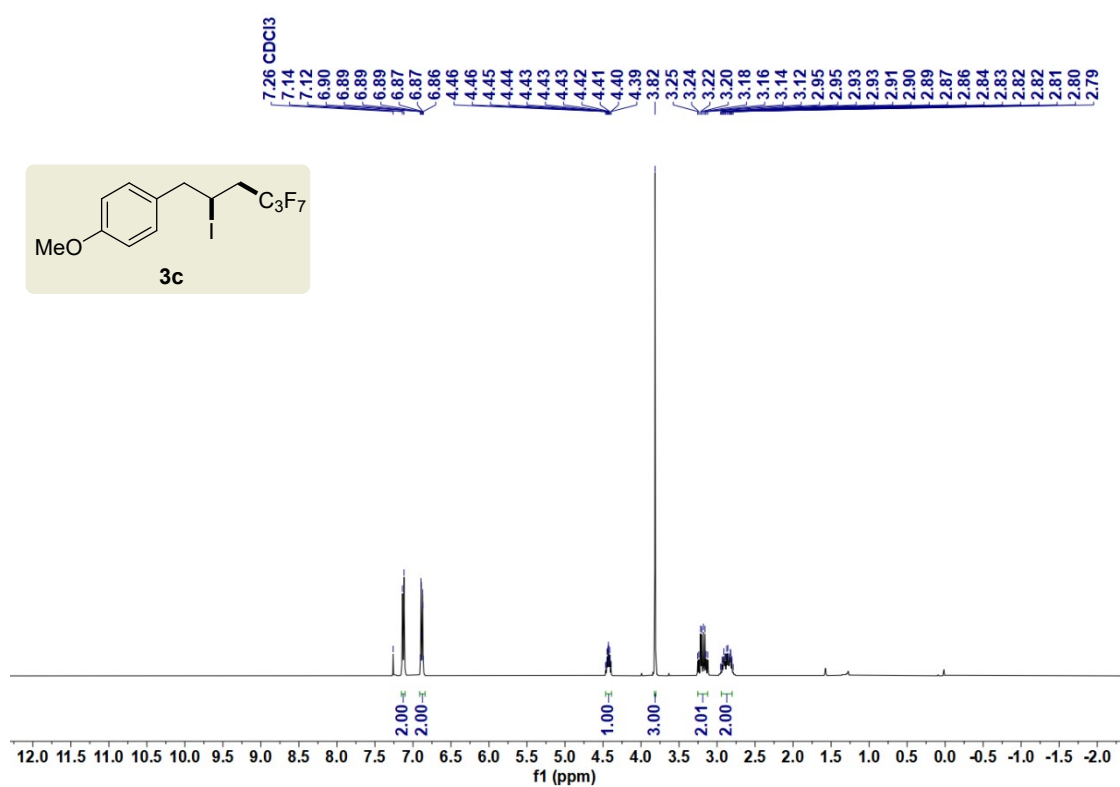



$^{13}\text{C}$  NMR (100 MHz,  $\text{CDCl}_3$ ) of compound **3c**:

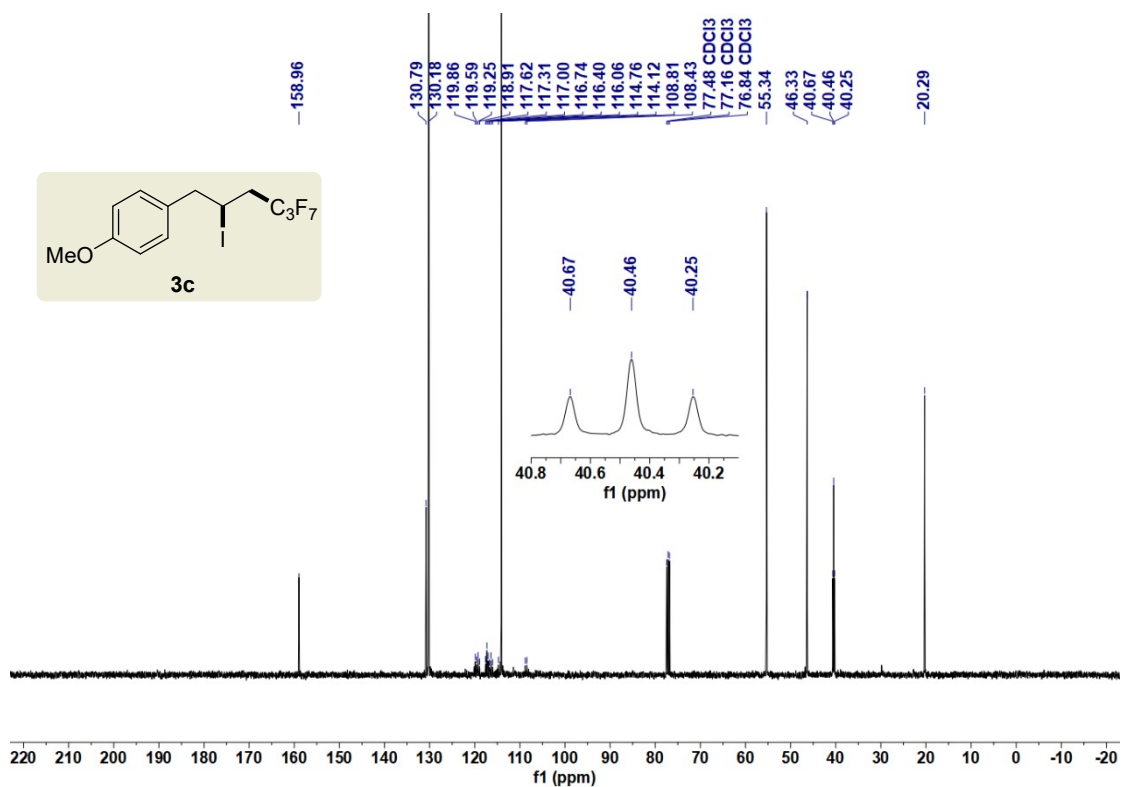

$^{19}\text{F}$  NMR (376 MHz,  $\text{CDCl}_3$ ) of compound **3c**:

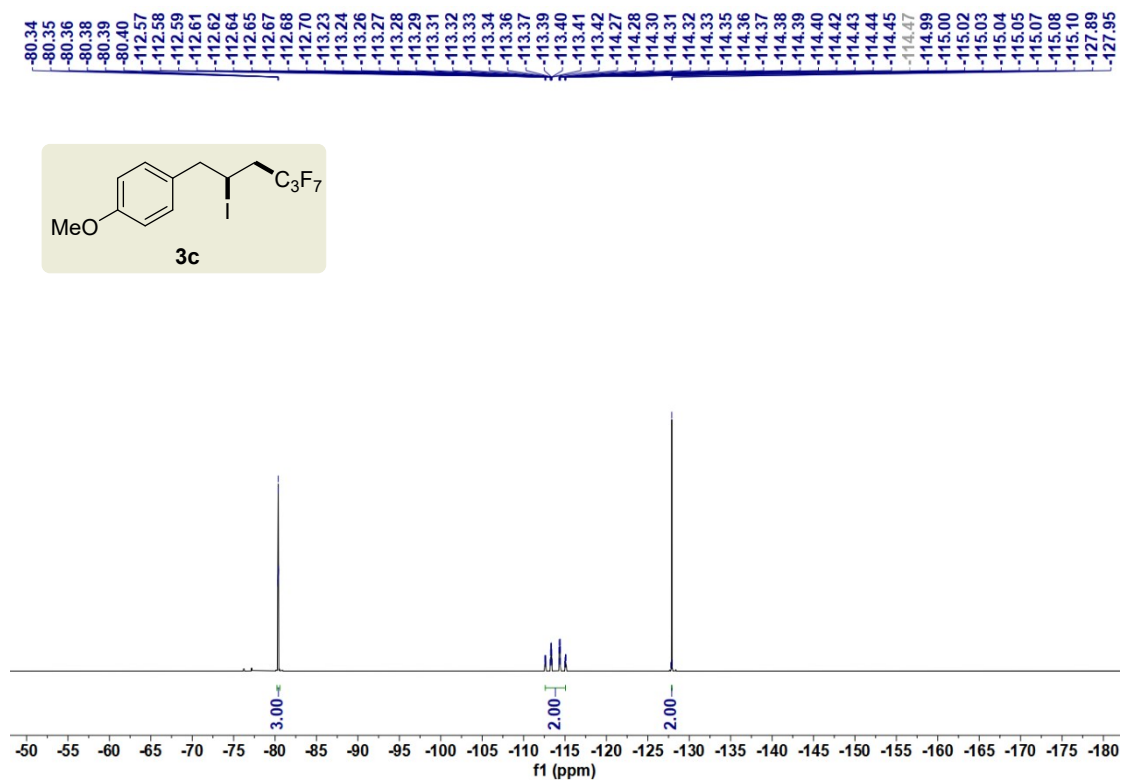

$^1\text{H}$  NMR (400 MHz,  $\text{CDCl}_3$ ) of compound **3d**:

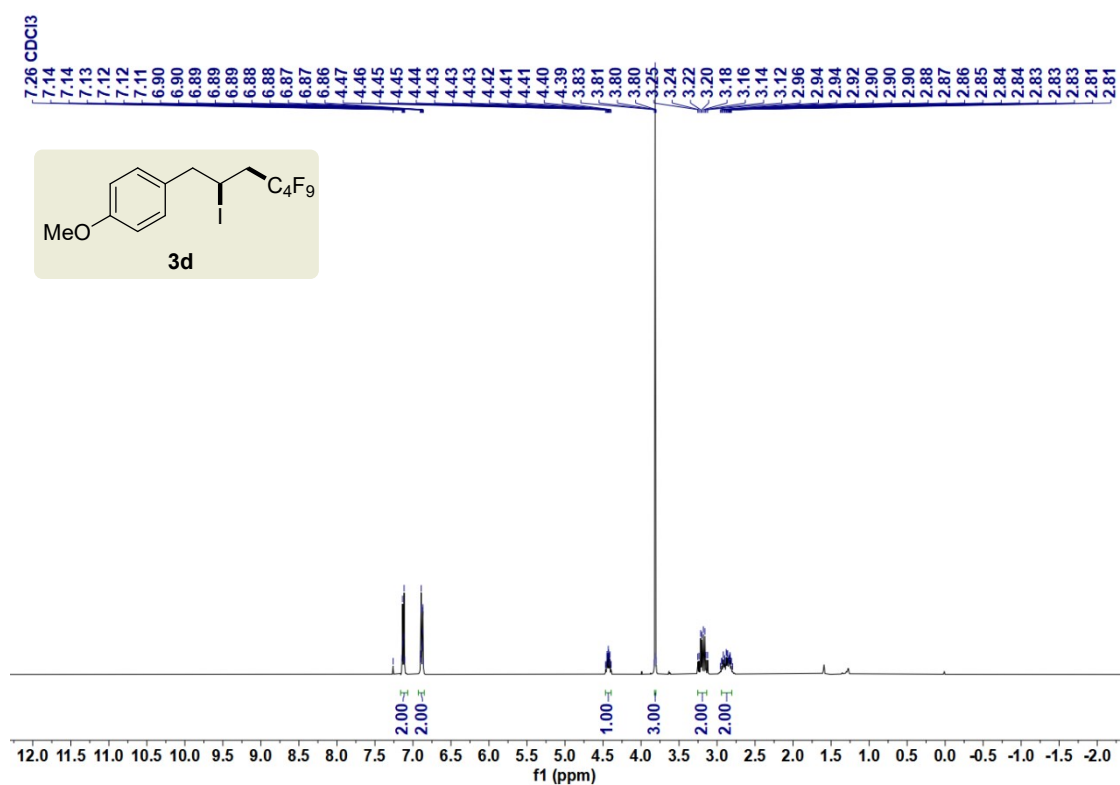

$^{13}\text{C}$  NMR (100 MHz,  $\text{CDCl}_3$ ) of compound **3d**:

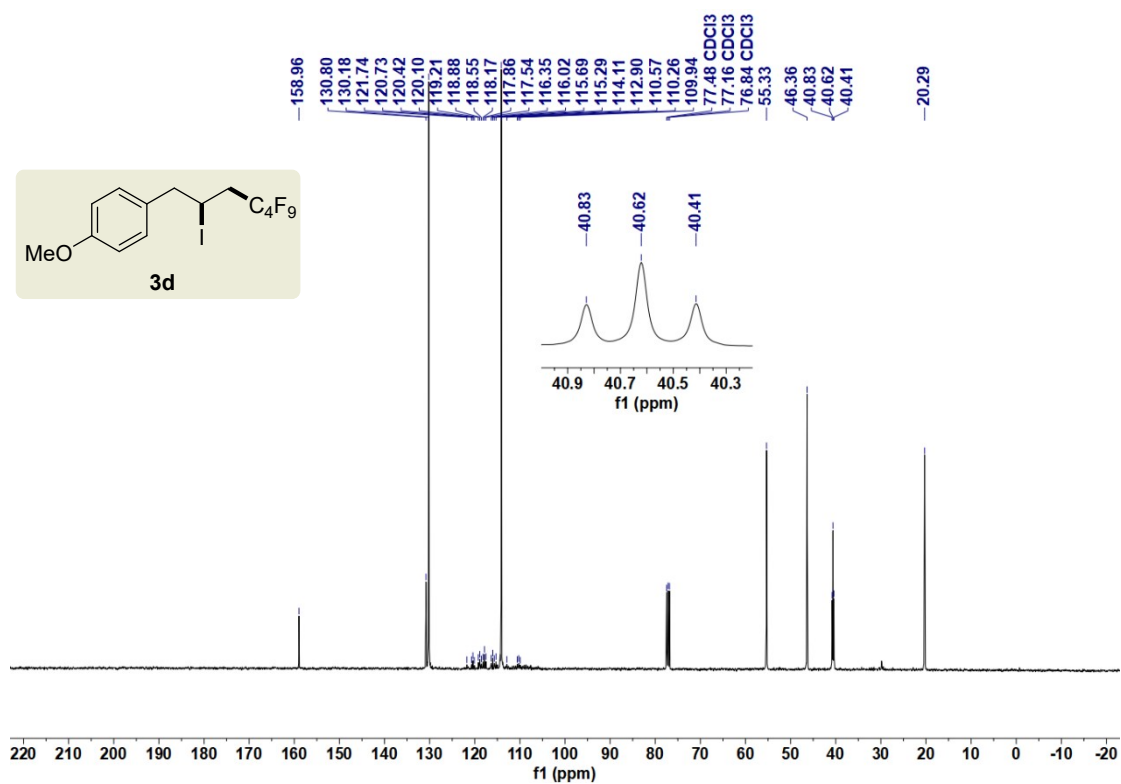

$^{19}\text{F}$  NMR (376 MHz,  $\text{CDCl}_3$ ) of compound **3d**:

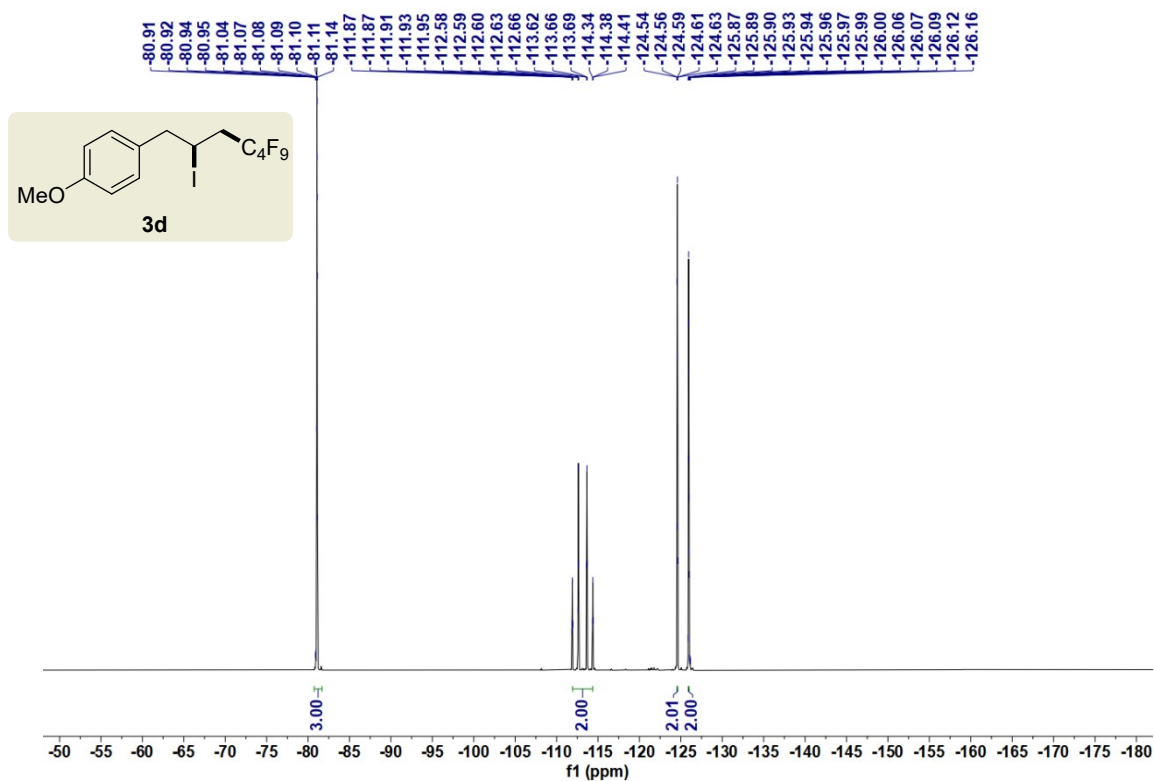

$^1\text{H}$  NMR (400 MHz,  $\text{CDCl}_3$ ) of compound **3e**:

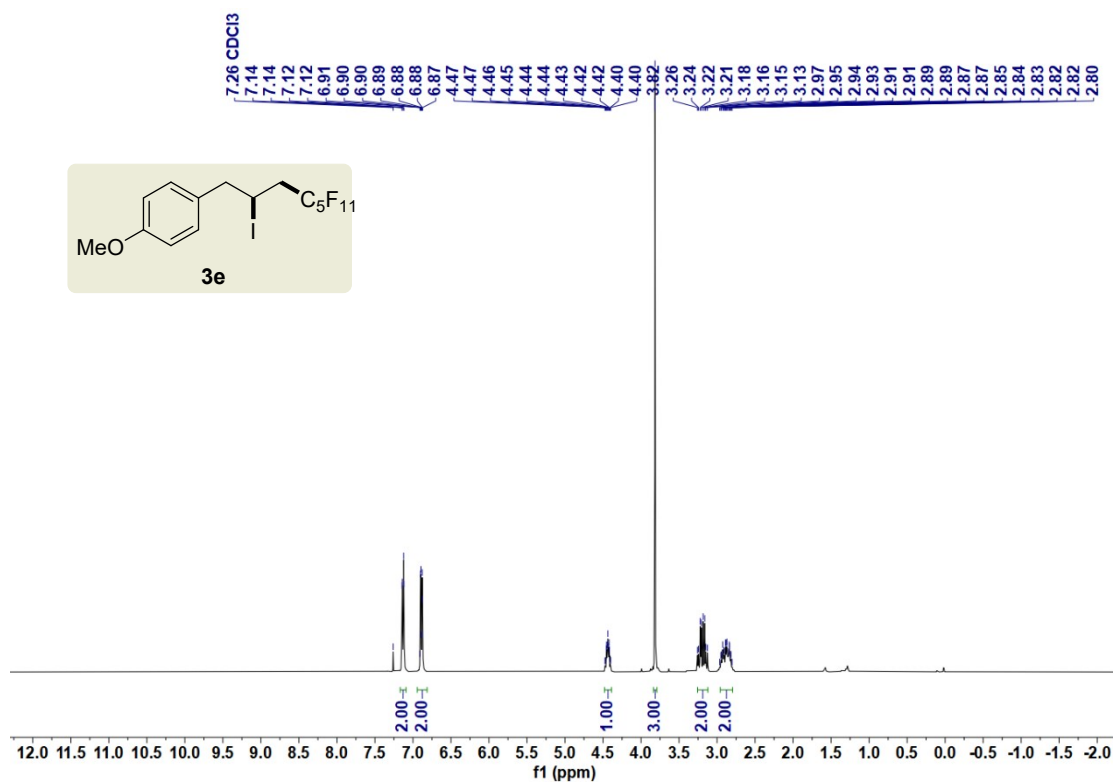

$^{13}\text{C}$  NMR (100 MHz,  $\text{CDCl}_3$ ) of compound **3e**:

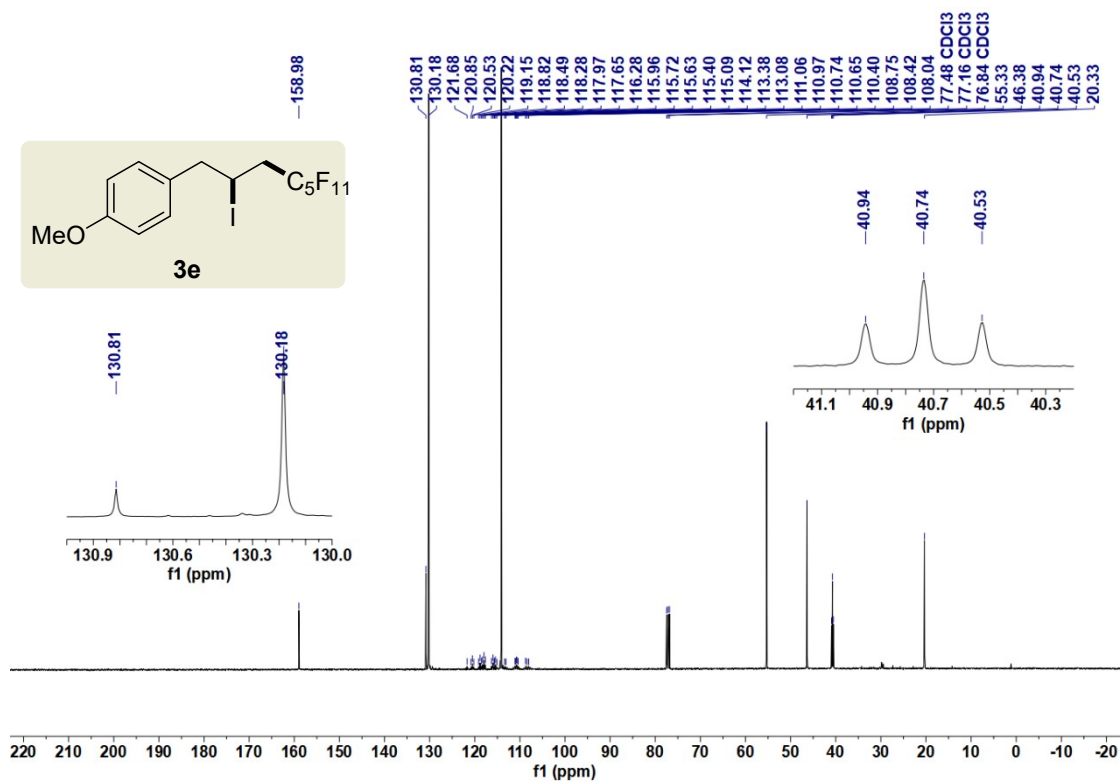

$^{19}\text{F}$  NMR (376 MHz,  $\text{CDCl}_3$ ) of compound **3e**:

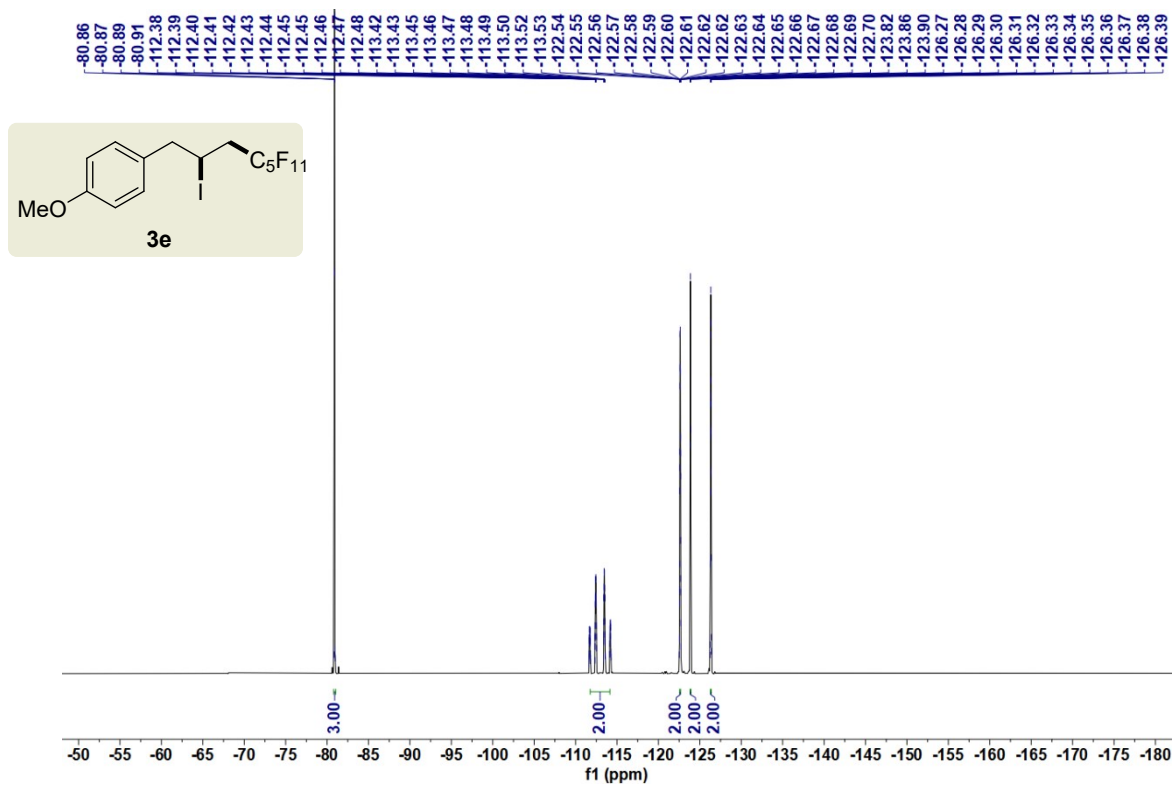



$^{19}\text{F}$  NMR (376 MHz,  $\text{CDCl}_3$ ) of compound **3f**:

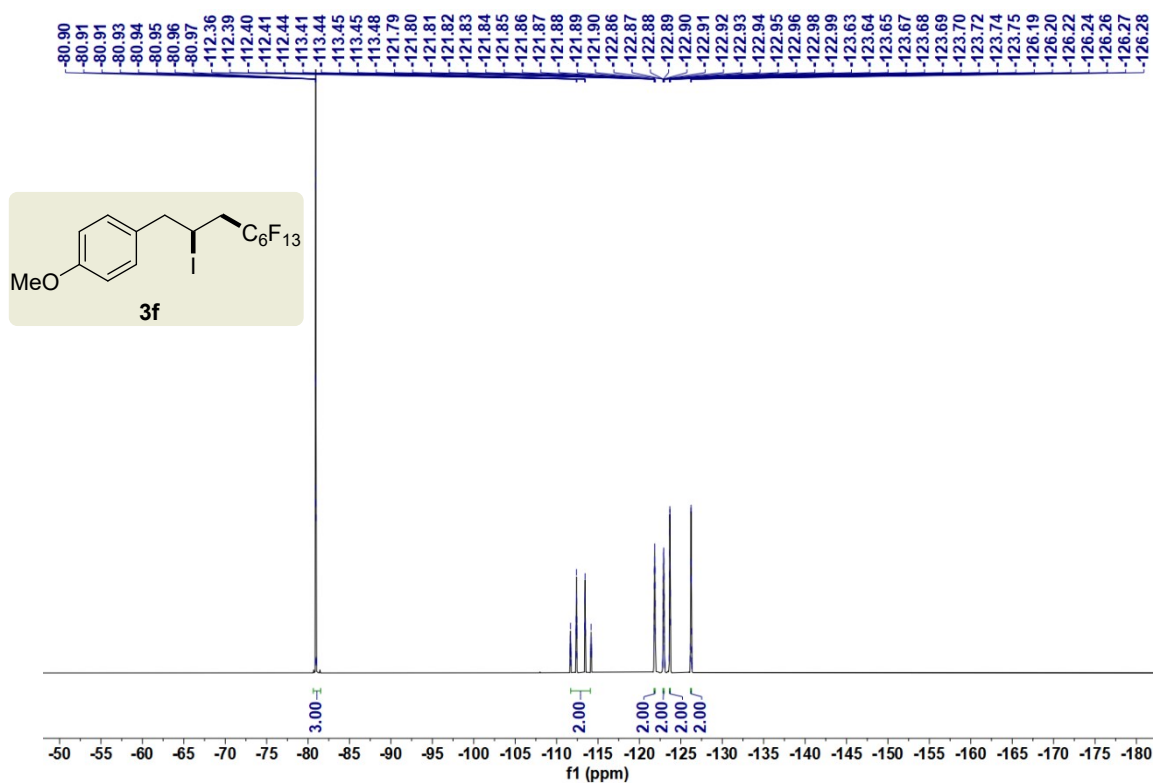

$^1\text{H}$  NMR (400 MHz,  $\text{CDCl}_3$ ) of compound **3g**:

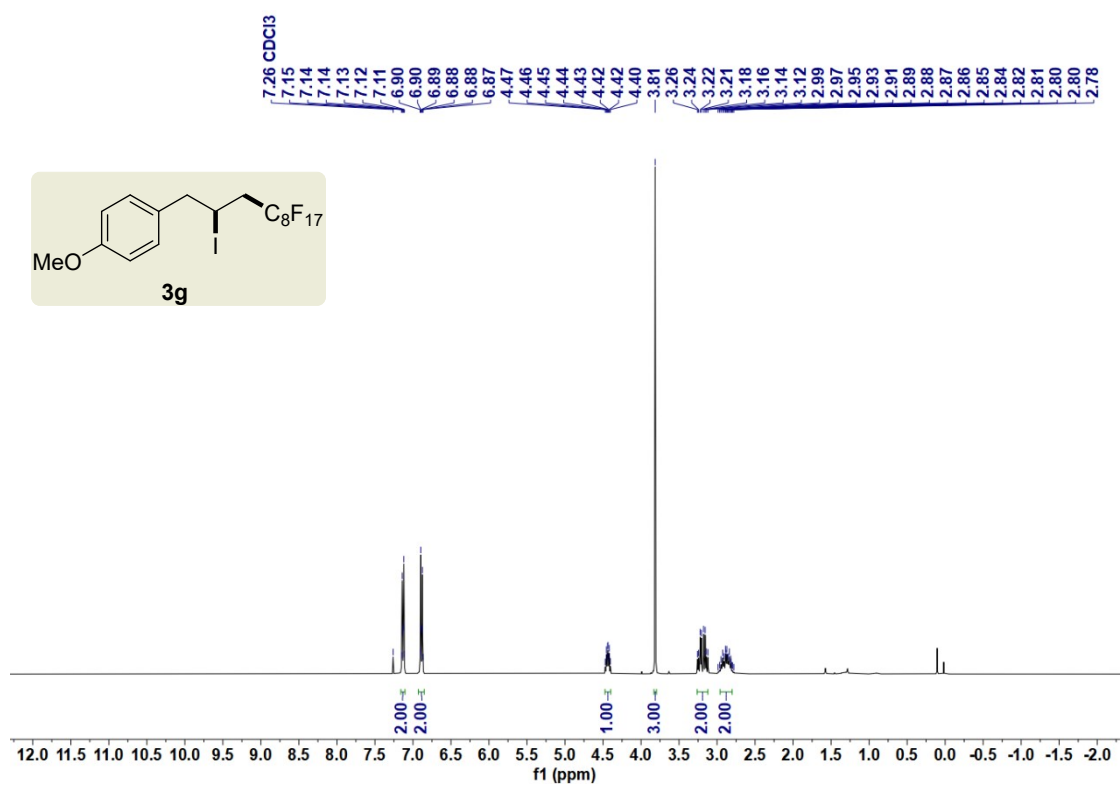

$^{13}\text{C}$  NMR (100 MHz,  $\text{CDCl}_3$ ) of compound **3g**:

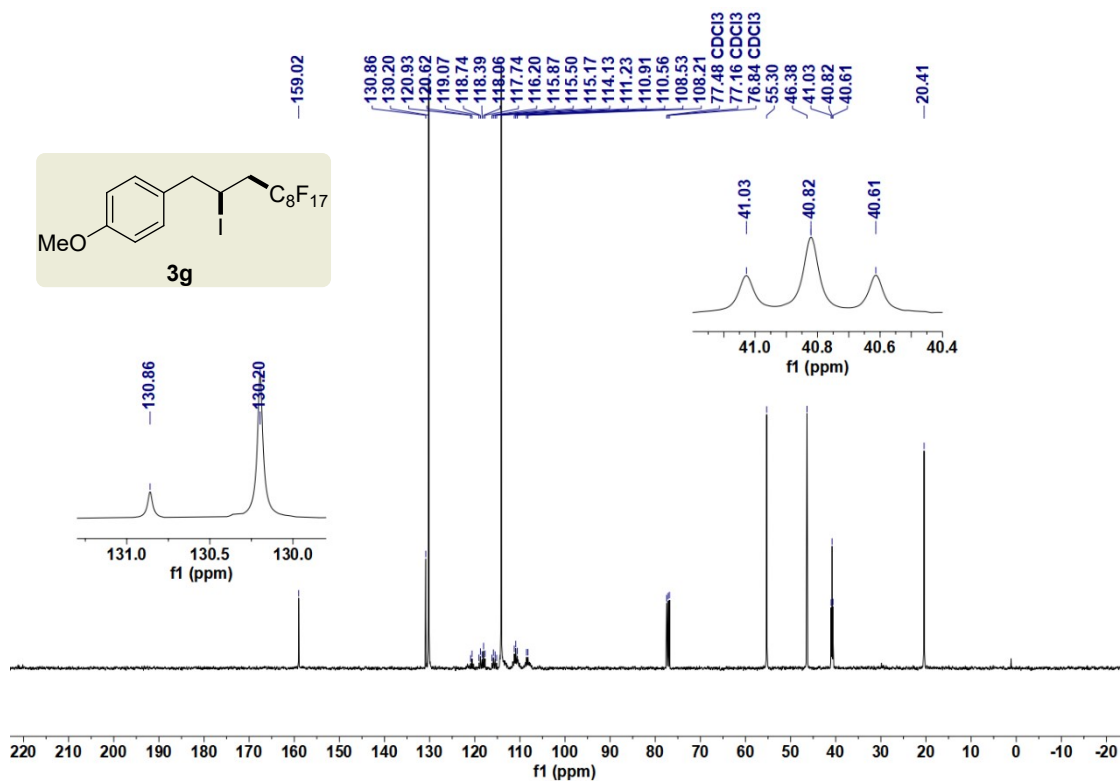

$^{19}\text{F}$  NMR (376 MHz,  $\text{CDCl}_3$ ) of compound **3g**:

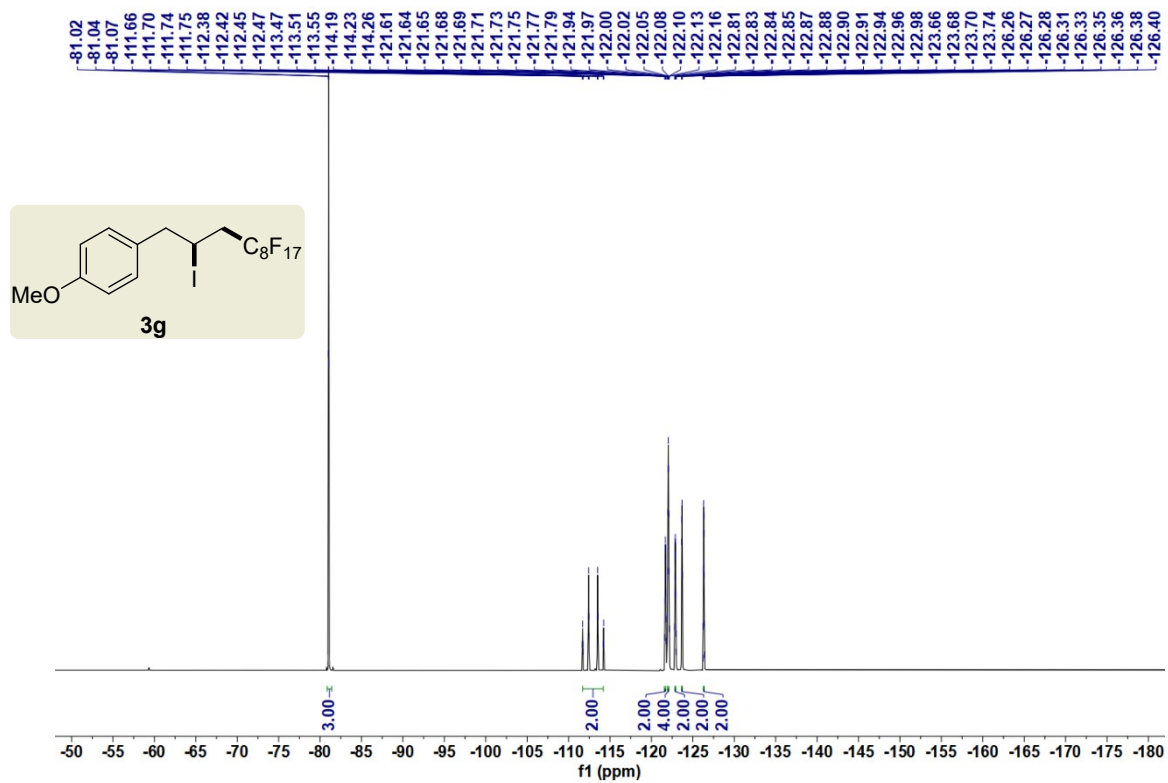

$^1\text{H}$  NMR (400 MHz,  $\text{CDCl}_3$ ) of compound **3h**:

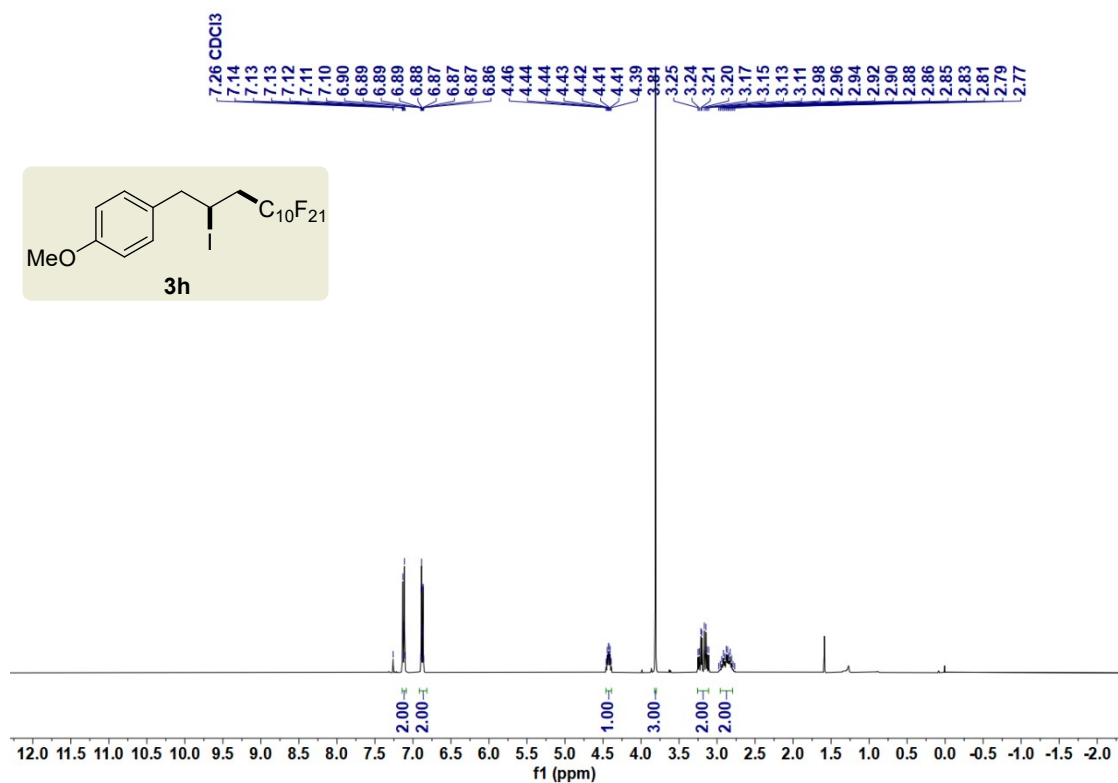

$^{13}\text{C}$  NMR (100 MHz,  $\text{CDCl}_3$ ) of compound **3h**:

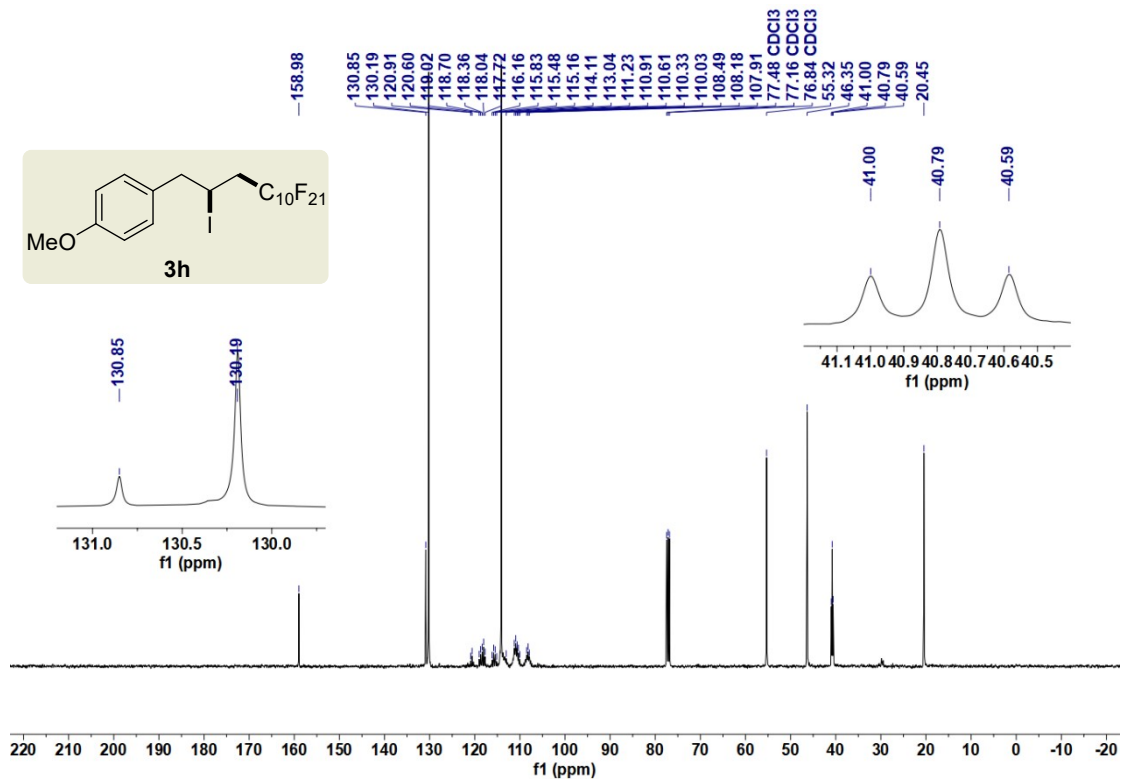



$^{19}\text{F}$  NMR (376 MHz,  $\text{CDCl}_3$ ) of compound **3h**:

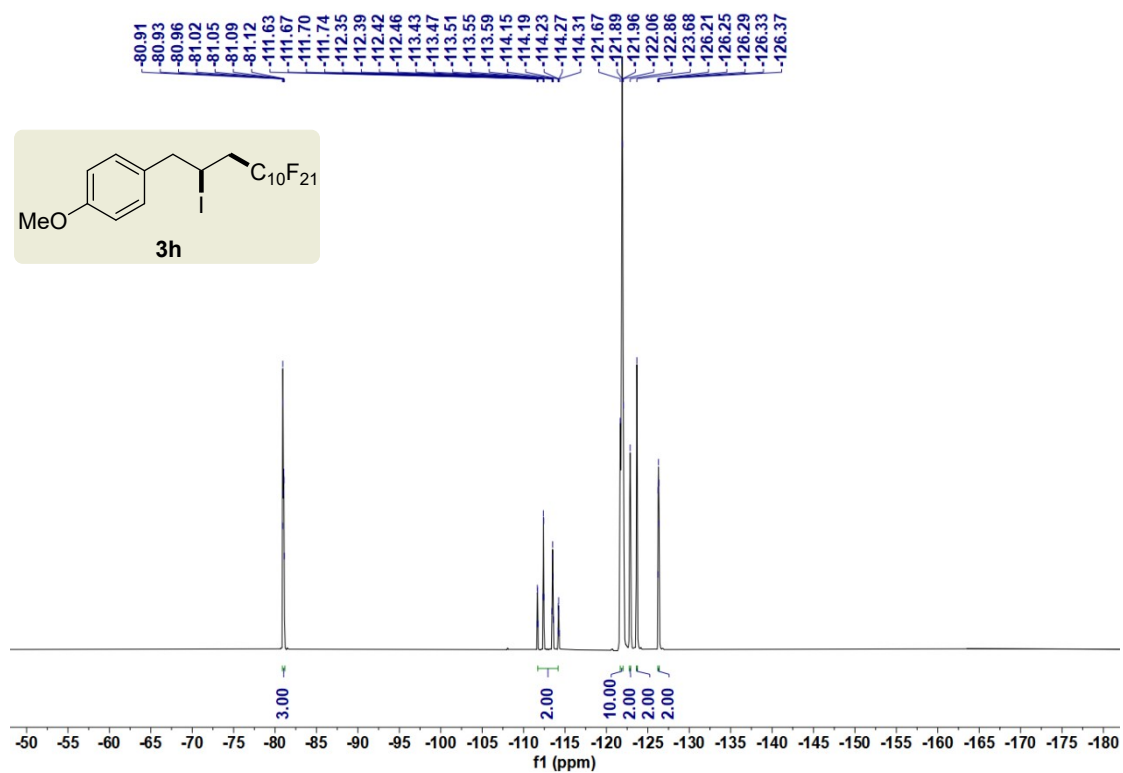

$^1\text{H}$  NMR (400 MHz,  $\text{CDCl}_3$ ) of compound **3i**:

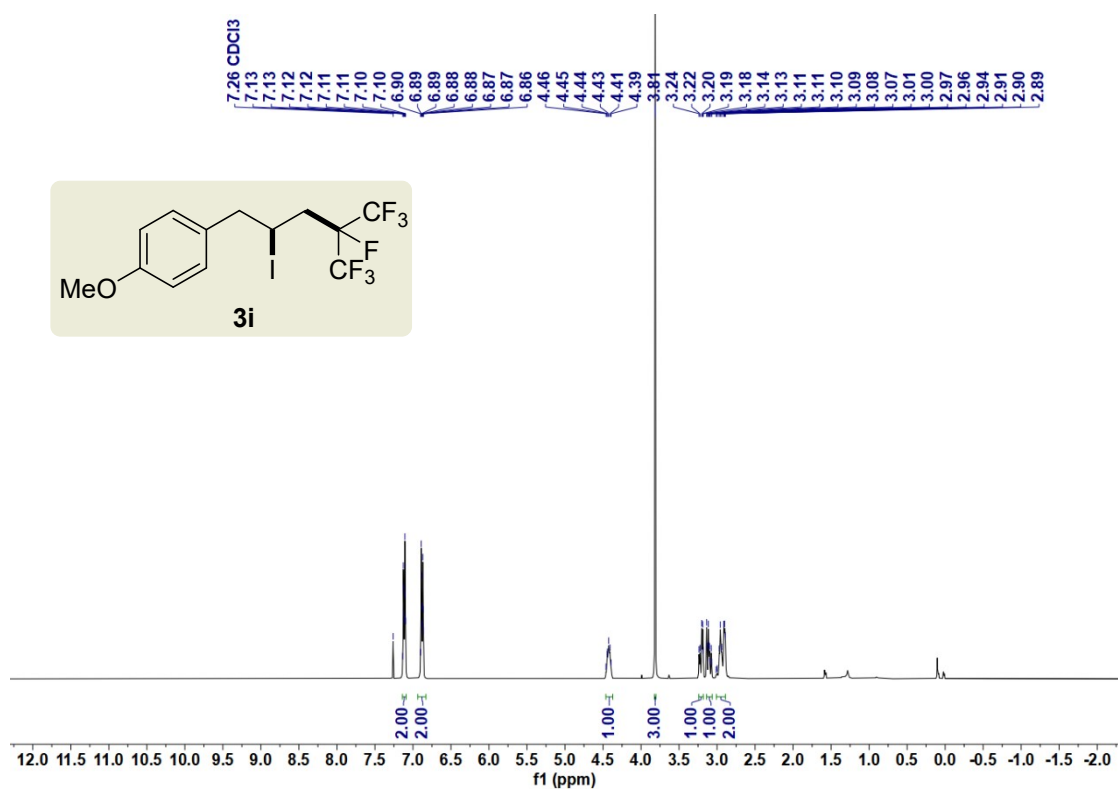

$^{13}\text{C}$  NMR (100 MHz,  $\text{CDCl}_3$ ) of compound **3i**:

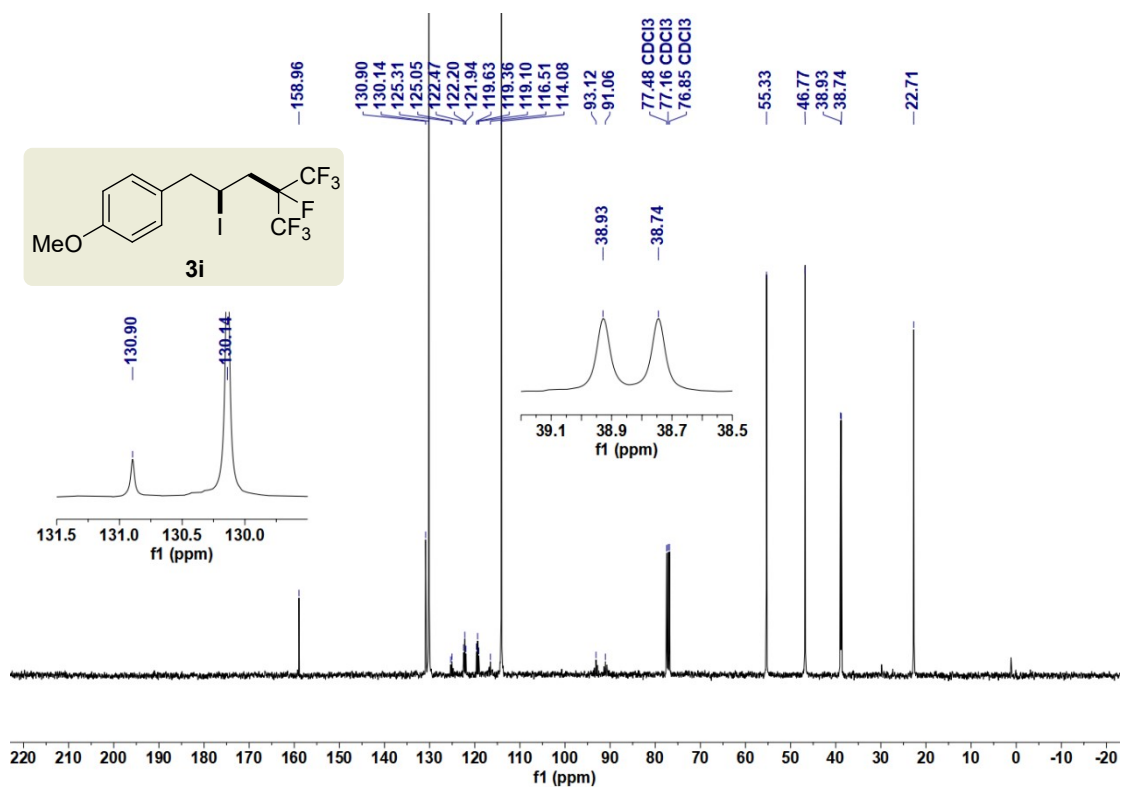

$^{19}\text{F}$  NMR (376 MHz,  $\text{CDCl}_3$ ) of compound **3i**:

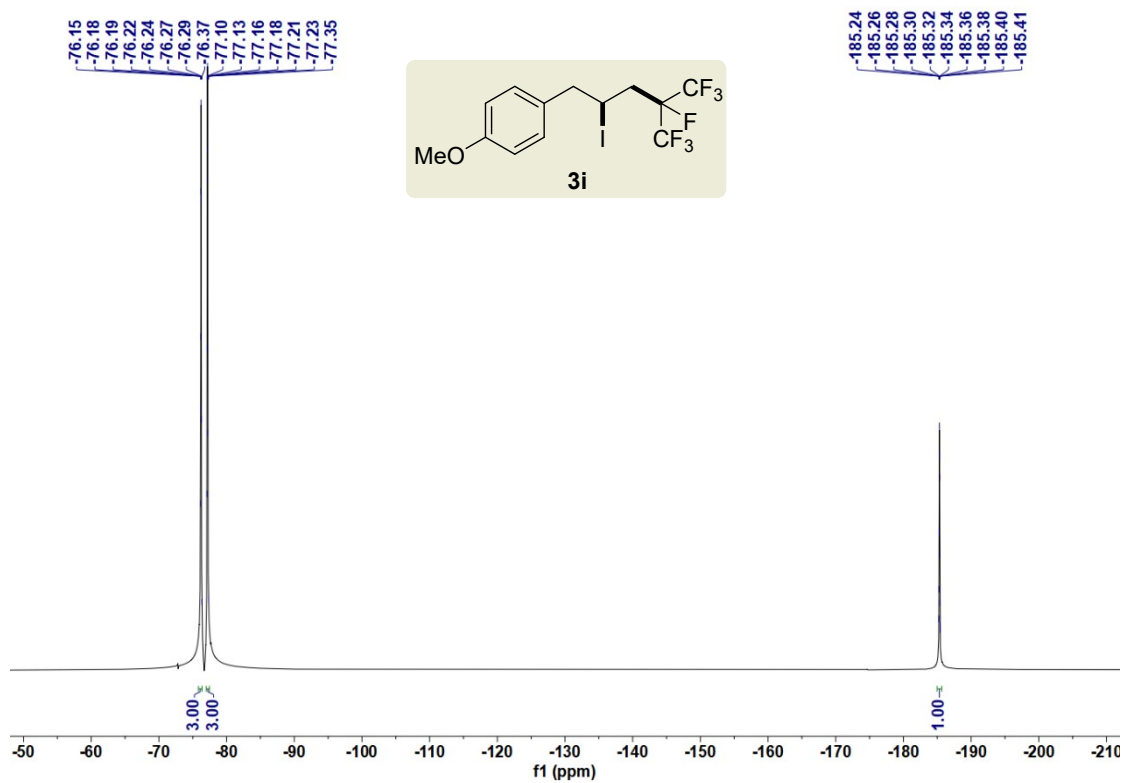

$^1\text{H}$  NMR (400 MHz,  $\text{CDCl}_3$ ) of compound **3j**:

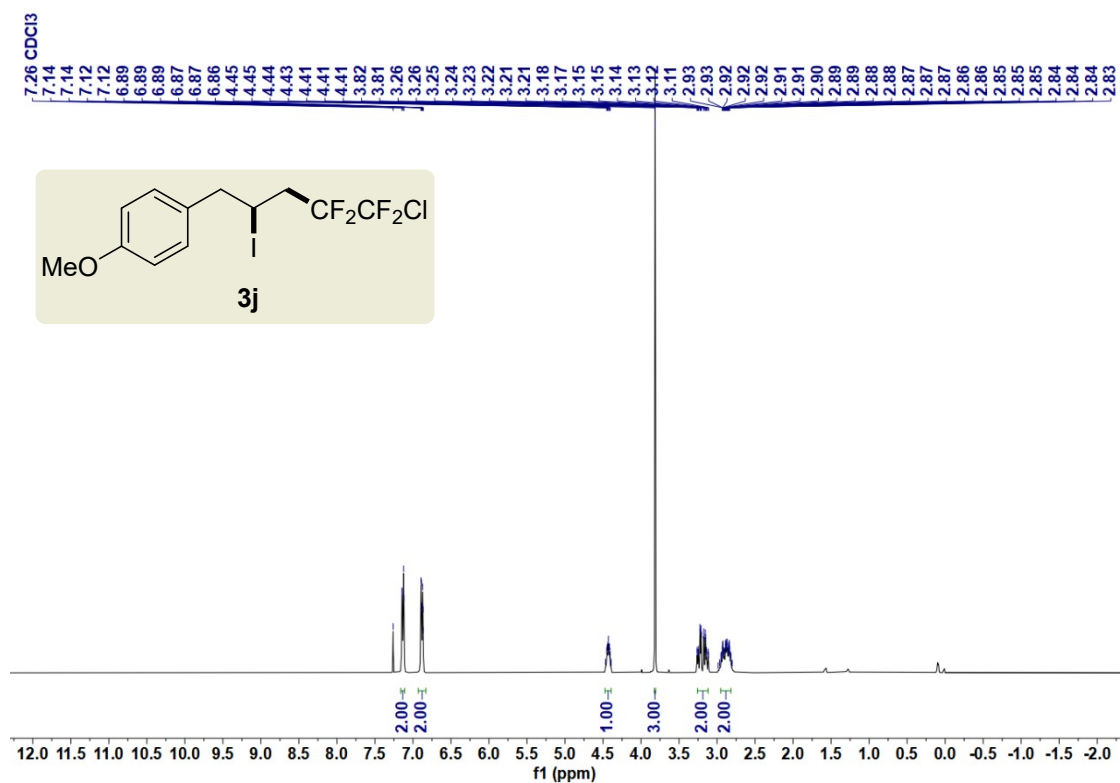

$^{13}\text{C}$  NMR (100 MHz,  $\text{CDCl}_3$ ) of compound **3j**:

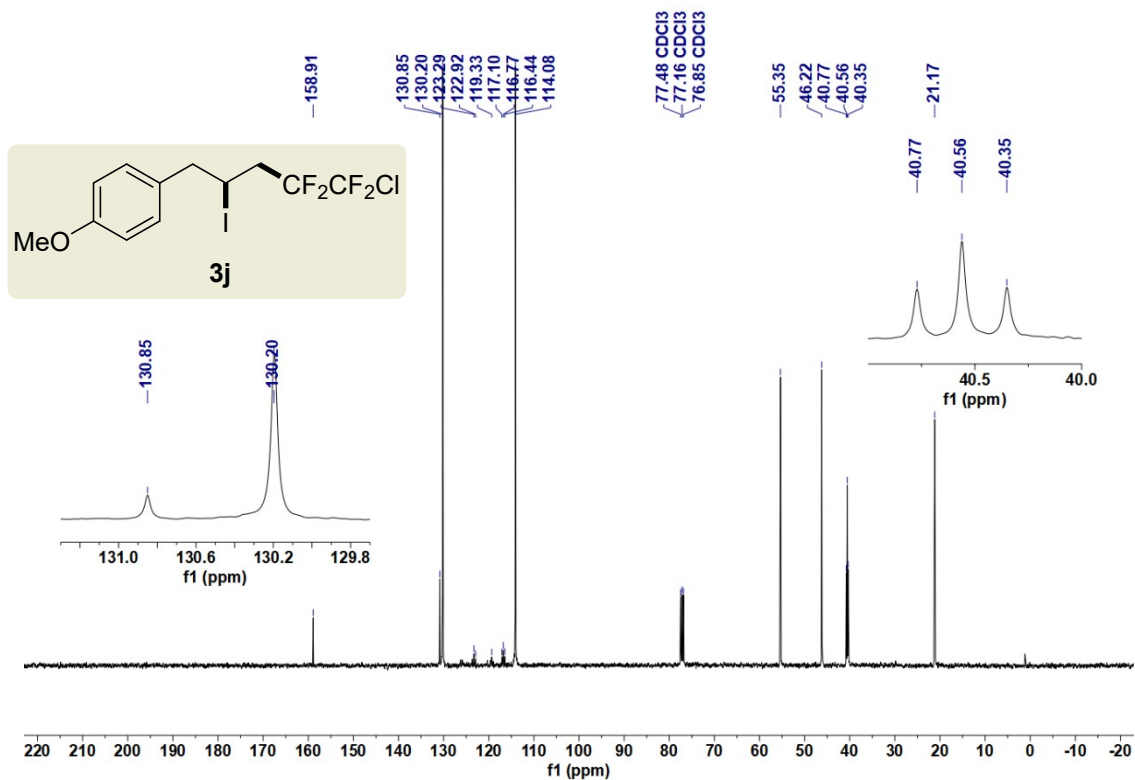

$^{19}\text{F}$  NMR (376 MHz,  $\text{CDCl}_3$ ) of compound **3j**:

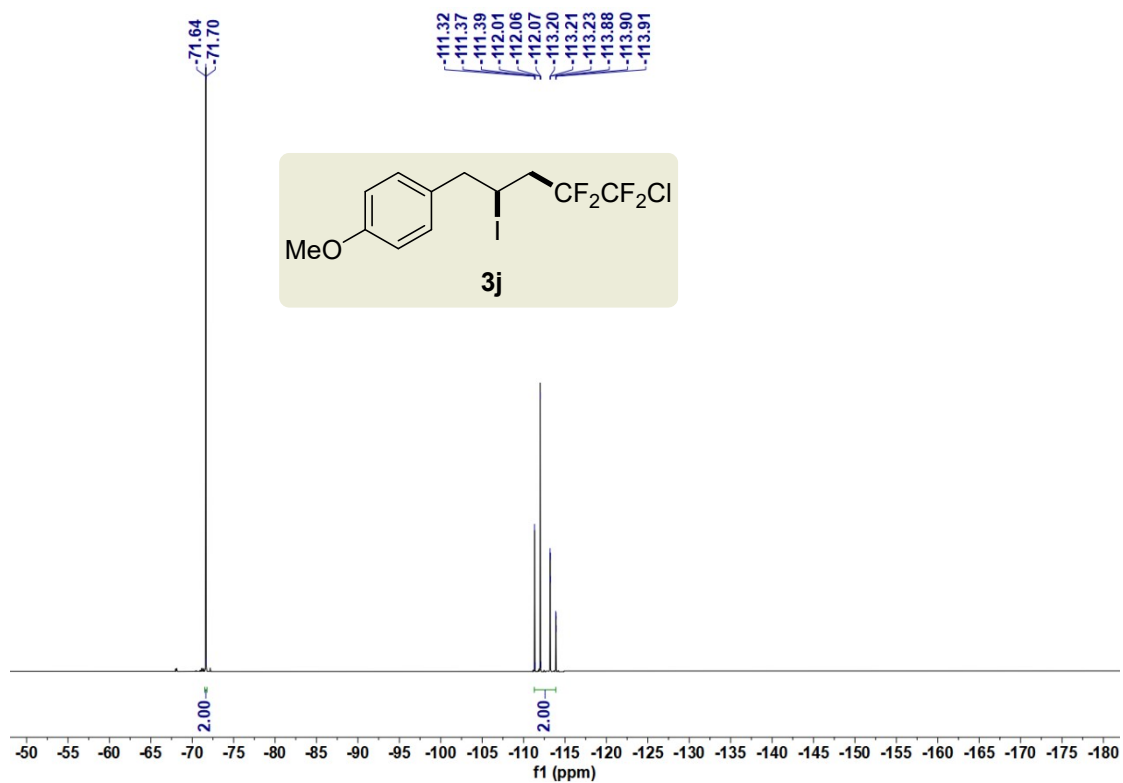

$^1\text{H}$  NMR (400 MHz,  $\text{CDCl}_3$ ) of compound **3k**:

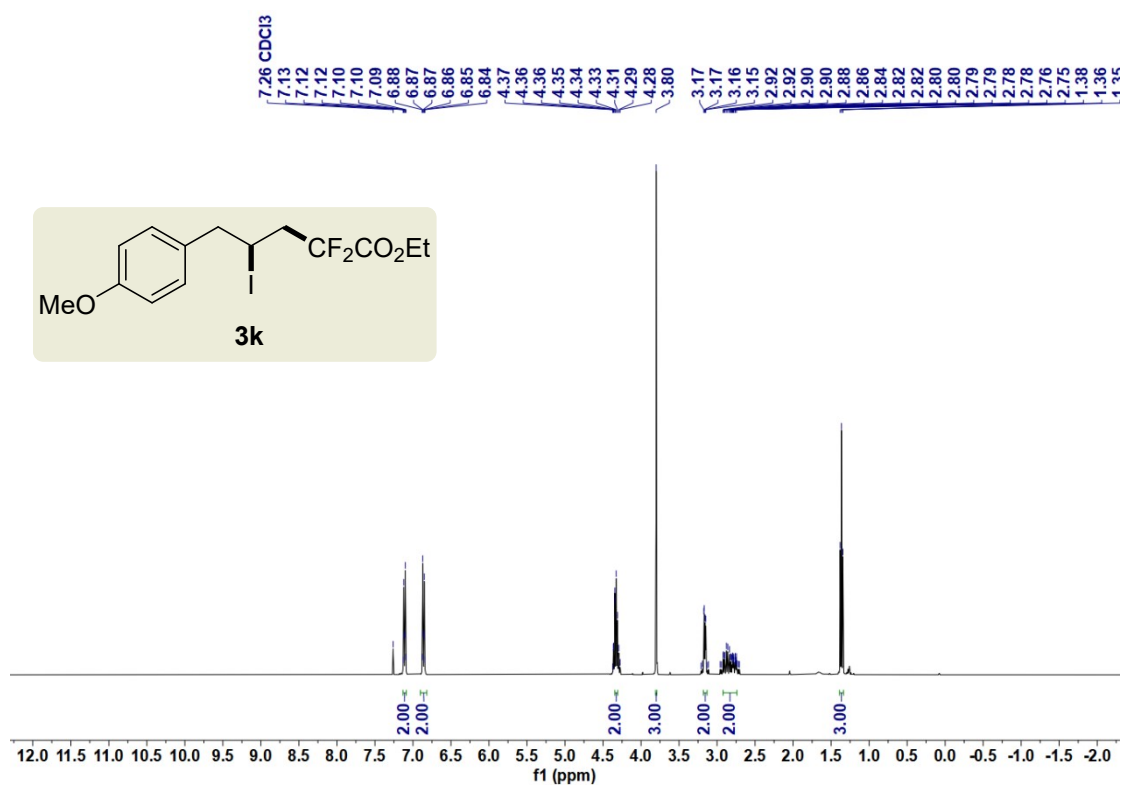

$^{13}\text{C}$  NMR (100 MHz,  $\text{CDCl}_3$ ) of compound **3k**:

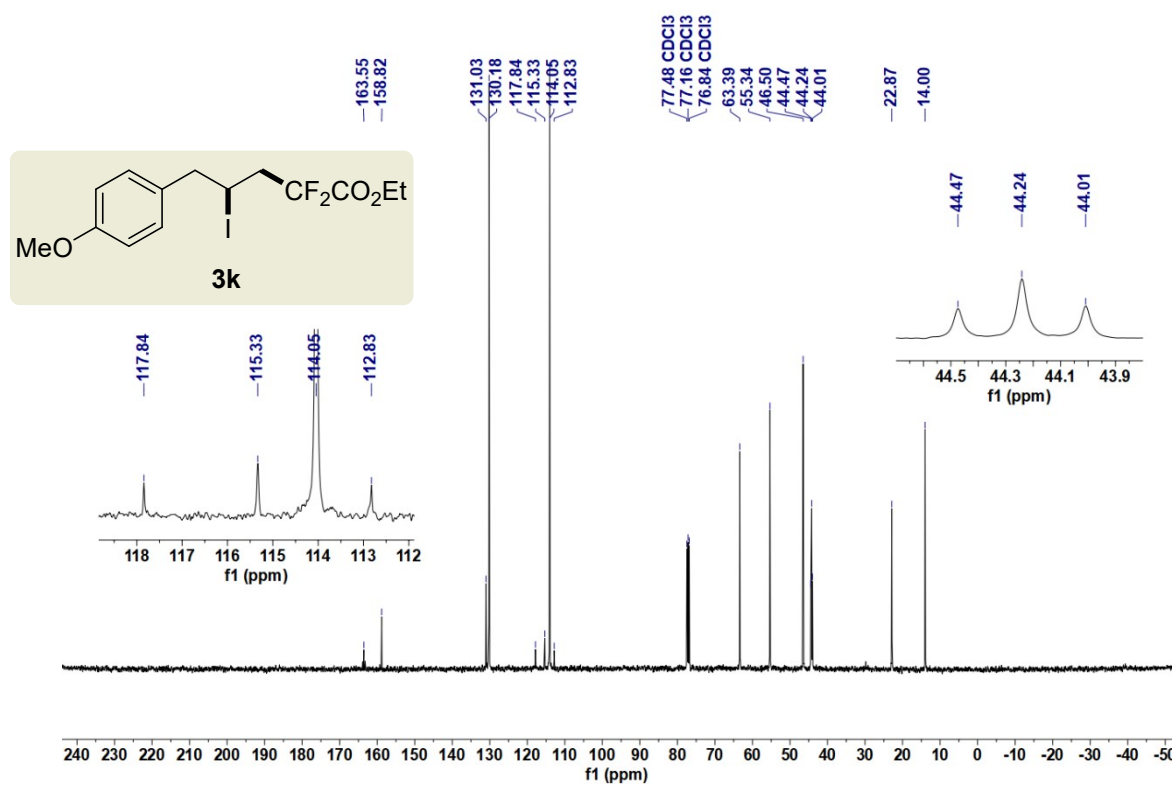

$^{19}\text{F}$  NMR (376 MHz,  $\text{CDCl}_3$ ) of compound **3k**:

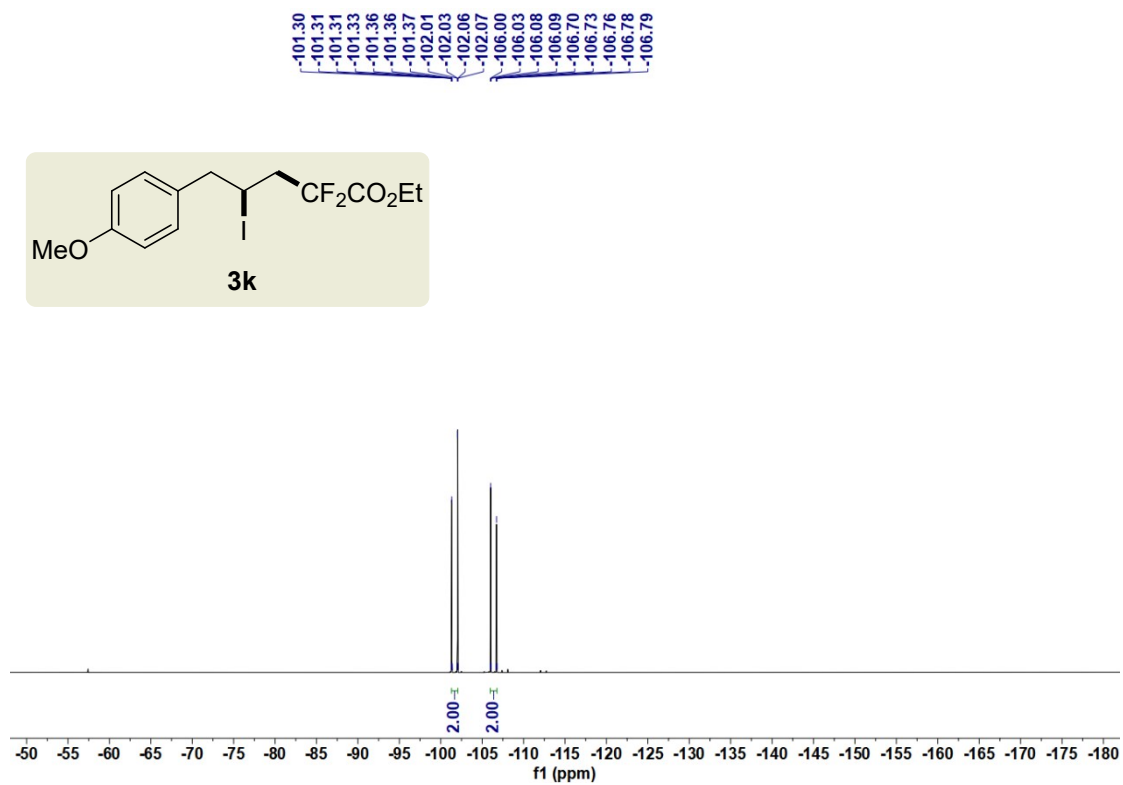

$^1\text{H}$  NMR (400 MHz,  $\text{CDCl}_3$ ) of compound **6a**:

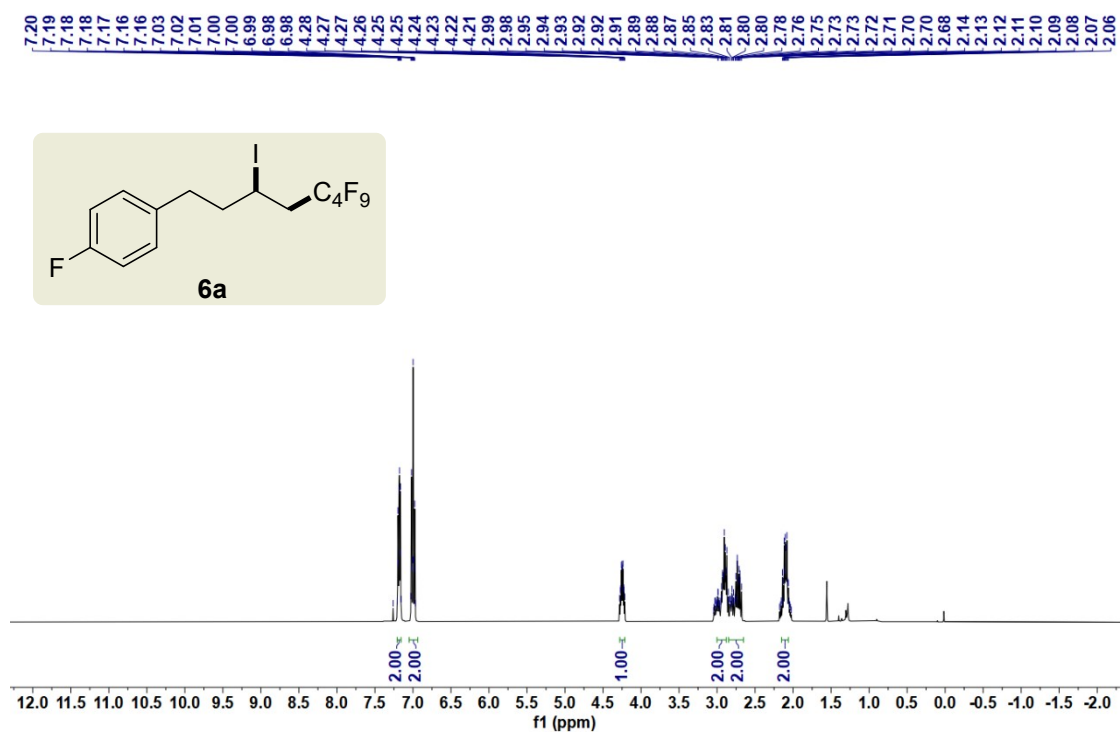

$^{13}\text{C}$  NMR (100 MHz,  $\text{CDCl}_3$ ) of compound **6a**:

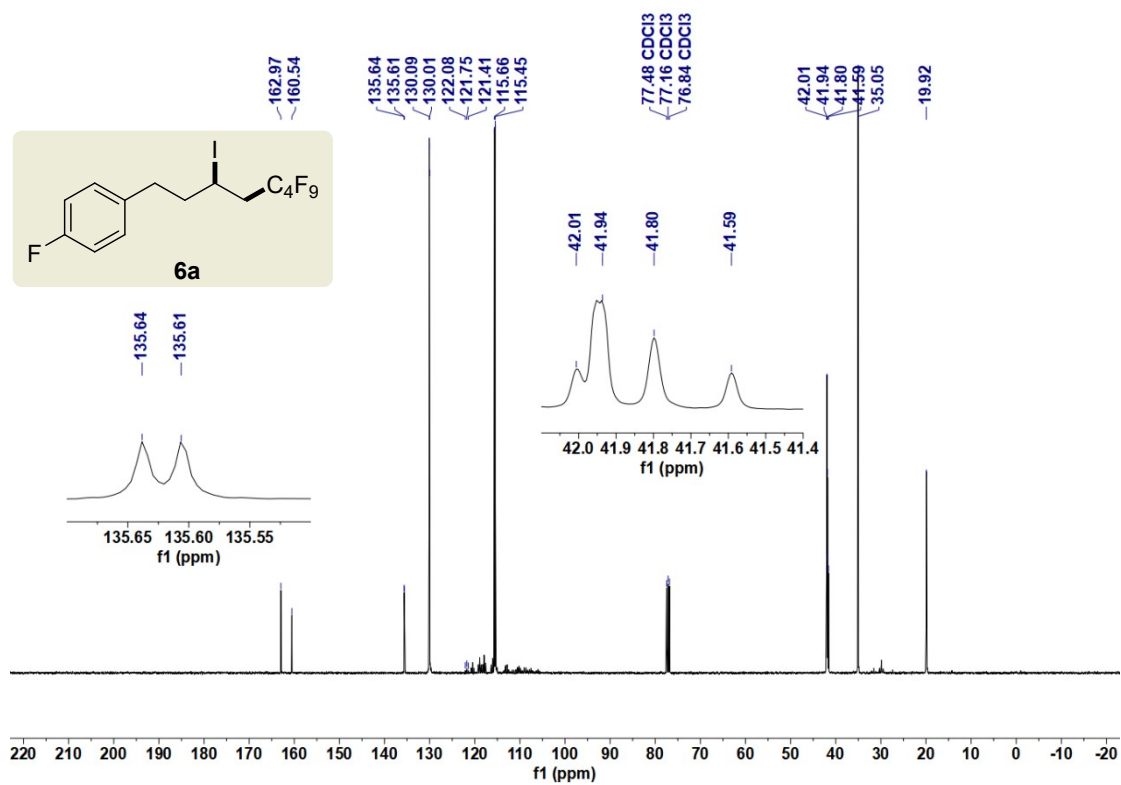

$^{19}\text{F}$  NMR (376 MHz,  $\text{CDCl}_3$ ) of compound **6a**:

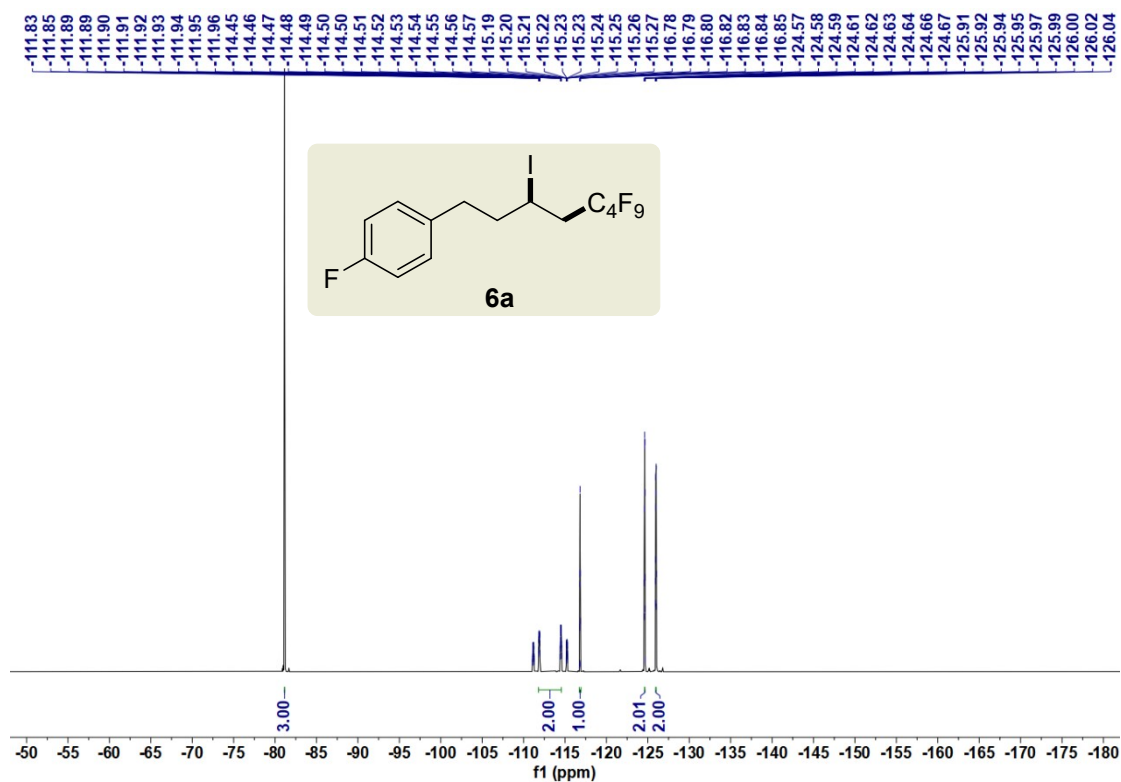

$^1\text{H}$  NMR (400 MHz,  $\text{CDCl}_3$ ) of compound **6b**:

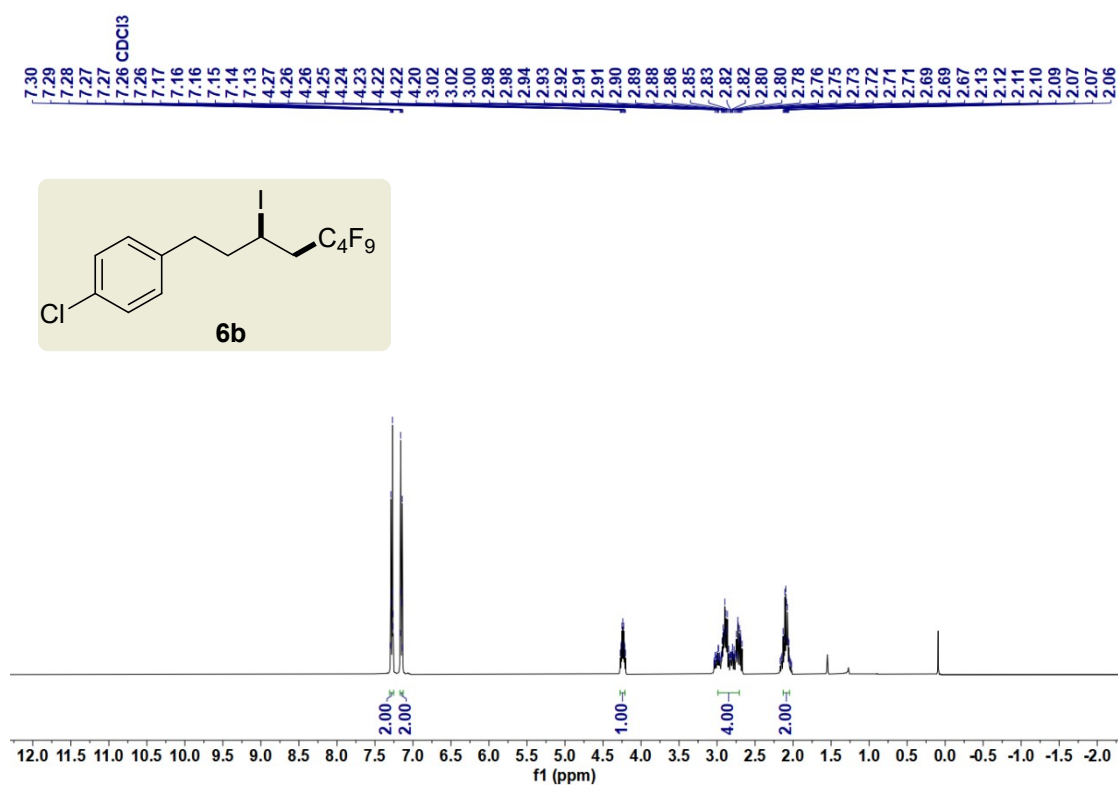

$^{13}\text{C}$  NMR (100 MHz,  $\text{CDCl}_3$ ) of compound **6b**:

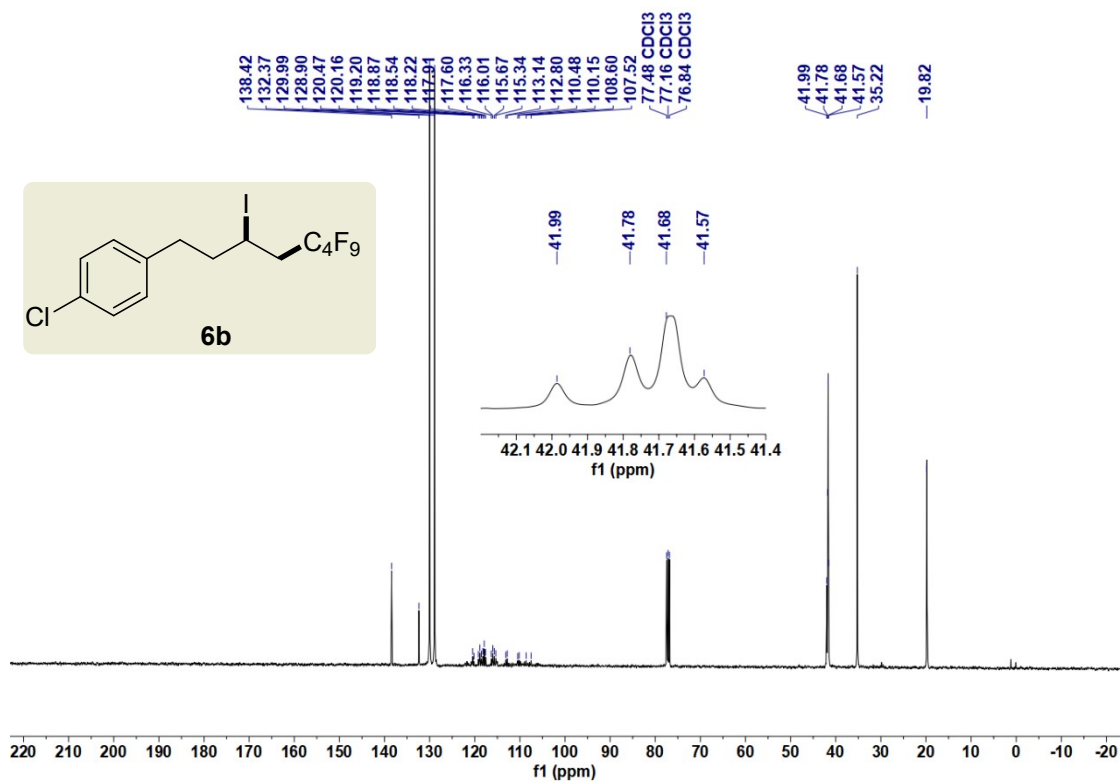

$^{19}\text{F}$  NMR (376 MHz,  $\text{CDCl}_3$ ) of compound **6b**:

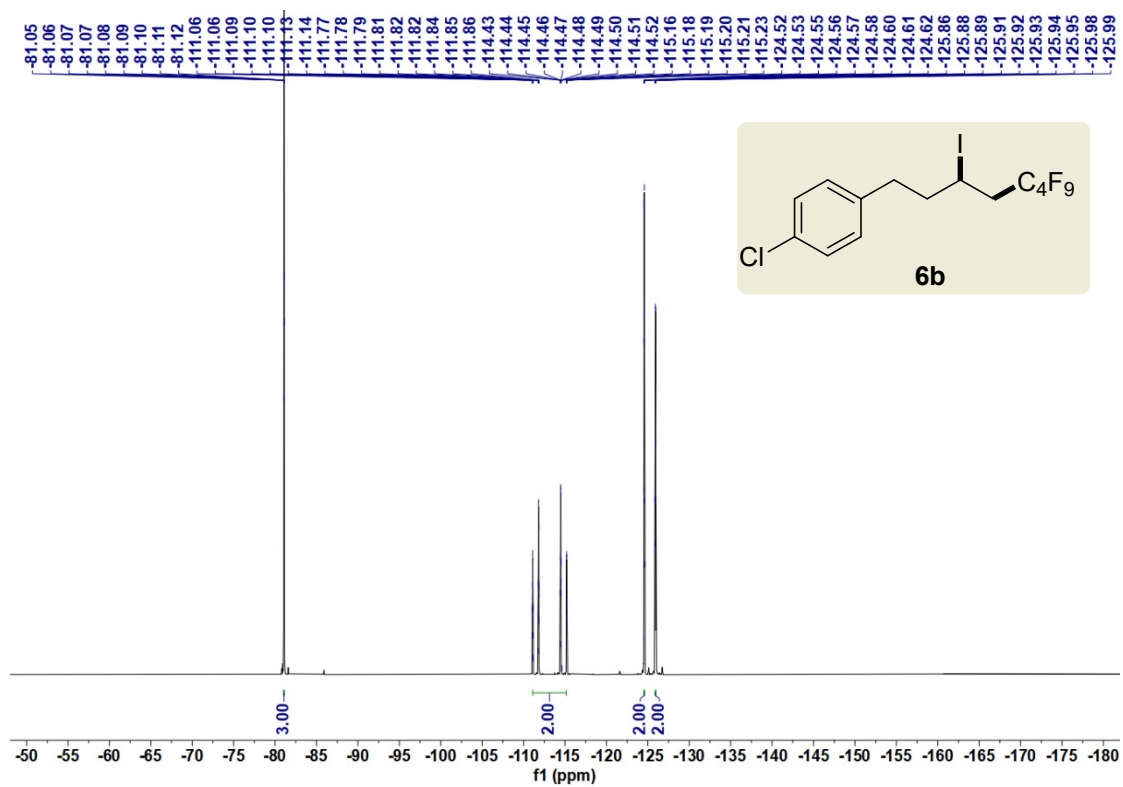



$^1\text{H}$  NMR (400 MHz,  $\text{CDCl}_3$ ) of compound **6c**:

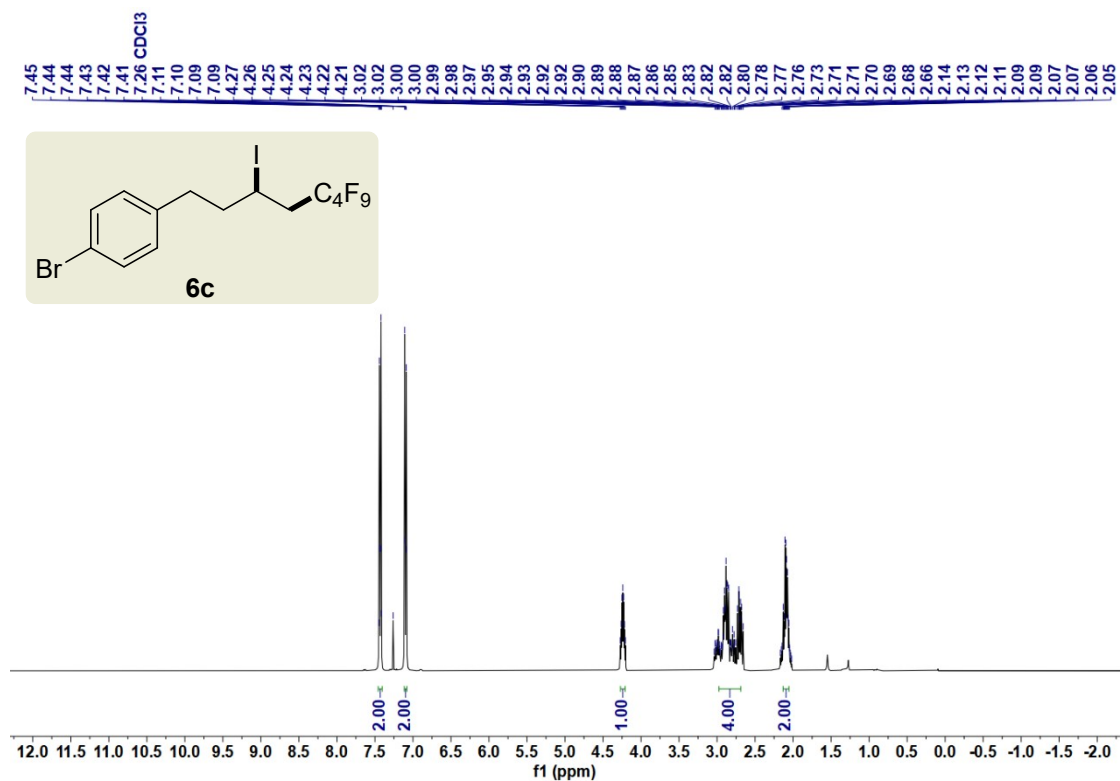

$^{13}\text{C}$  NMR (100 MHz,  $\text{CDCl}_3$ ) of compound **6c**:

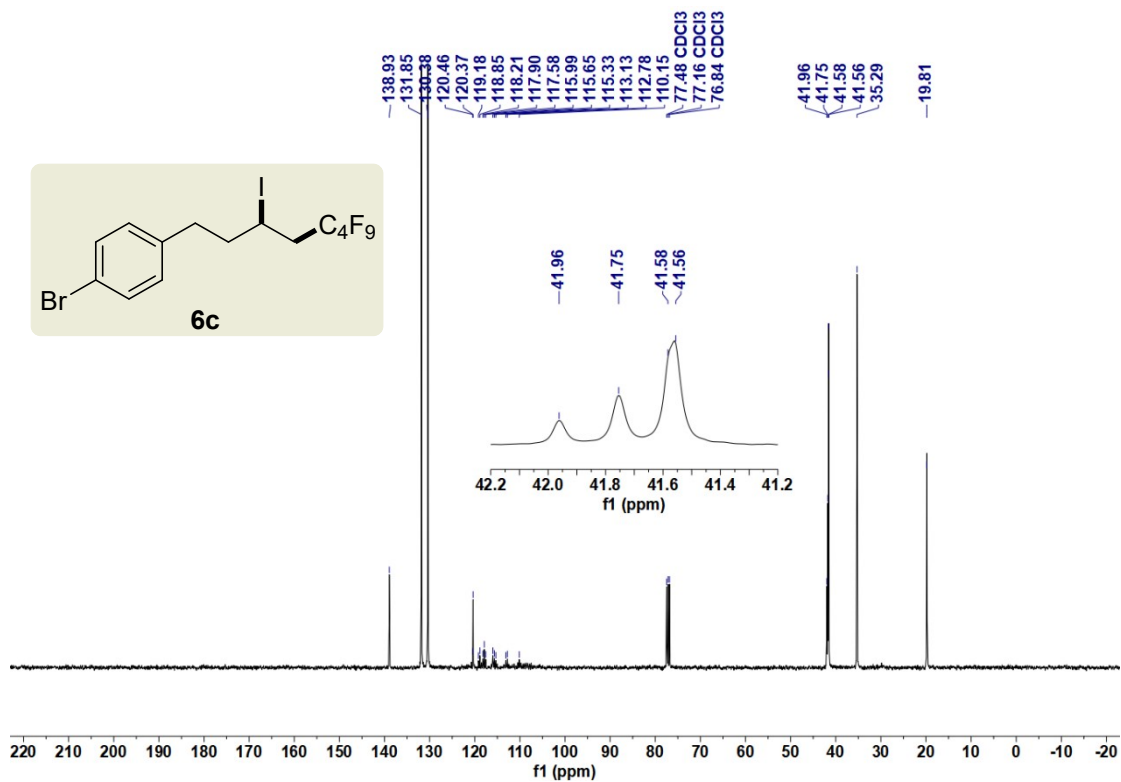

$^{19}\text{F}$  NMR (376 MHz,  $\text{CDCl}_3$ ) of compound **6c**:

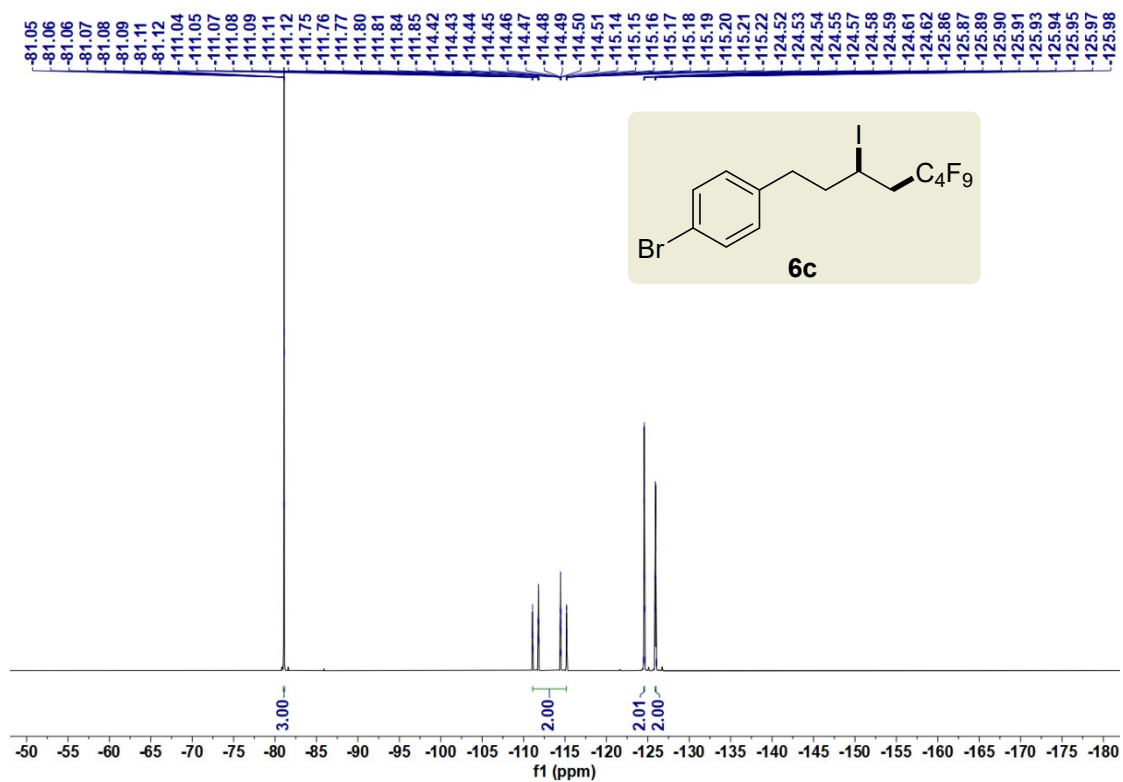

$^1\text{H}$  NMR (400 MHz,  $\text{CDCl}_3$ ) of compound **6d**:

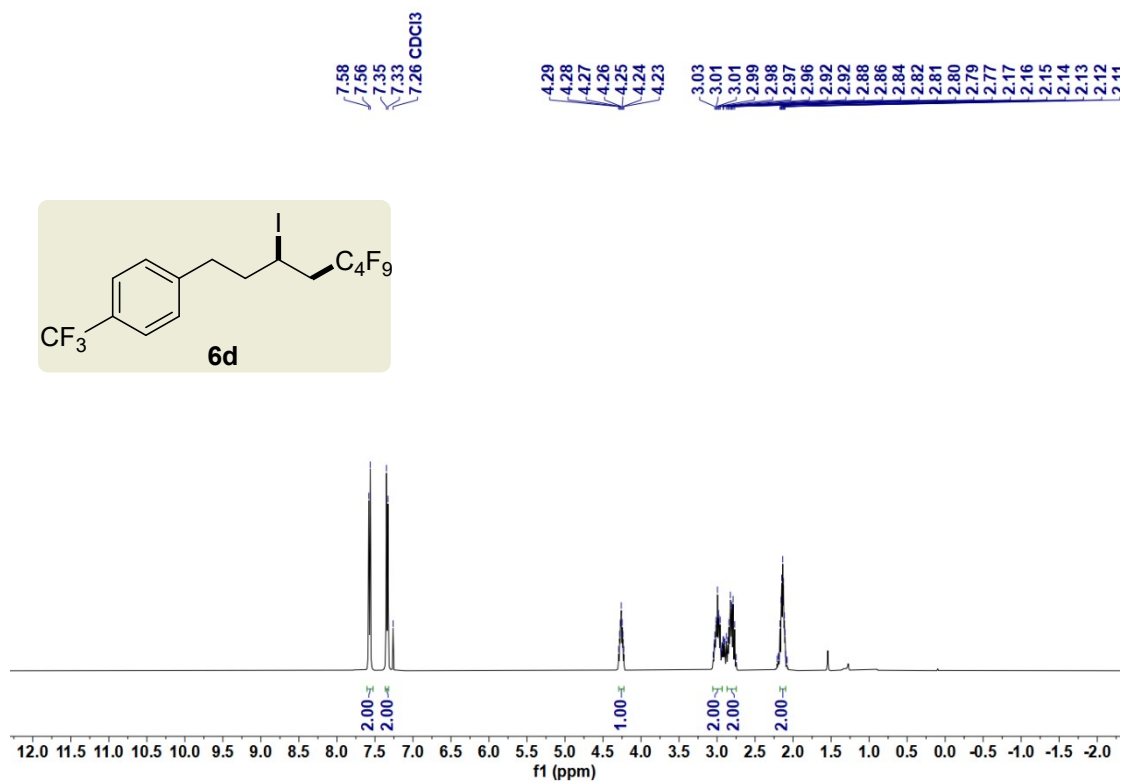

$^{13}\text{C}$  NMR (100 MHz,  $\text{CDCl}_3$ ) of compound **6d**:

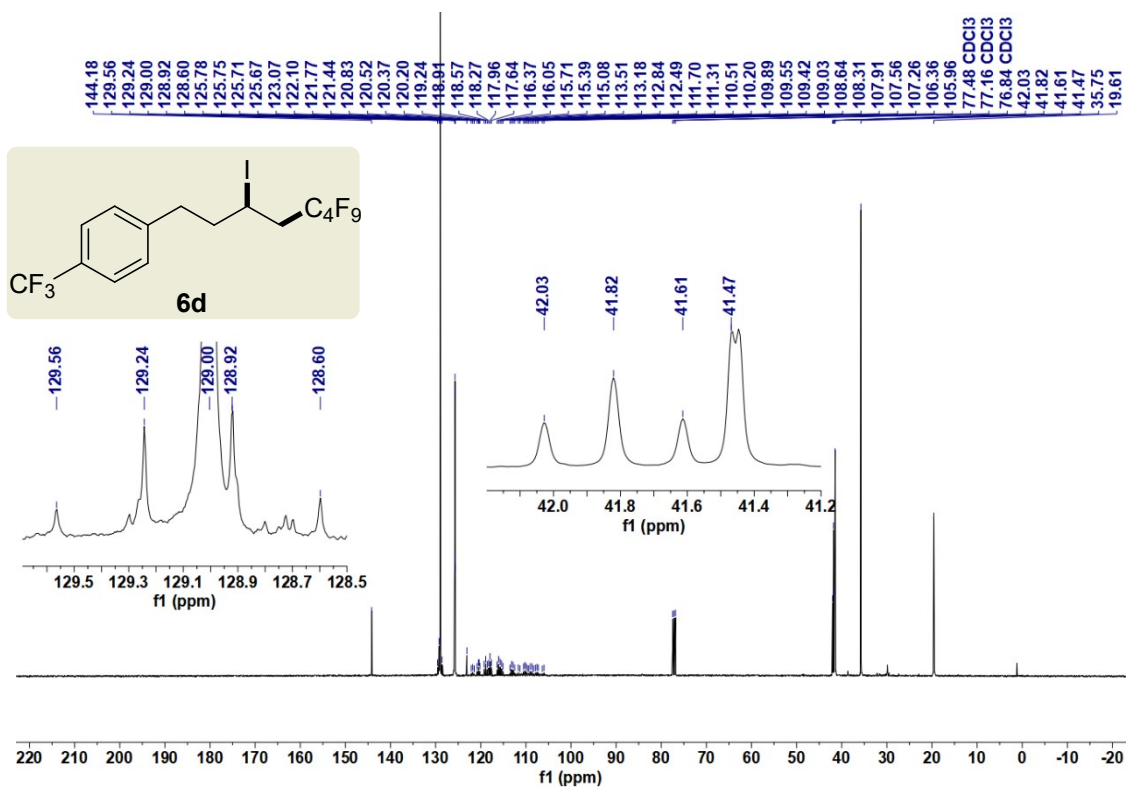

$^{19}\text{F}$  NMR (376 MHz,  $\text{CDCl}_3$ ) of compound **6d**:

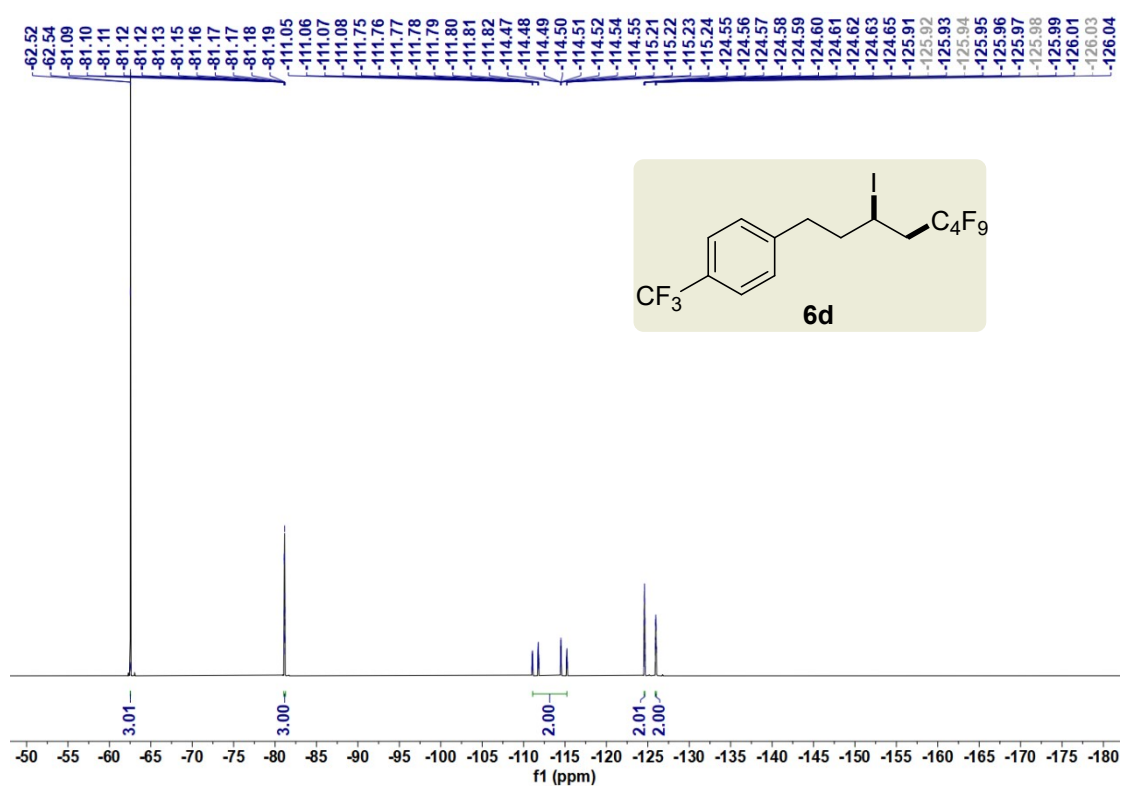

$^1\text{H}$  NMR (400 MHz,  $\text{CDCl}_3$ ) of compound **6e**:

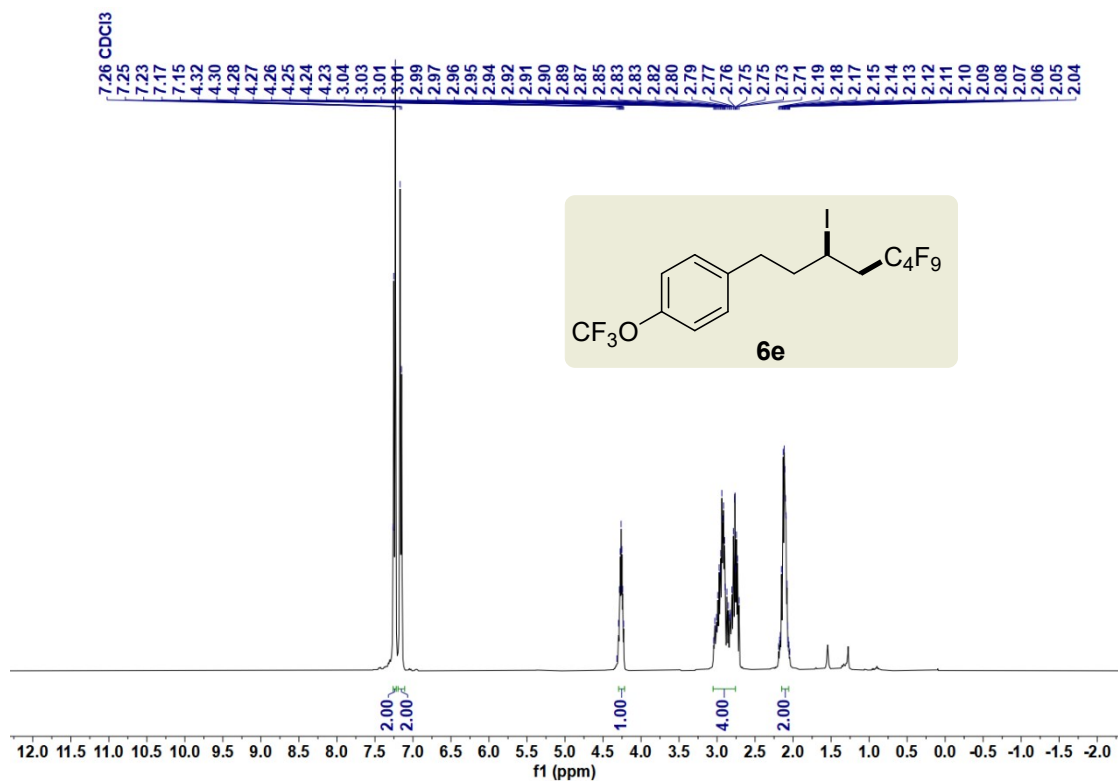

$^{13}\text{C}$  NMR (100 MHz,  $\text{CDCl}_3$ ) of compound **6e**:

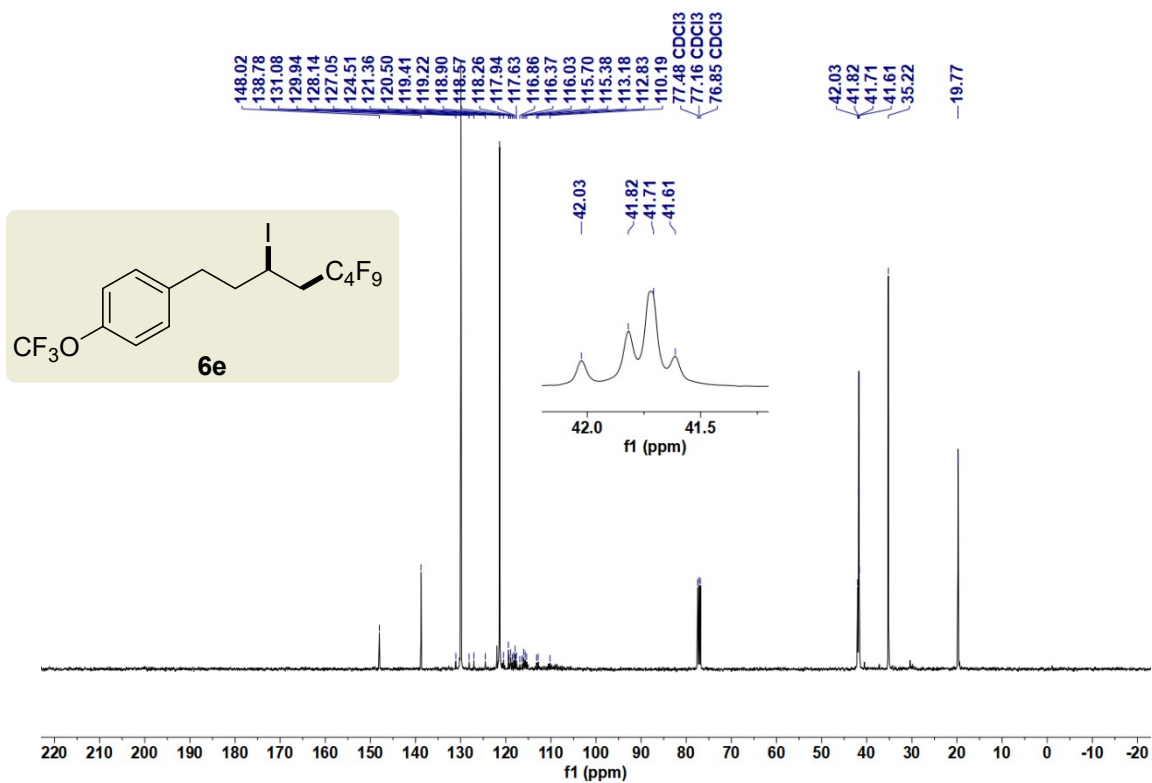

$^{19}\text{F}$  NMR (376 MHz,  $\text{CDCl}_3$ ) of compound **6e**:

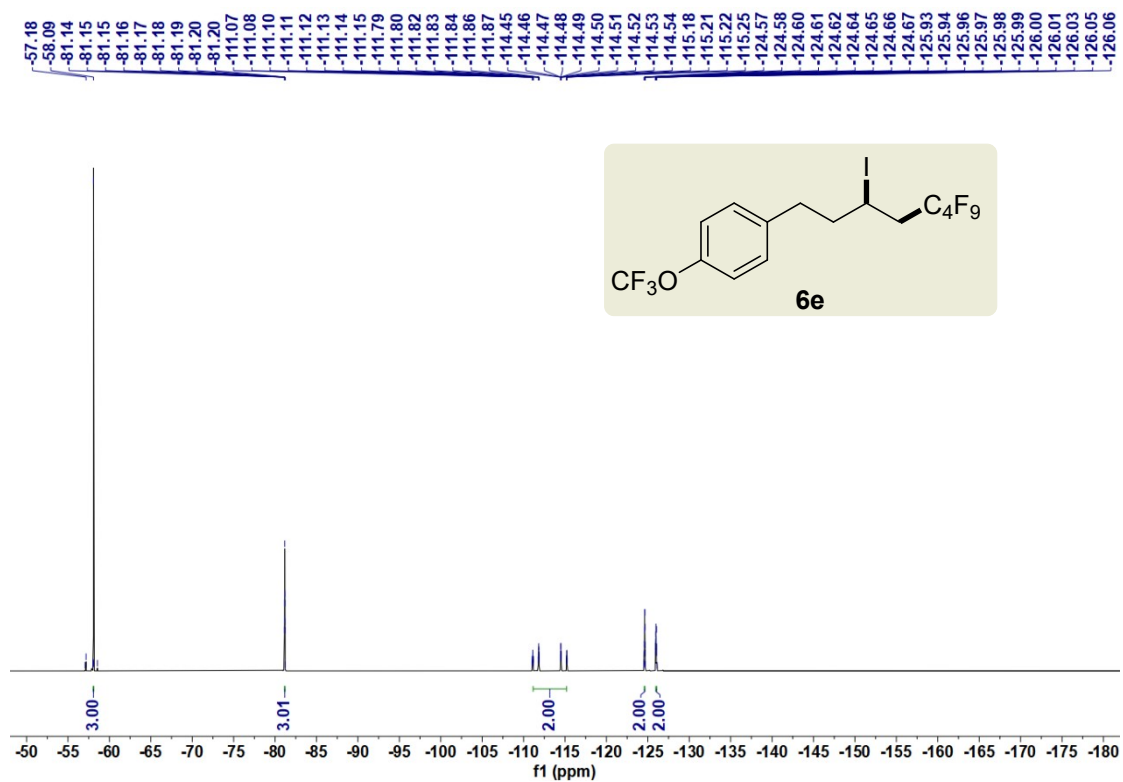

$^1\text{H}$  NMR (400 MHz,  $\text{CDCl}_3$ ) of compound **6f**:

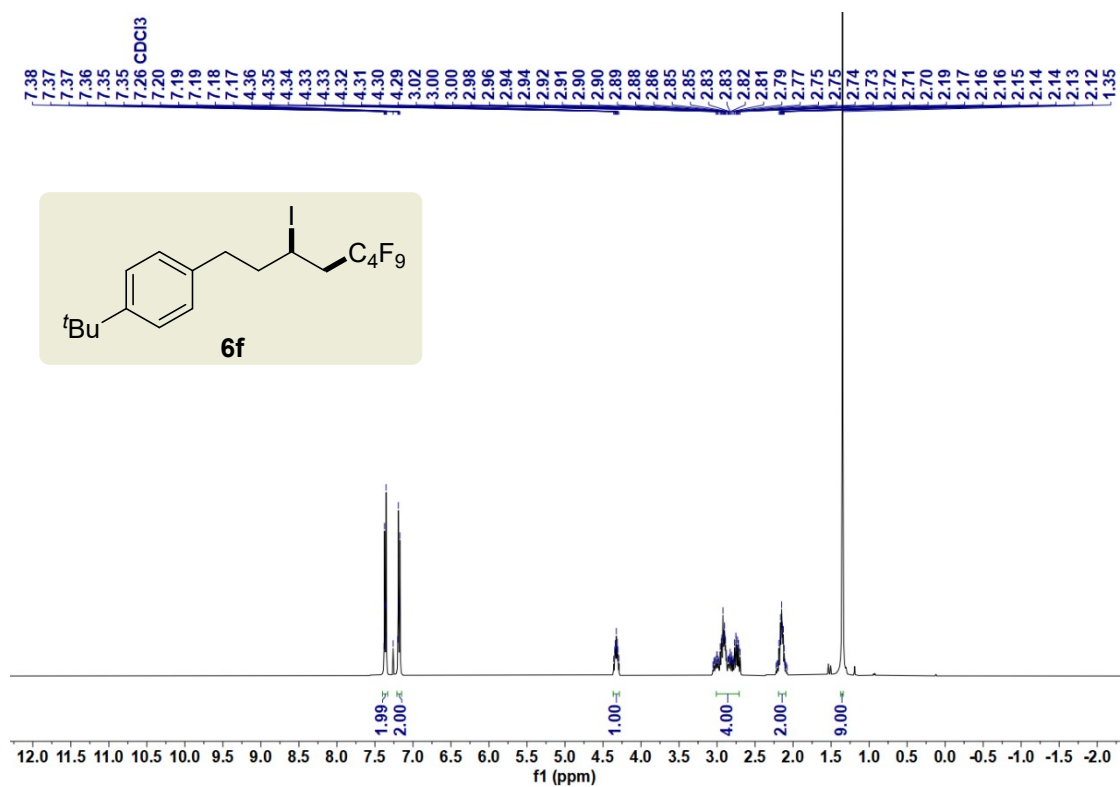

$^{13}\text{C}$  NMR (100 MHz,  $\text{CDCl}_3$ ) of compound **6f**:

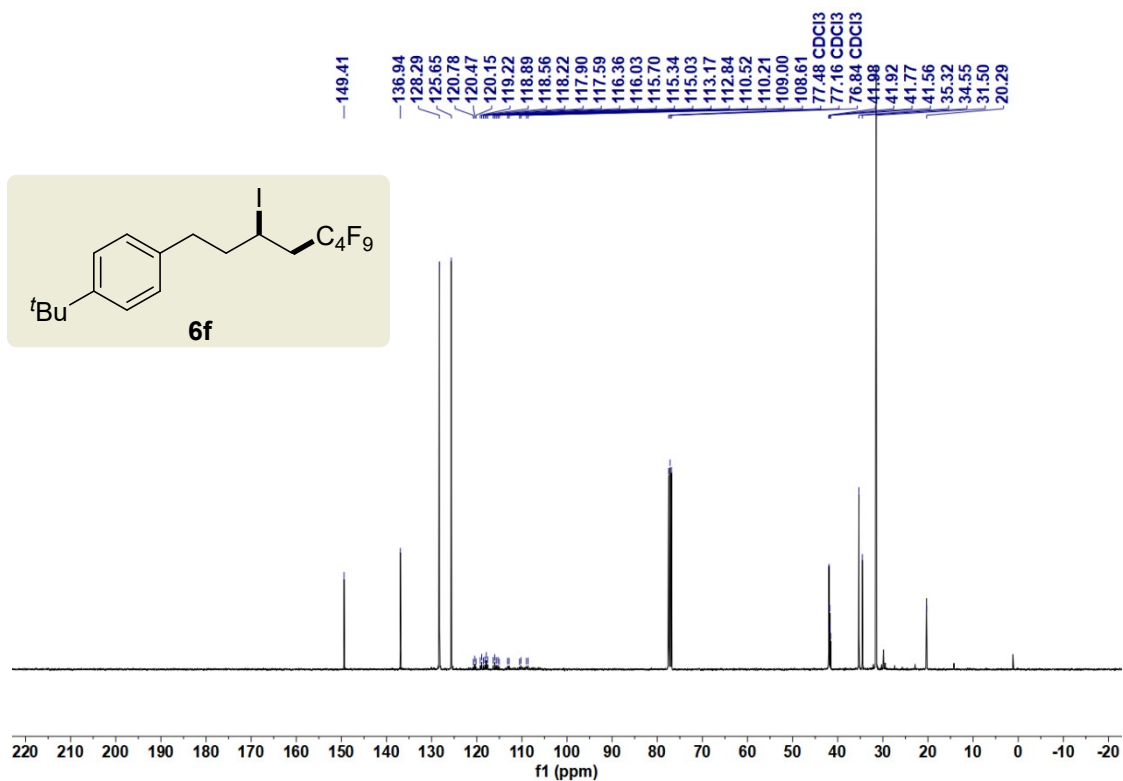

$^{19}\text{F}$  NMR (376 MHz,  $\text{CDCl}_3$ ) of compound **6f**:

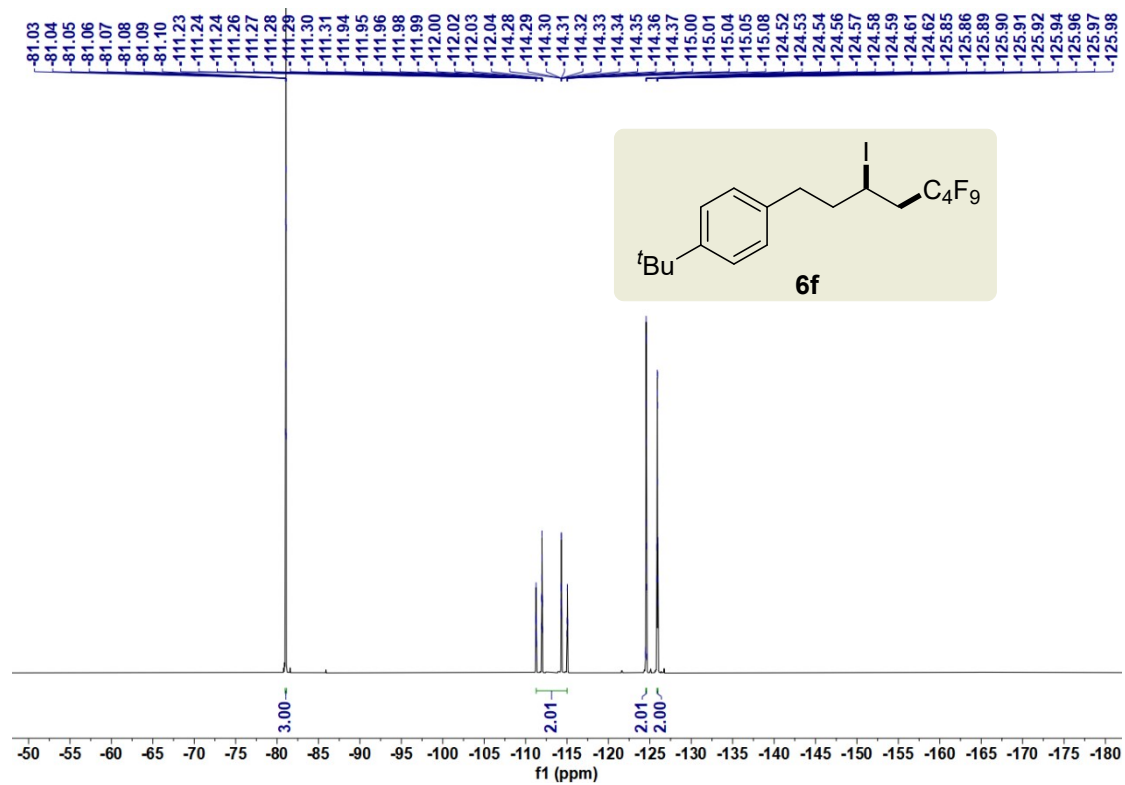

$^1\text{H}$  NMR (400 MHz,  $\text{CDCl}_3$ ) of compound **6g**:

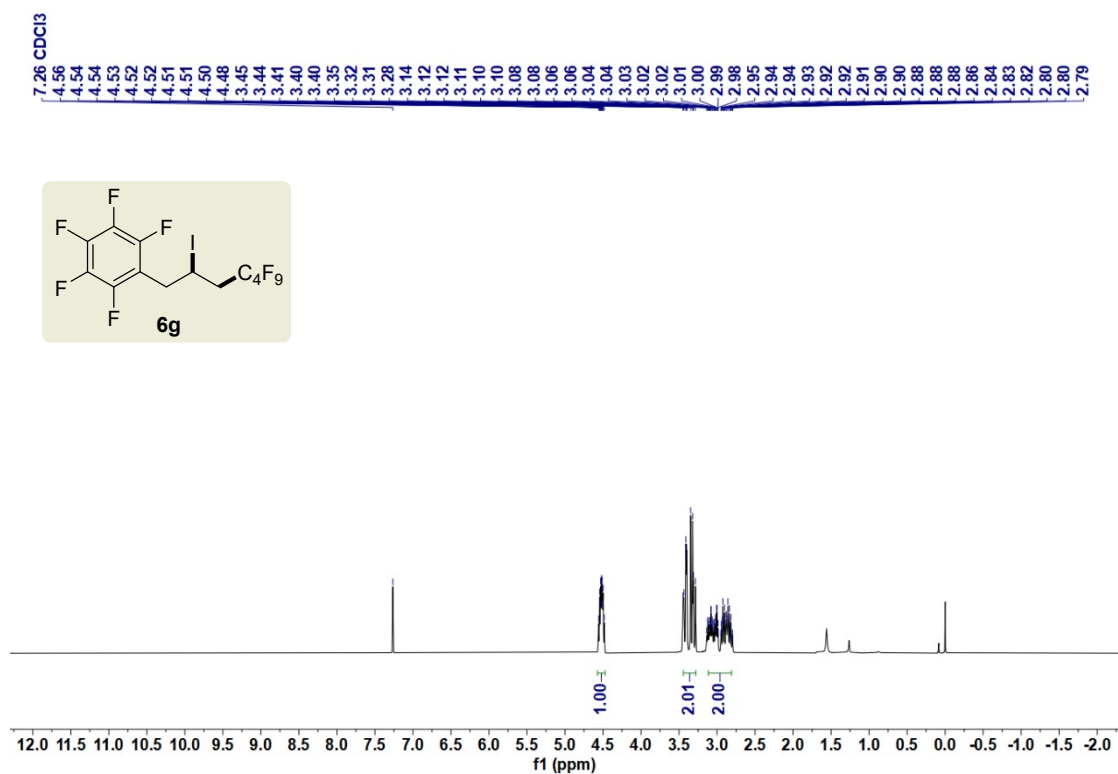

$^{13}\text{C}$  NMR (100 MHz,  $\text{CDCl}_3$ ) of compound **6g**:

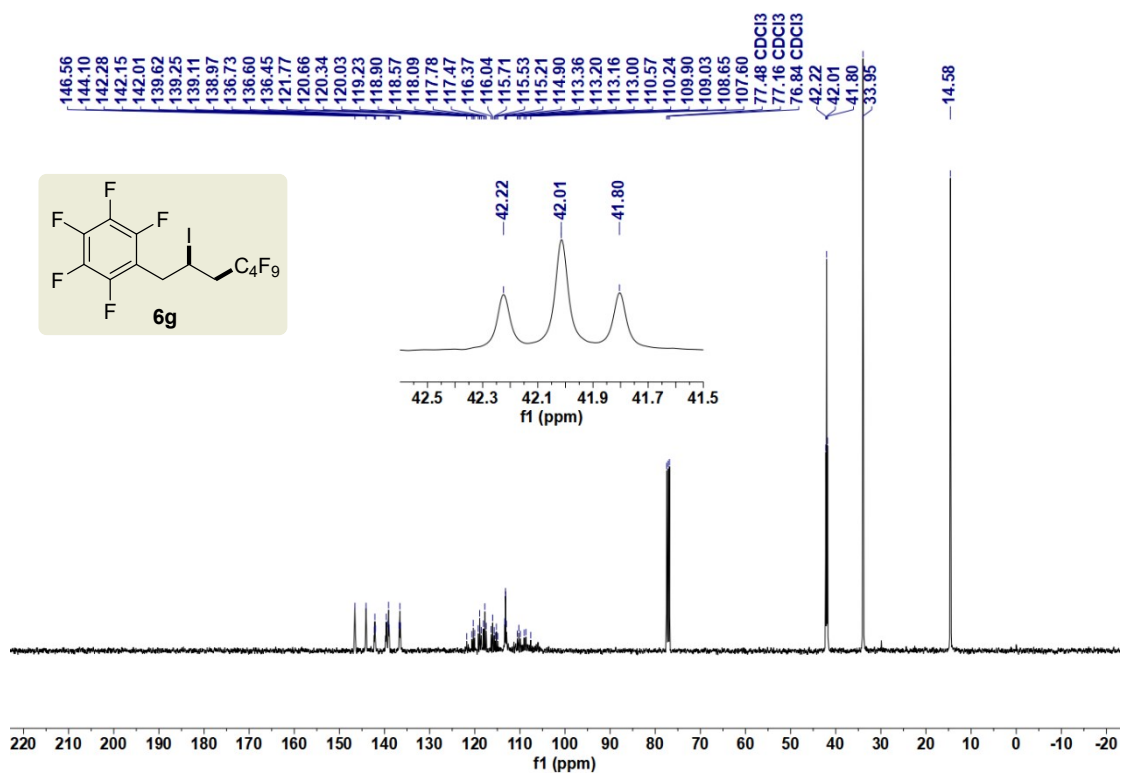

$^{19}\text{F}$  NMR (376 MHz,  $\text{CDCl}_3$ ) of compound **6g**:

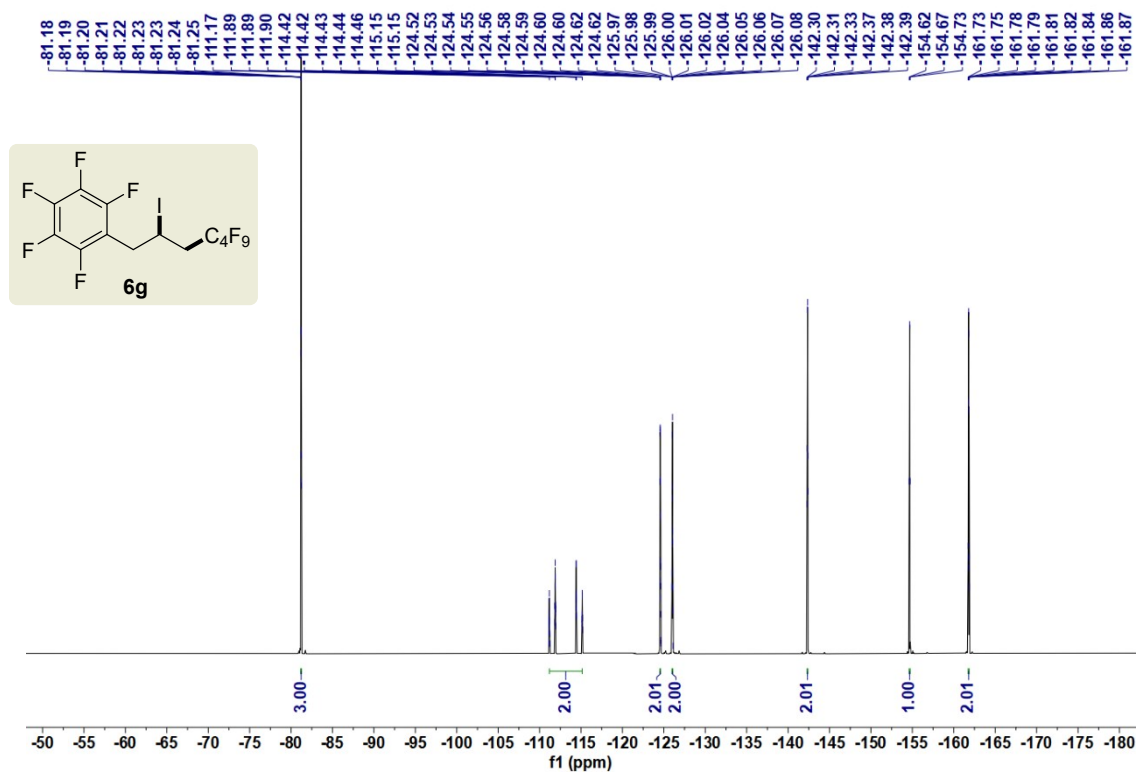

$^1\text{H}$  NMR (400 MHz,  $\text{CDCl}_3$ ) of compound **6h**:

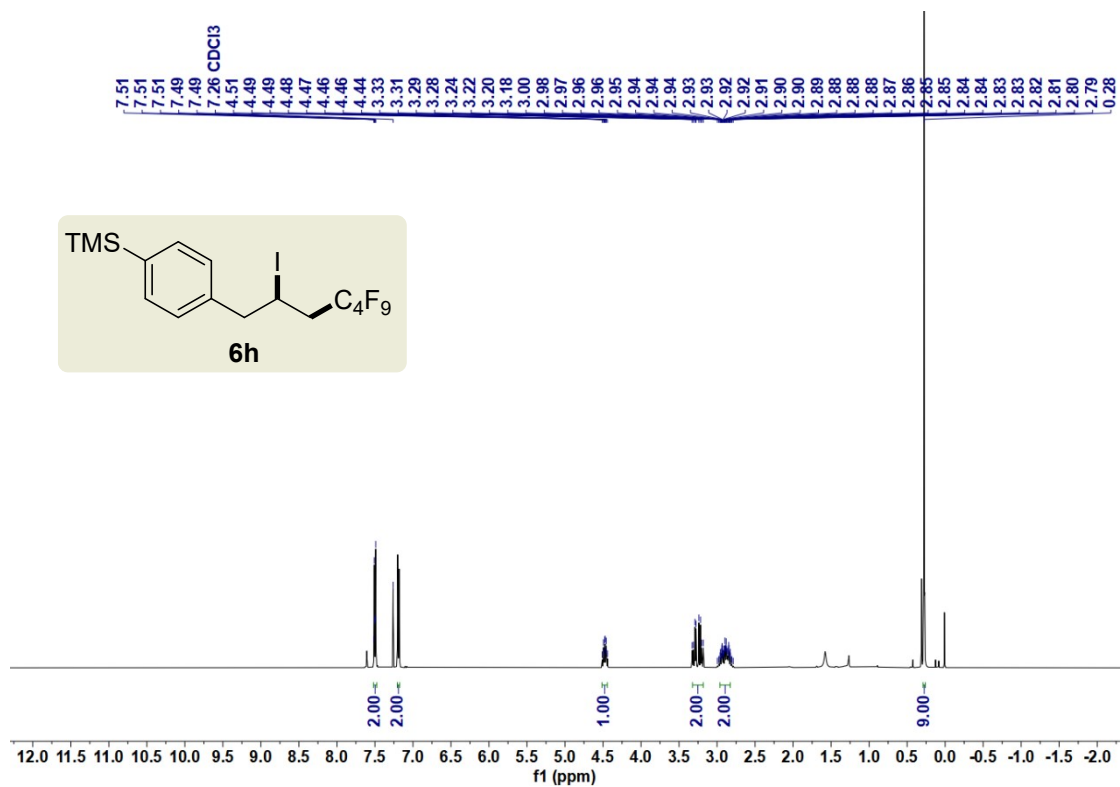



$^{13}\text{C}$  NMR (100 MHz,  $\text{CDCl}_3$ ) of compound **6h**:

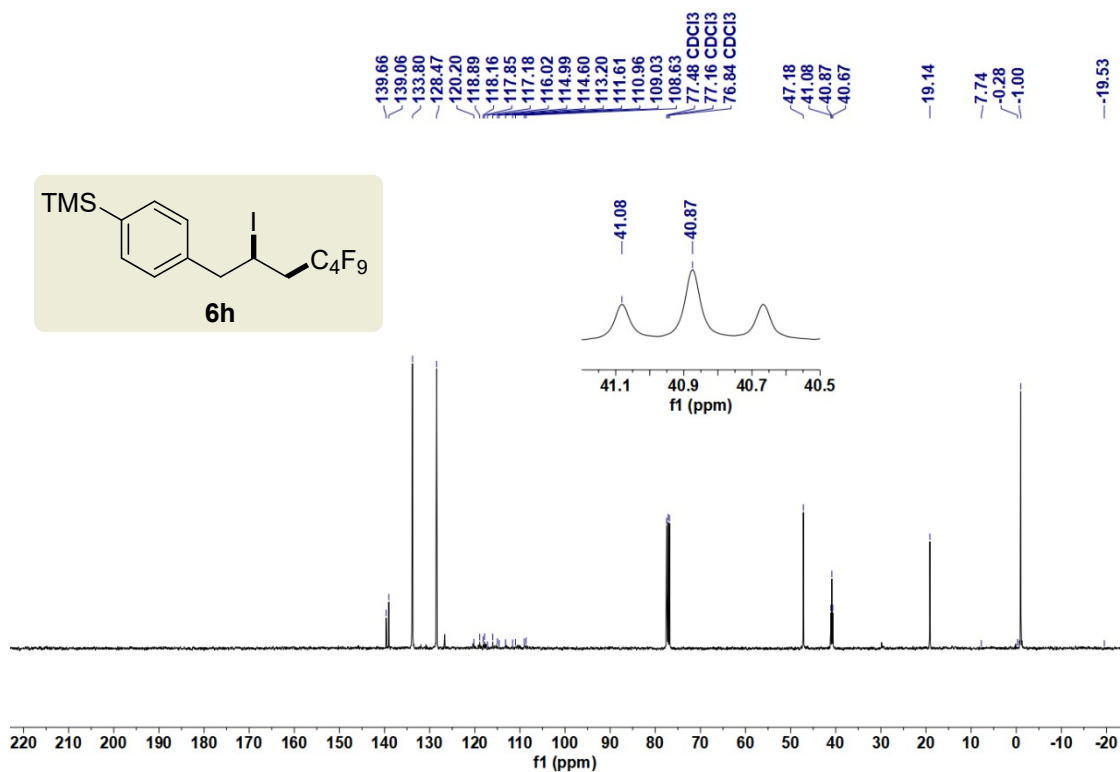

$^{19}\text{F}$  NMR (376 MHz,  $\text{CDCl}_3$ ) of compound **6h**:

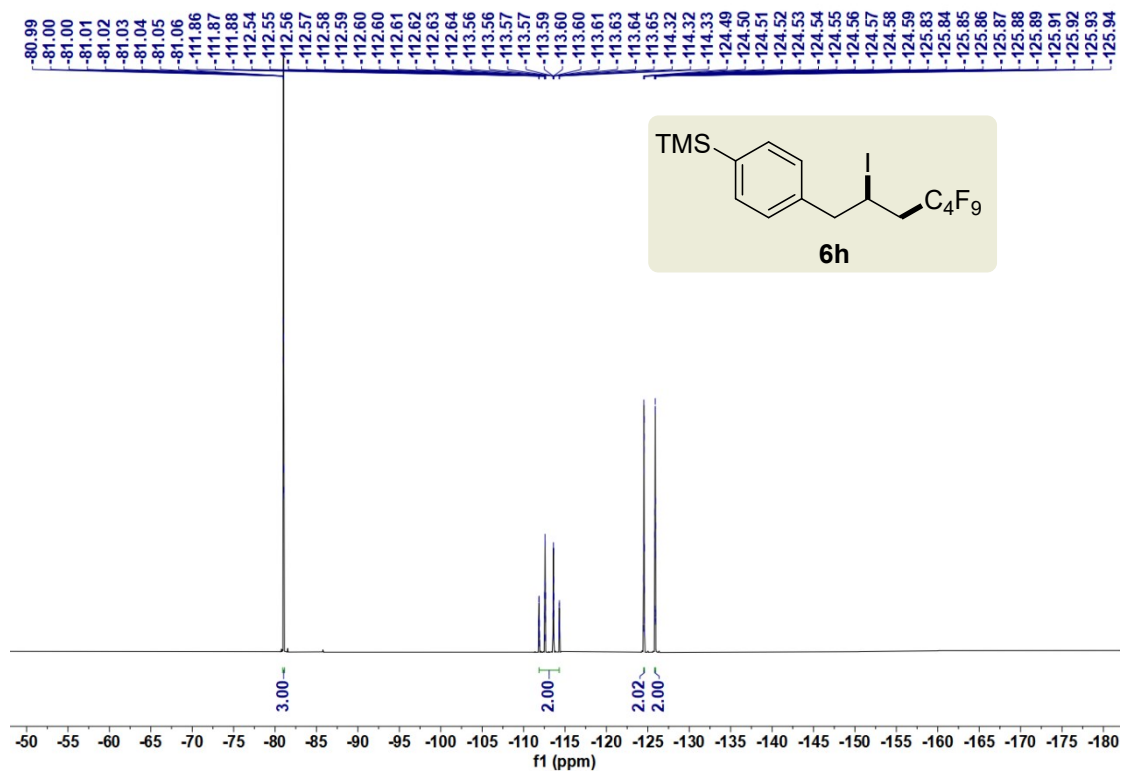

$^1\text{H}$  NMR (400 MHz,  $\text{CDCl}_3$ ) of compound **6i**:

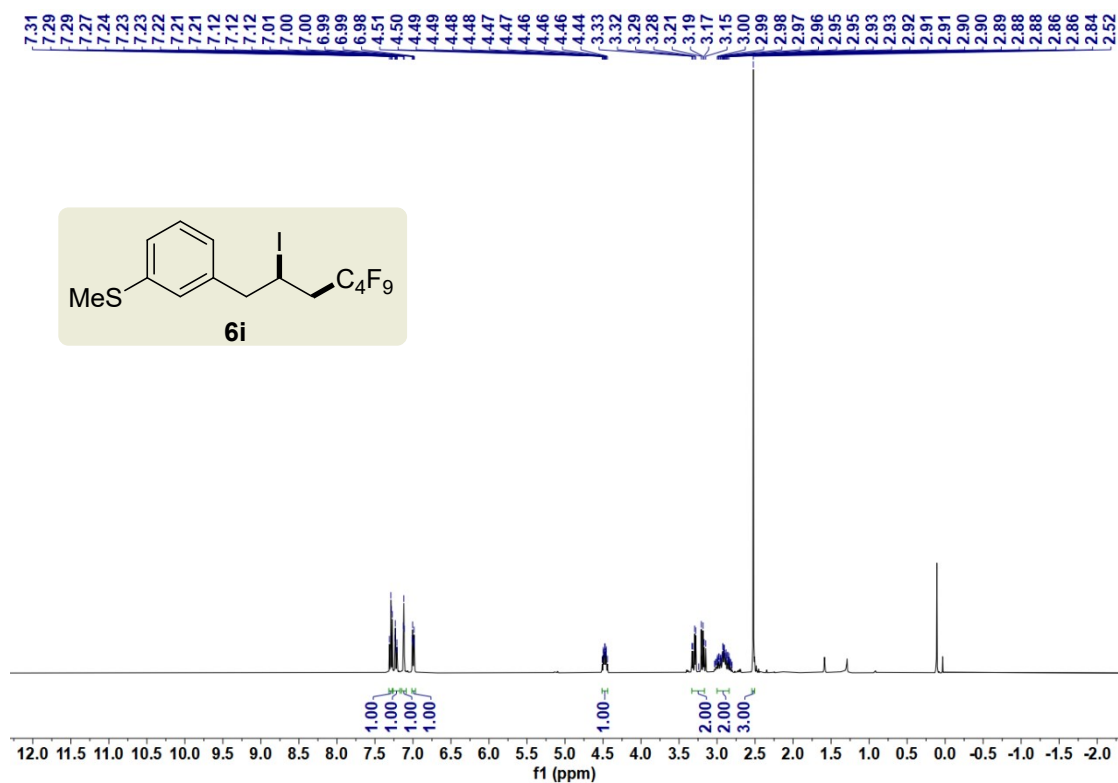

$^{13}\text{C}$  NMR (100 MHz,  $\text{CDCl}_3$ ) of compound **6i**:

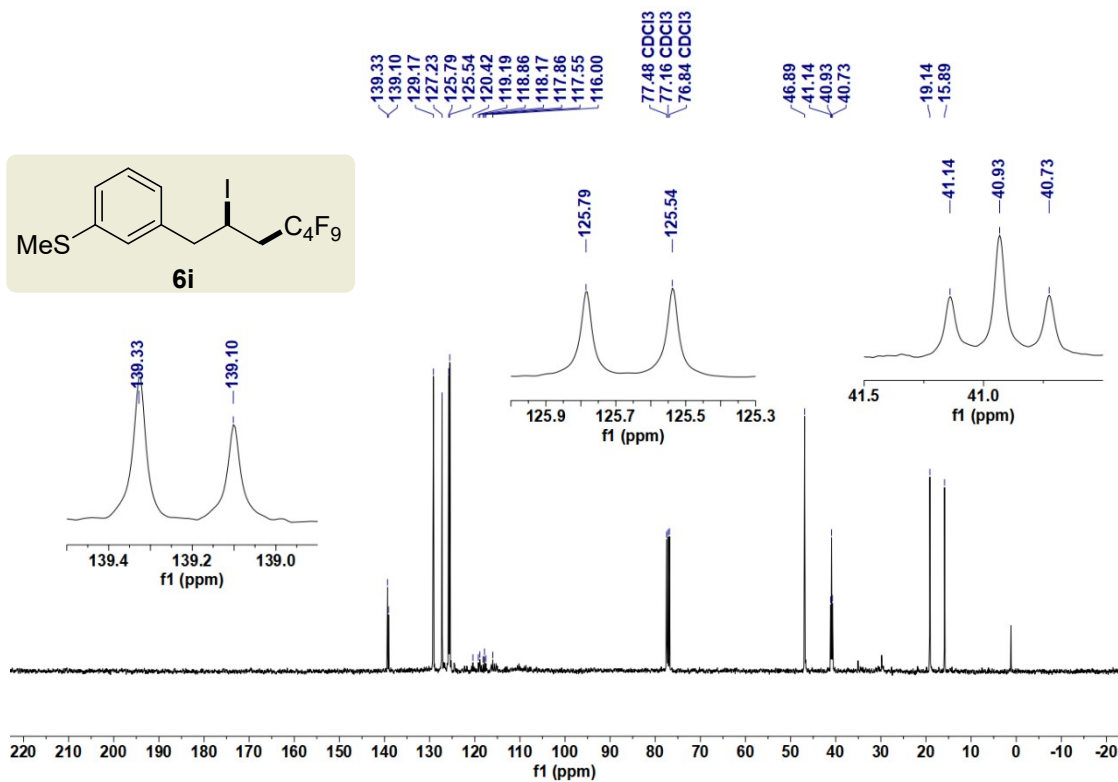

$^{19}\text{F}$  NMR (376 MHz,  $\text{CDCl}_3$ ) of compound **6i**:

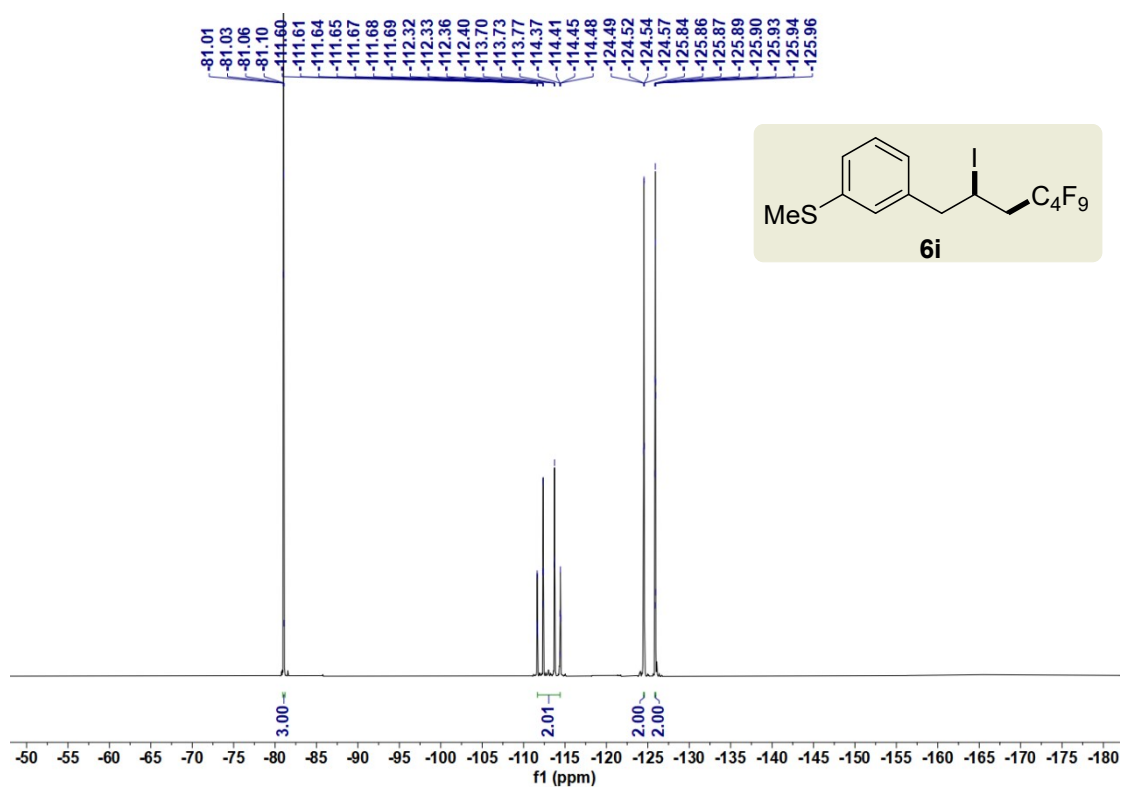

$^1\text{H}$  NMR (400 MHz,  $\text{CDCl}_3$ ) of compound **6j**:

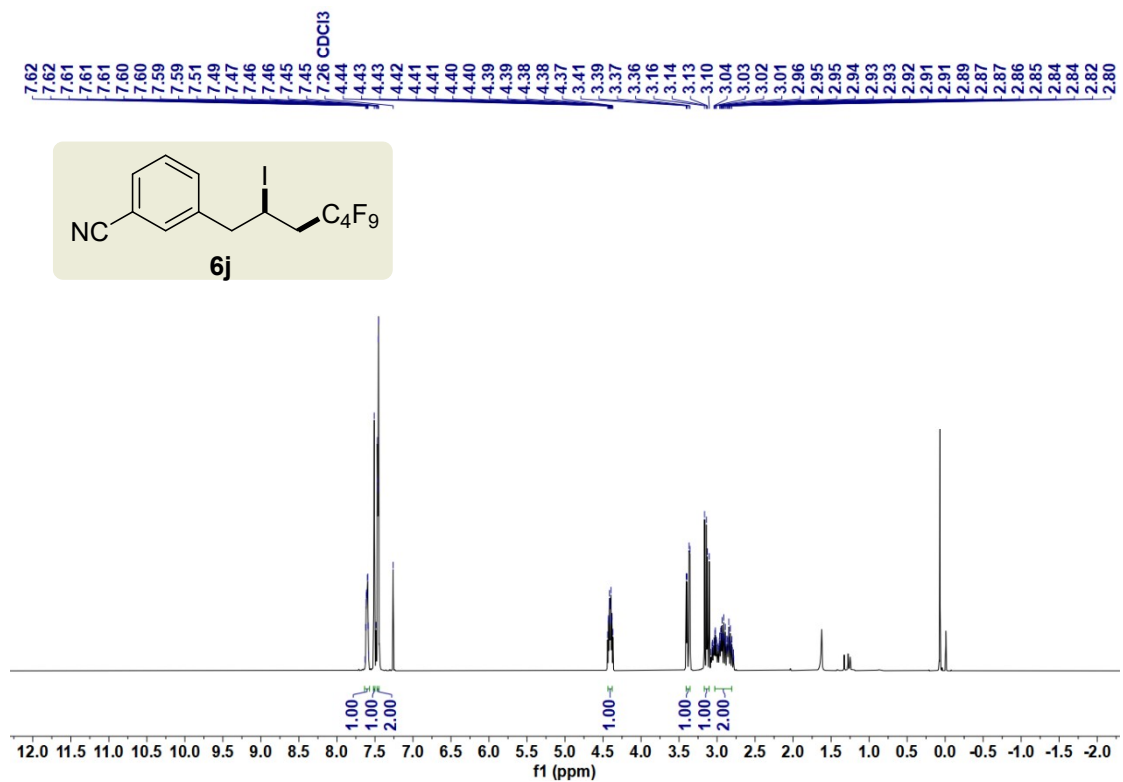

$^{13}\text{C}$  NMR (100 MHz,  $\text{CDCl}_3$ ) of compound **6j**:

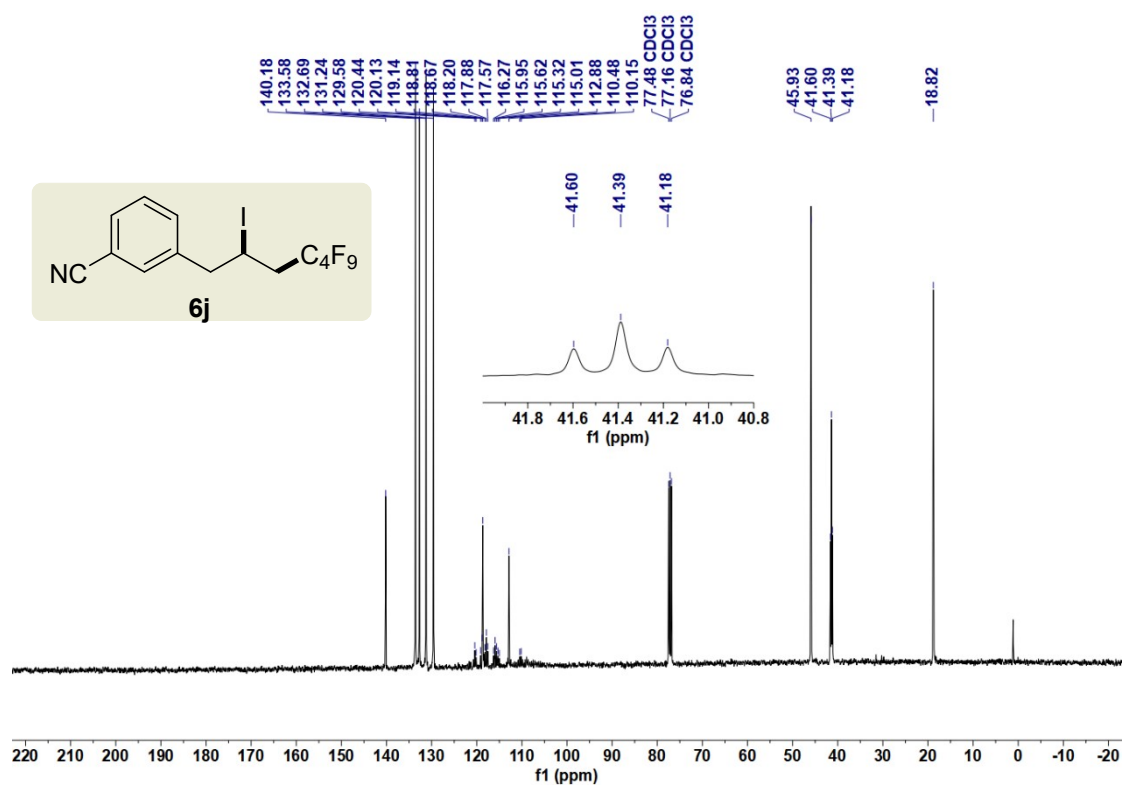

$^{19}\text{F}$  NMR (376 MHz,  $\text{CDCl}_3$ ) of compound **6j**:

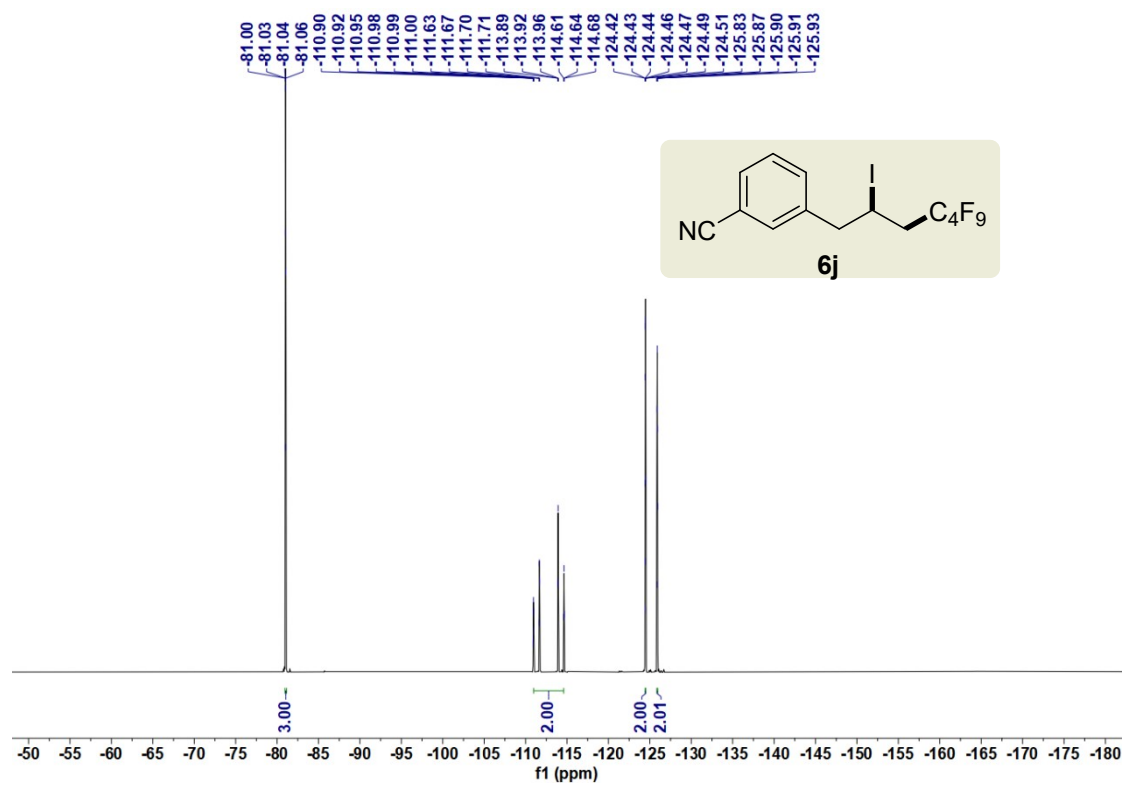

$^1\text{H}$  NMR (400 MHz,  $\text{CDCl}_3$ ) of compound **6k**:

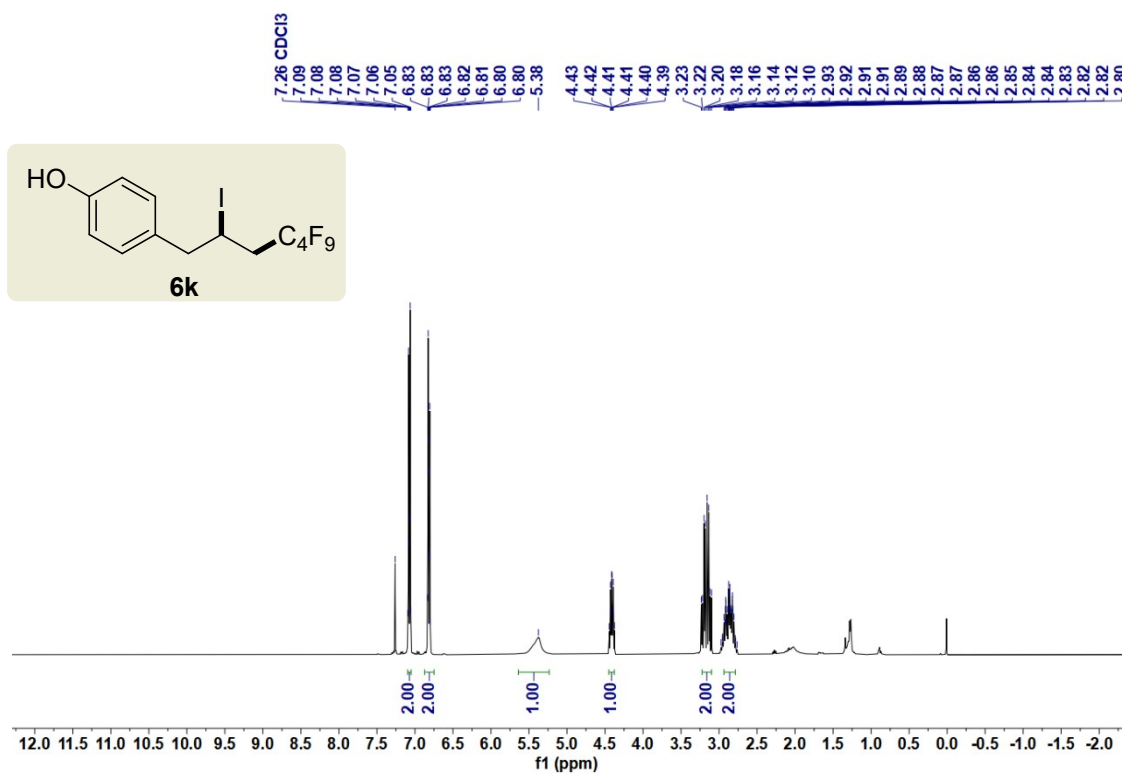

$^{13}\text{C}$  NMR (100 MHz,  $\text{CDCl}_3$ ) of compound **6k**:

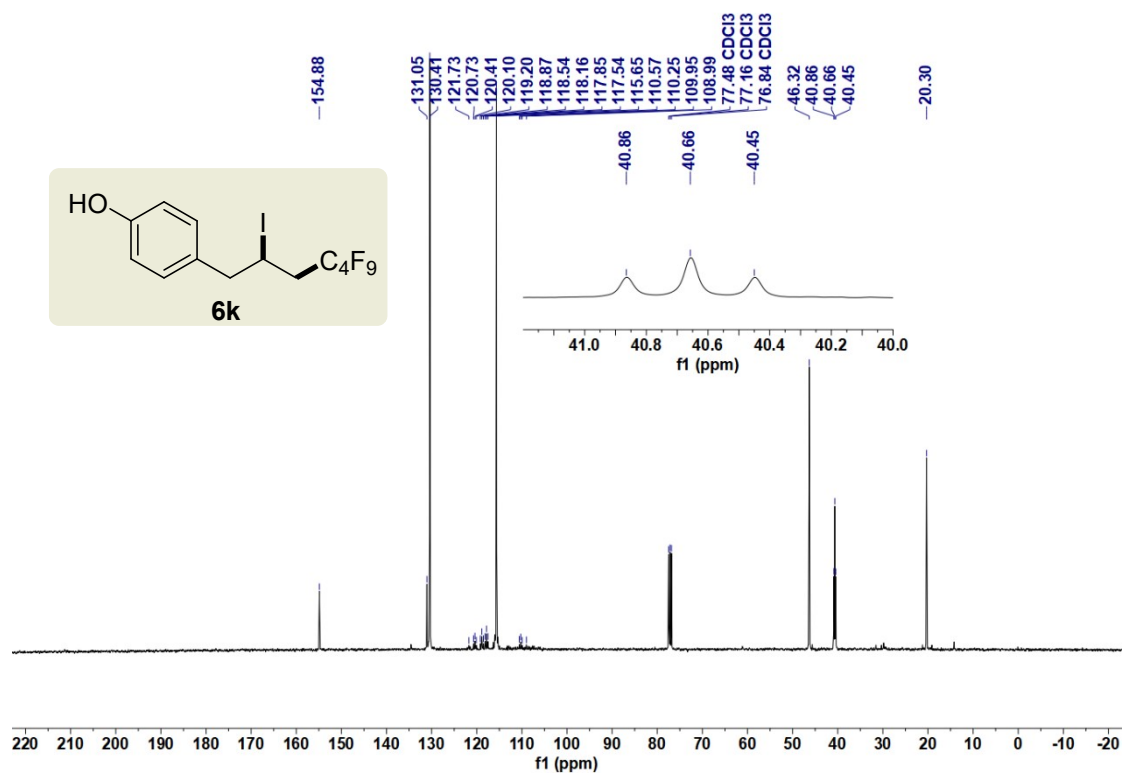

$^{19}\text{F}$  NMR (376 MHz,  $\text{CDCl}_3$ ) of compound **6k**:

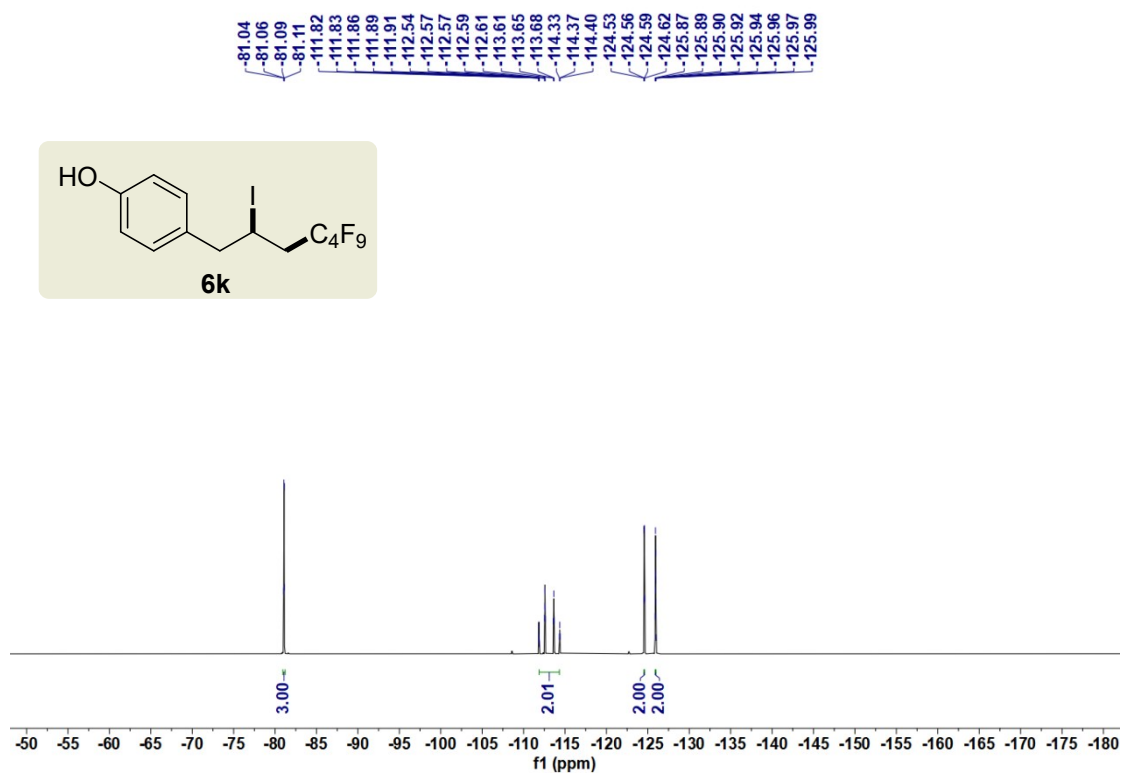

$^1\text{H}$  NMR (400 MHz,  $\text{CDCl}_3$ ) of compound **6l**:

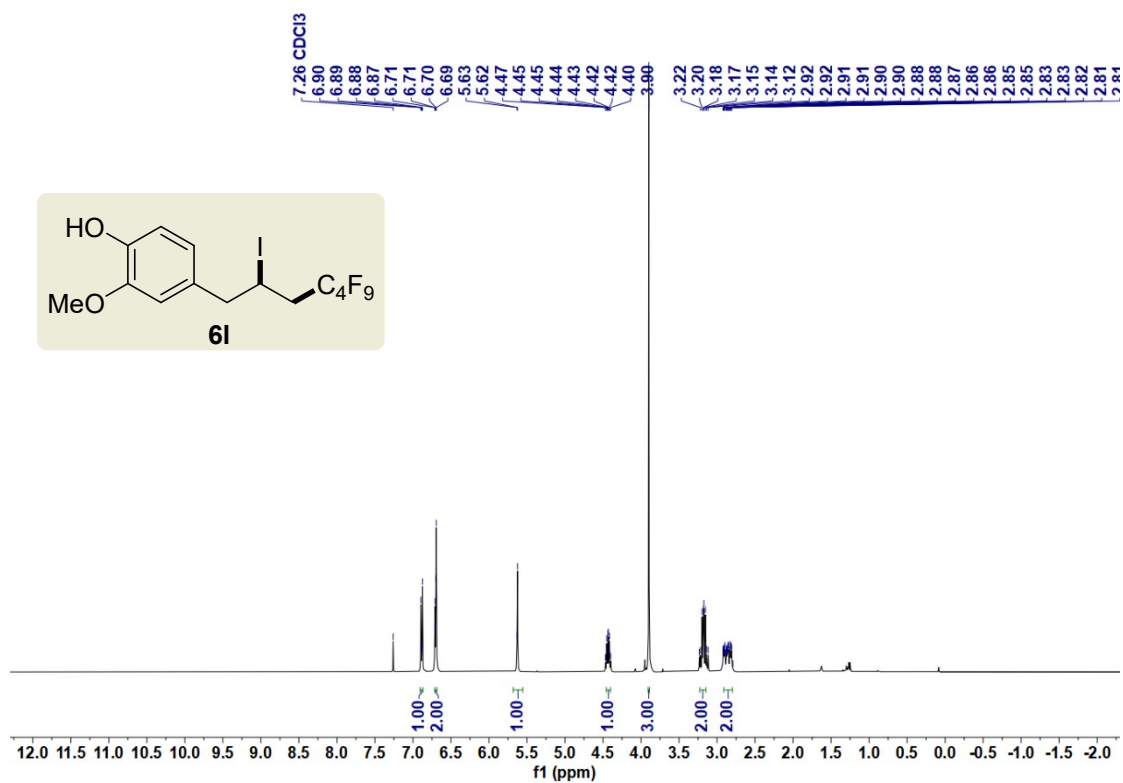

$^{13}\text{C}$  NMR (100 MHz,  $\text{CDCl}_3$ ) of compound **6l**:

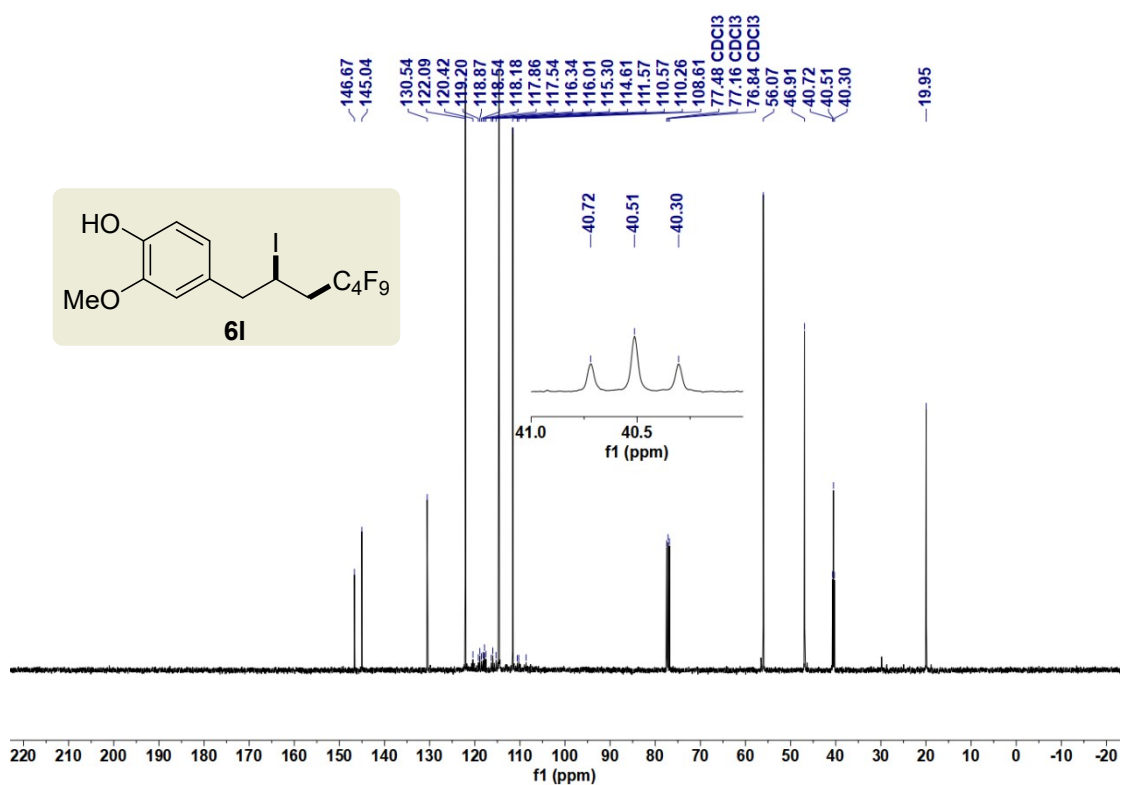

$^{19}\text{F}$  NMR (376 MHz,  $\text{CDCl}_3$ ) of compound **6l**:

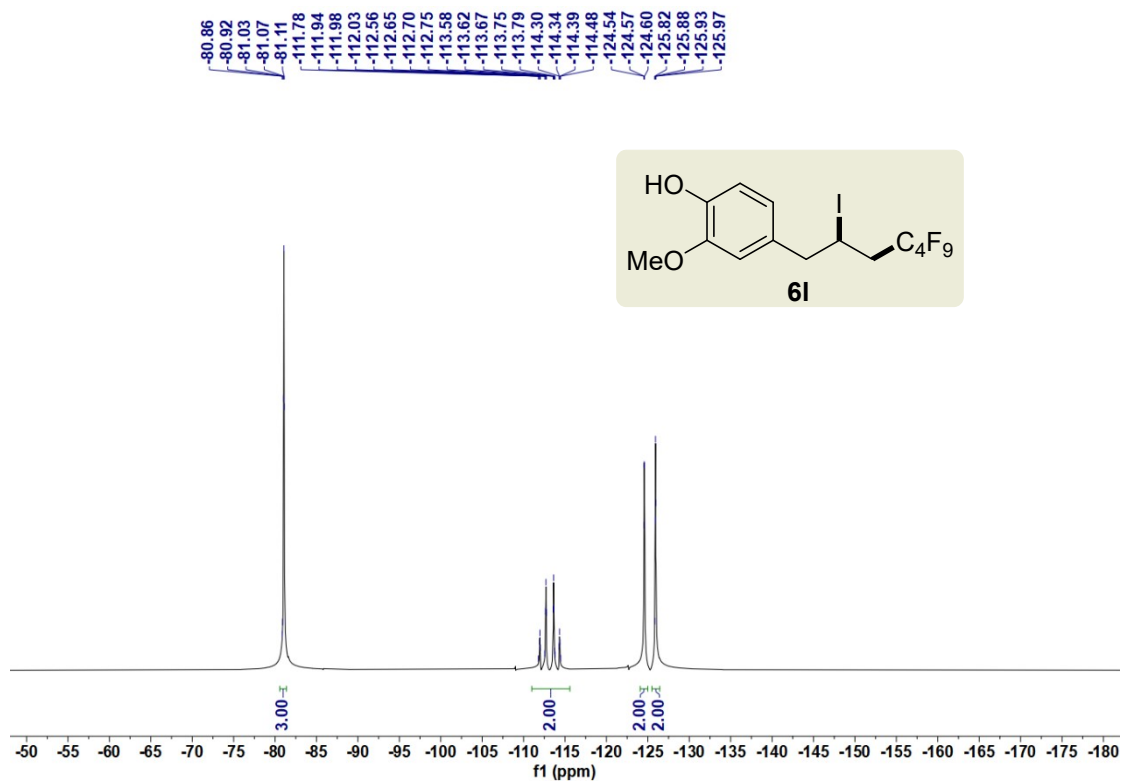

$^1\text{H}$  NMR (400 MHz,  $\text{CDCl}_3$ ) of compound **6m**:

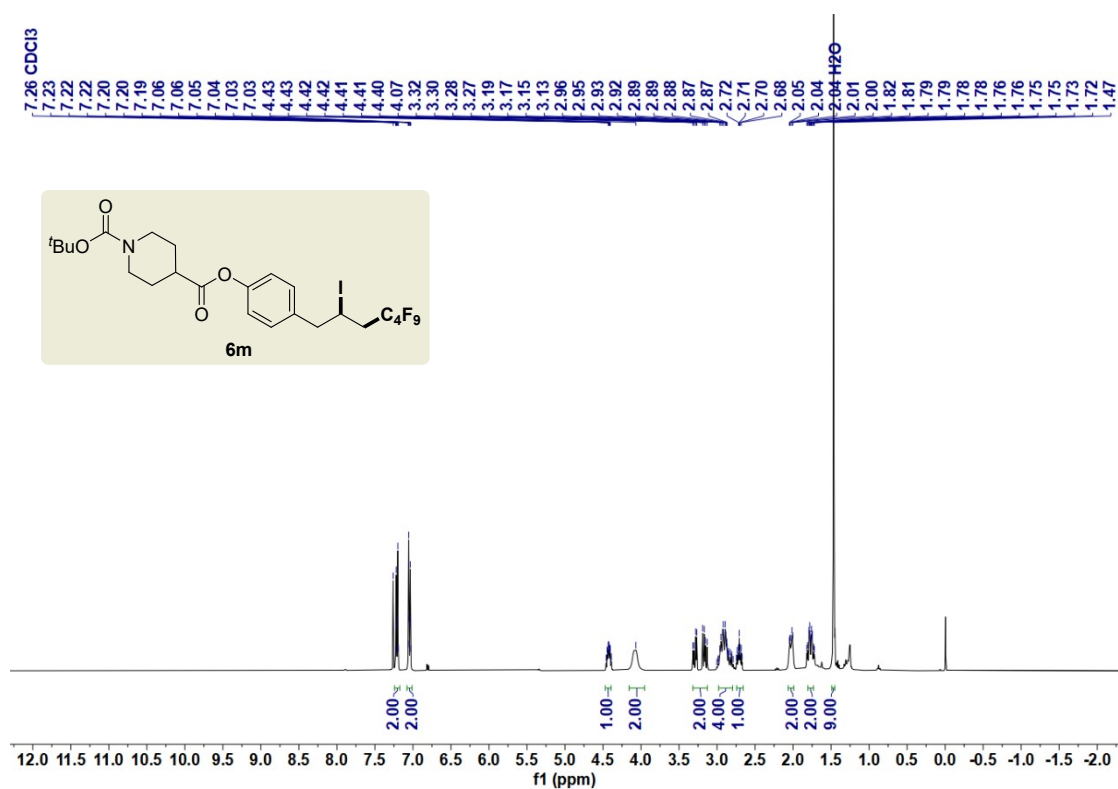

$^{13}\text{C}$  NMR (100 MHz,  $\text{CDCl}_3$ ) of compound **6m**:

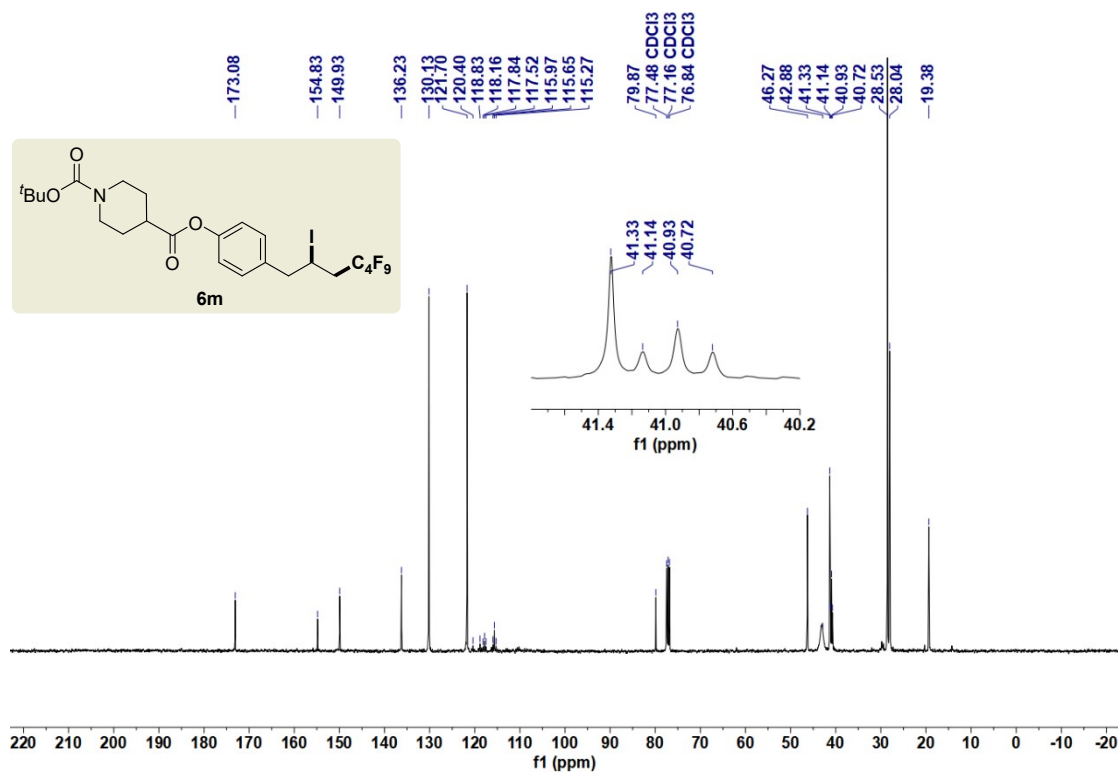



$^{19}\text{F}$  NMR (376 MHz,  $\text{CDCl}_3$ ) of compound **6m**:

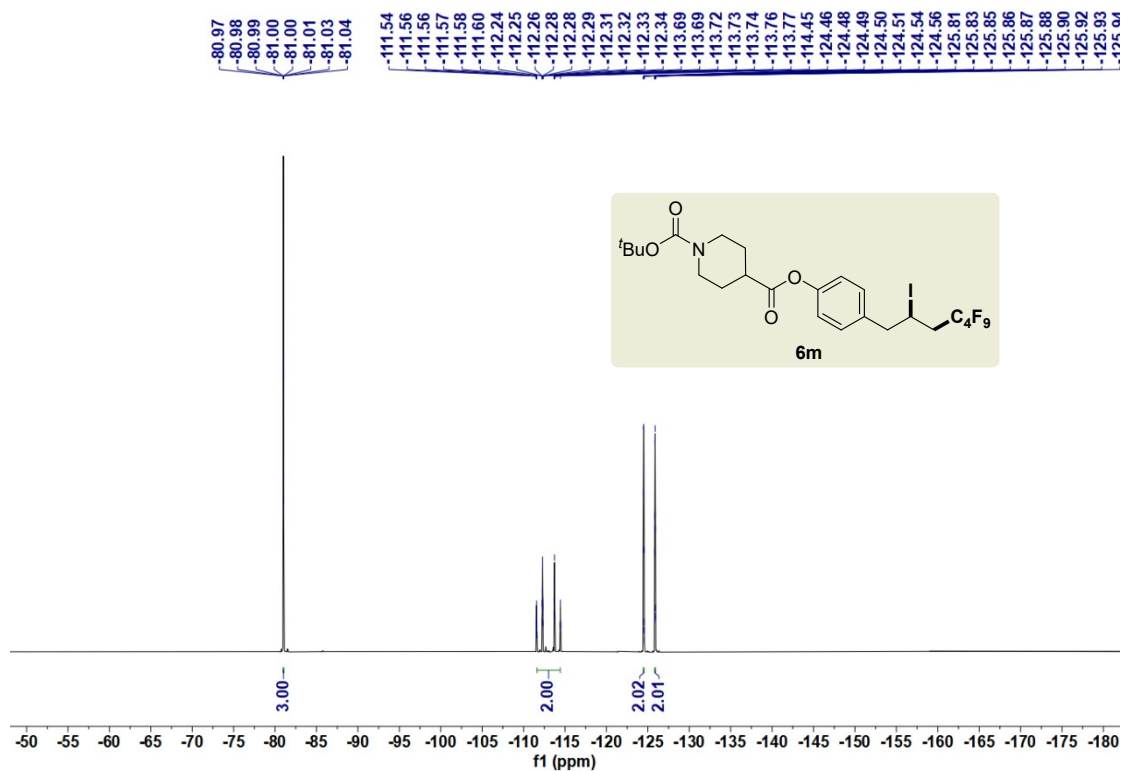

$^1\text{H}$  NMR (400 MHz,  $\text{CDCl}_3$ ) of compound **6n**:

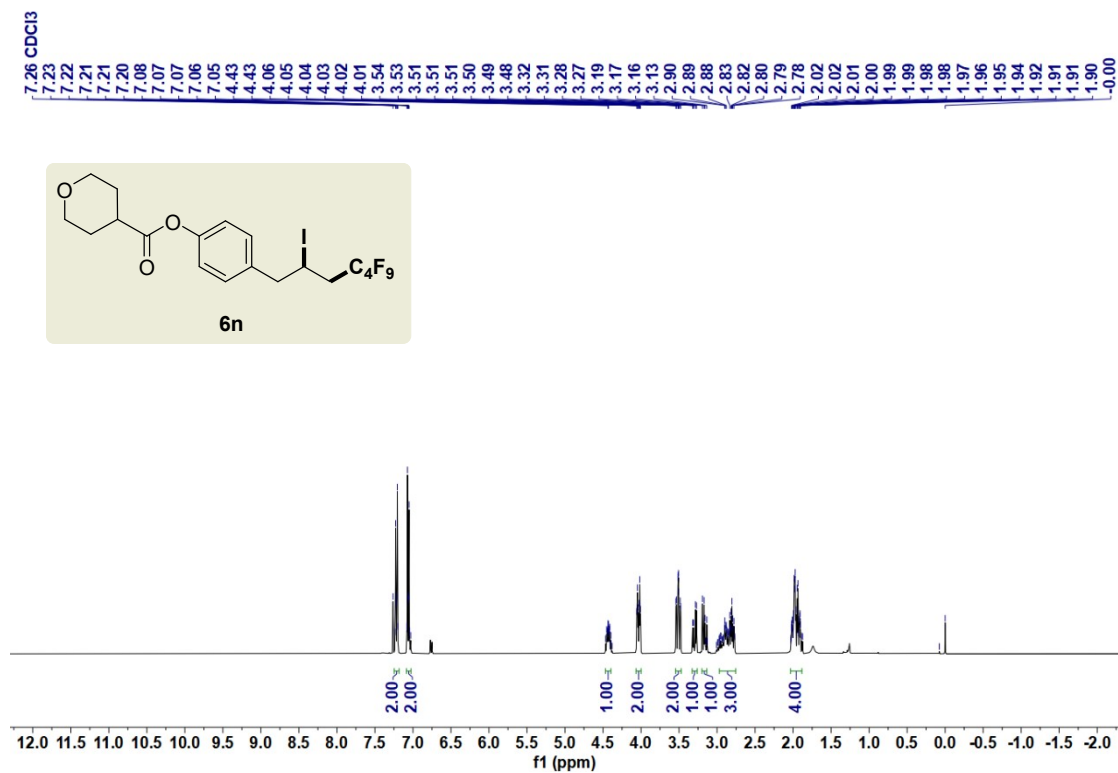



$^1\text{H}$  NMR (400 MHz,  $\text{CDCl}_3$ ) of compound **6o**:

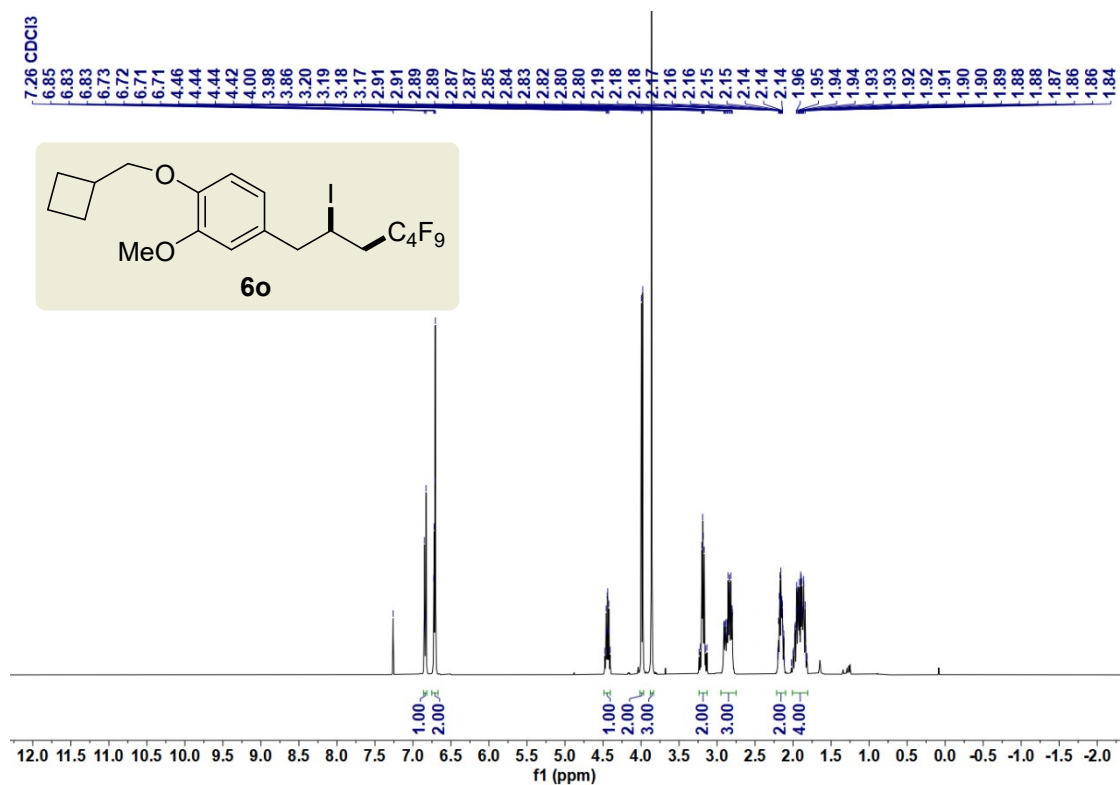

$^{13}\text{C}$  NMR (100 MHz,  $\text{CDCl}_3$ ) of compound **6o**:

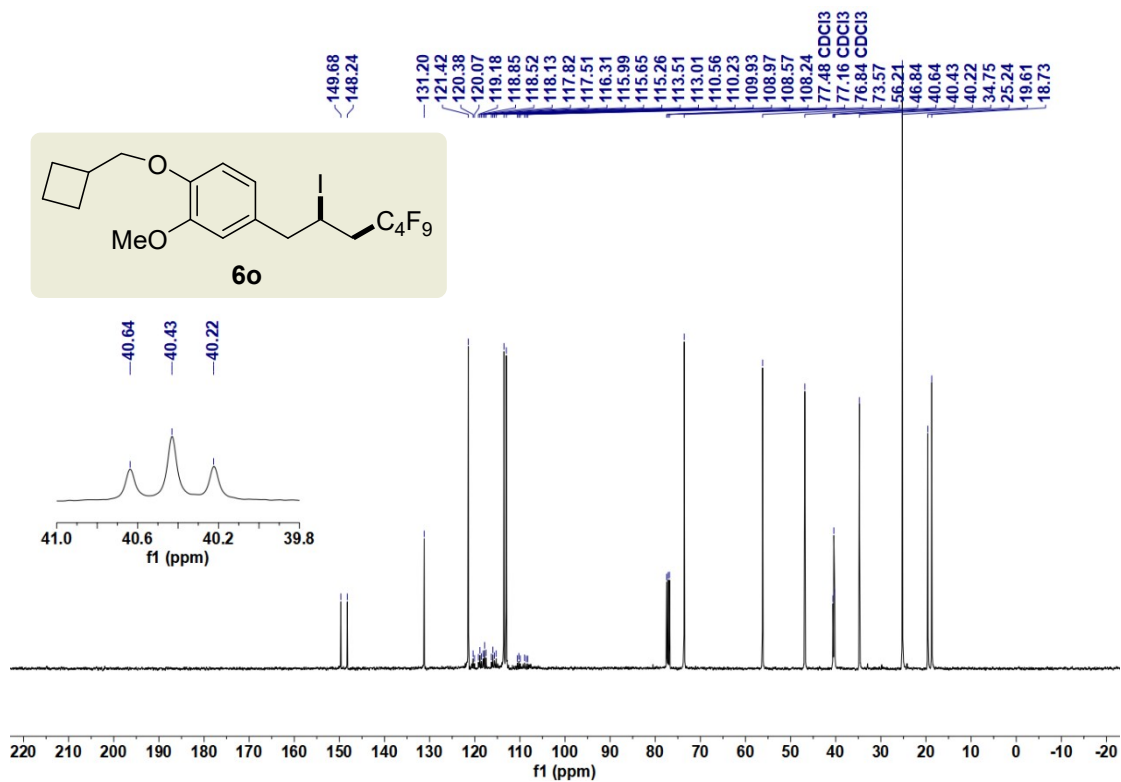



$^{13}\text{C}$  NMR (100 MHz,  $\text{CDCl}_3$ ) of compound **6p**:

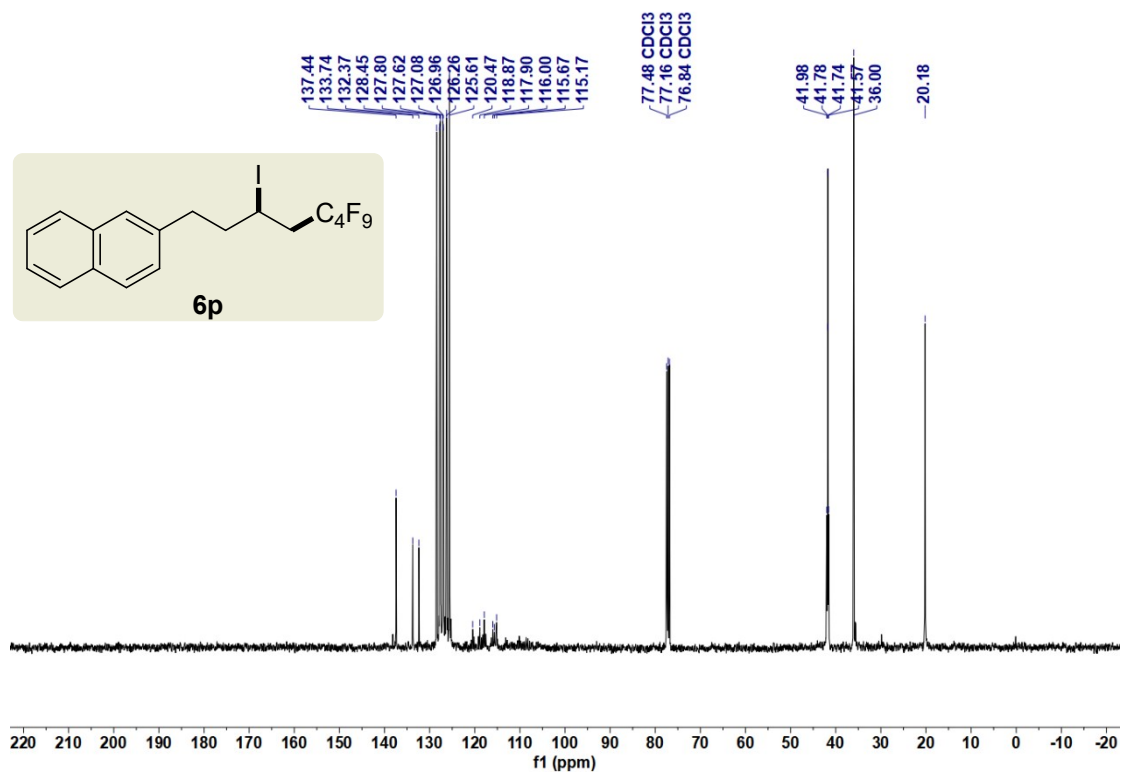

$^{19}\text{F}$  NMR (376 MHz,  $\text{CDCl}_3$ ) of compound **6p**:

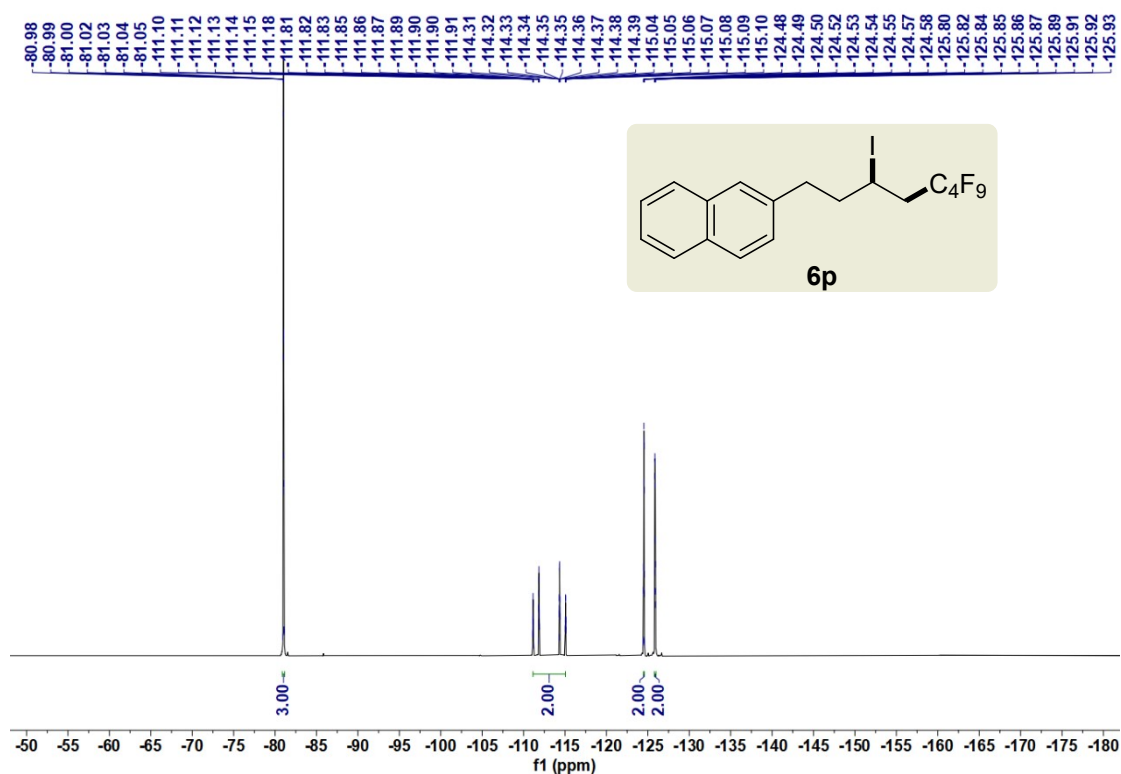

$^1\text{H}$  NMR (400 MHz,  $\text{CDCl}_3$ ) of compound **6q**:

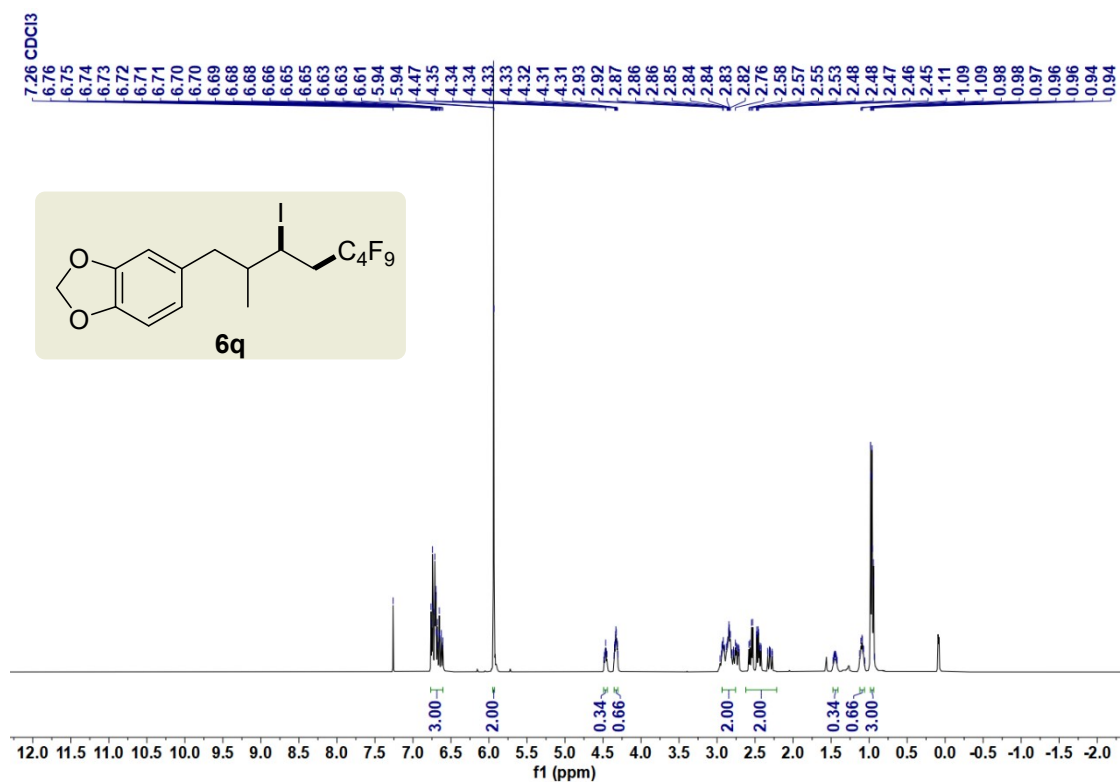

$^{13}\text{C}$  NMR (100 MHz,  $\text{CDCl}_3$ ) of compound **6q**:

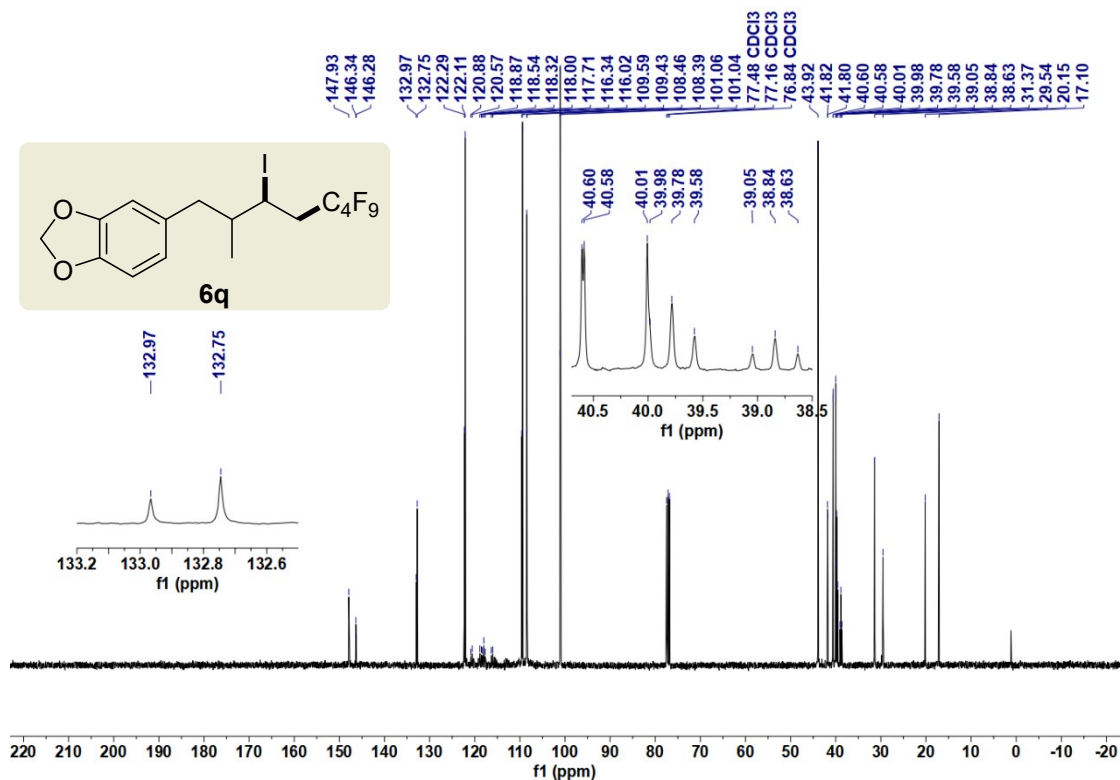

$^{19}\text{F}$  NMR (376 MHz,  $\text{CDCl}_3$ ) of compound **6q**:

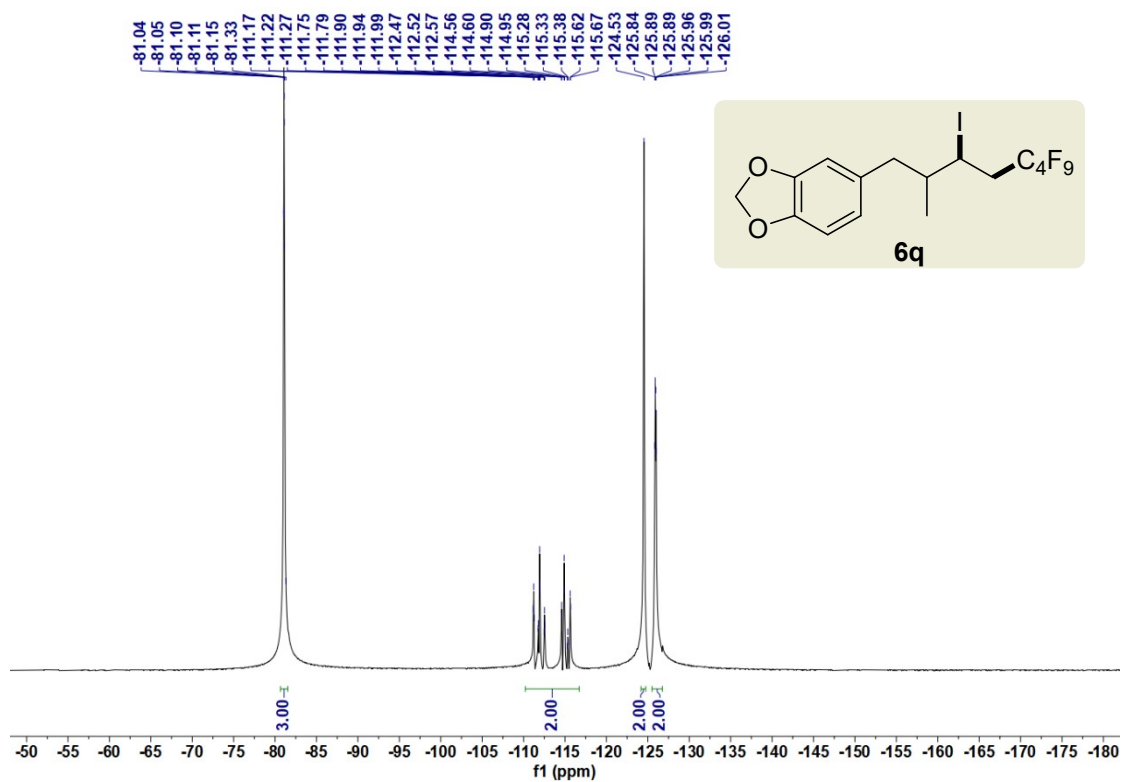

$^1\text{H}$  NMR (400 MHz,  $\text{CDCl}_3$ ) of compound **6r**:

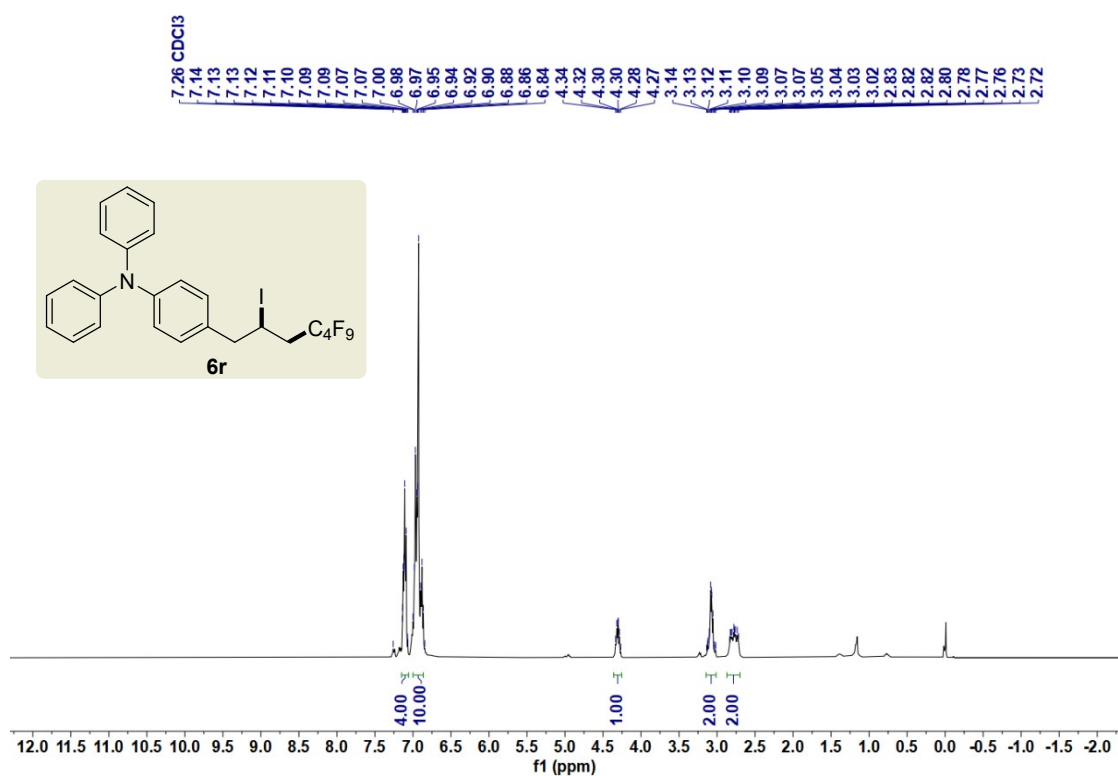





$^1\text{H}$  NMR (400 MHz,  $\text{CDCl}_3$ ) of compound **6s**:

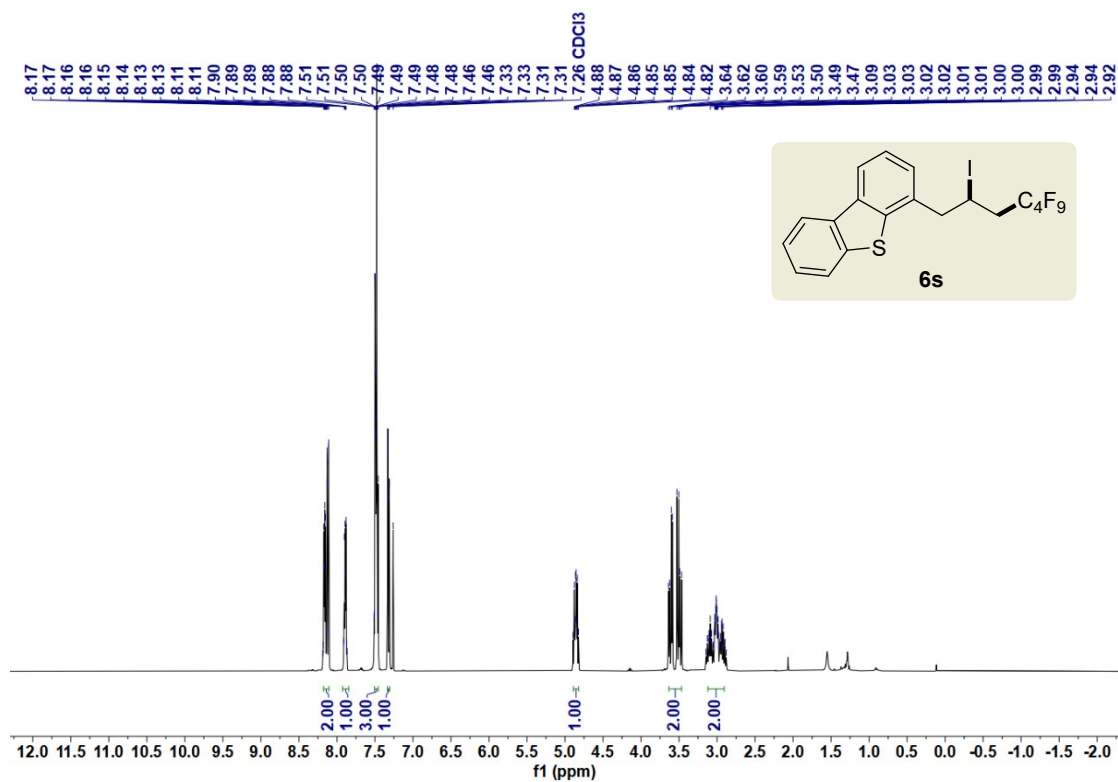

$^{13}\text{C}$  NMR (100 MHz,  $\text{CDCl}_3$ ) of compound **6s**:

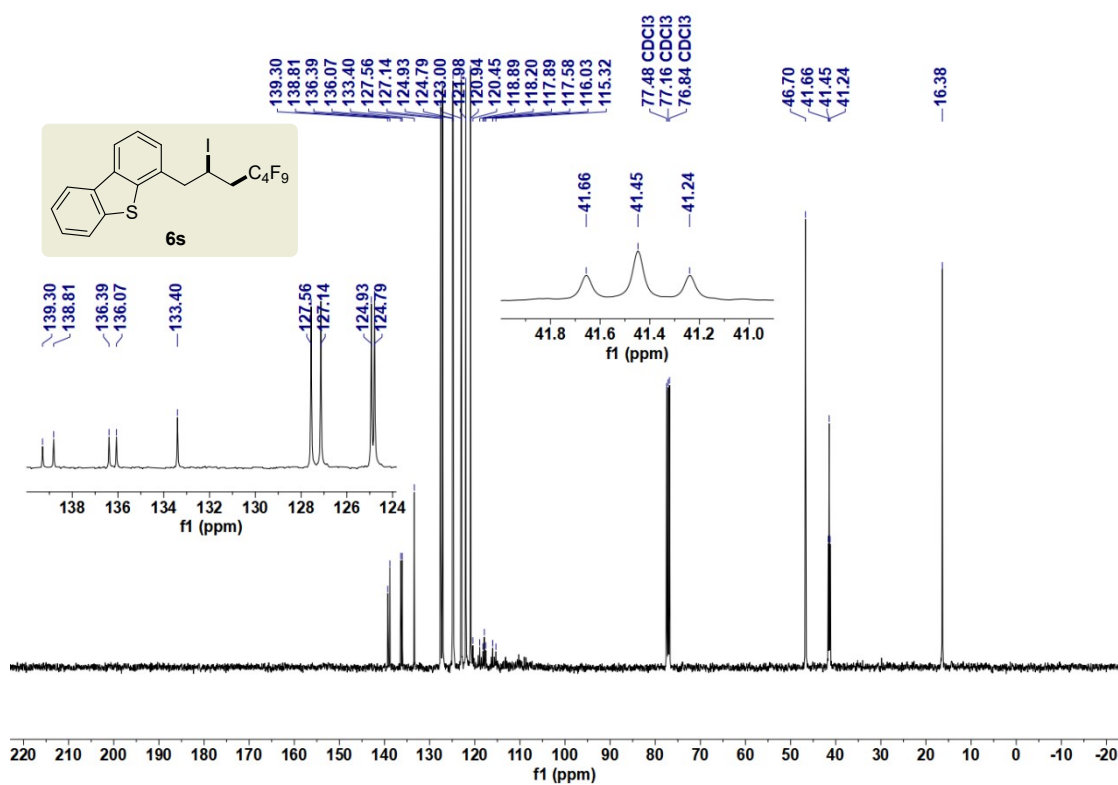

$^{19}\text{F}$  NMR (376 MHz,  $\text{CDCl}_3$ ) of compound **6s**:

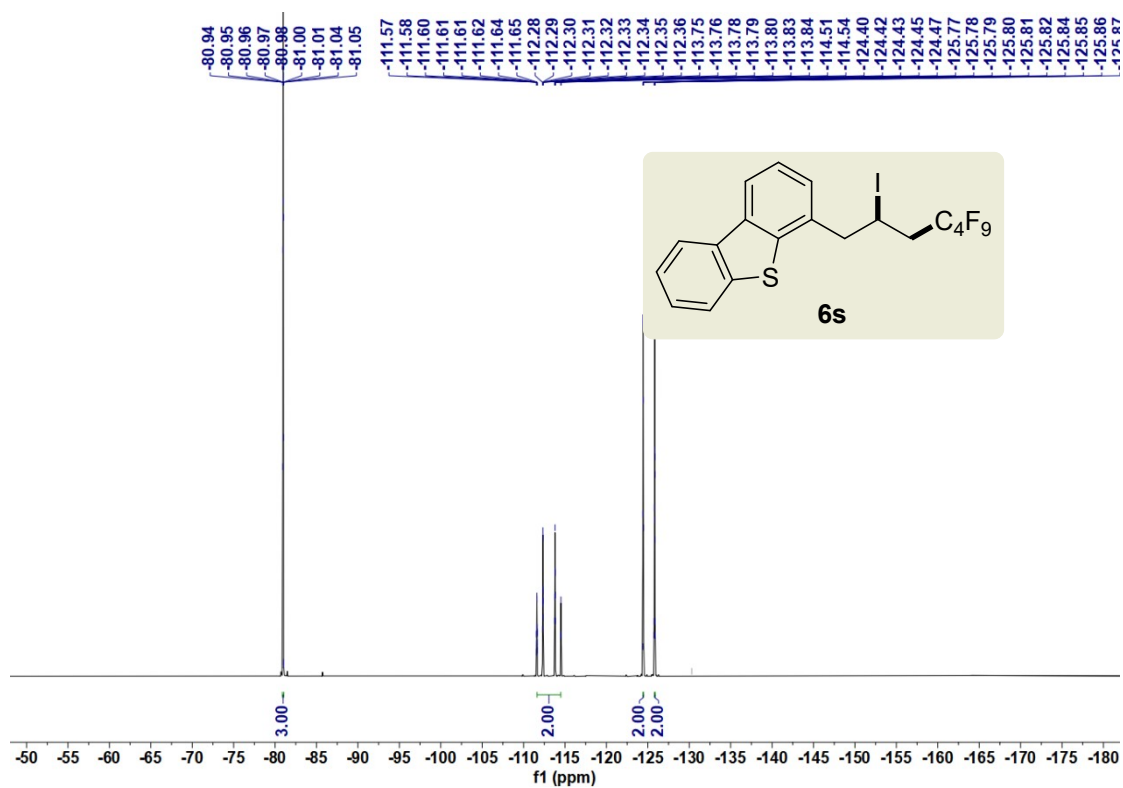

$^1\text{H}$  NMR (400 MHz,  $\text{CDCl}_3$ ) of compound **6t**:

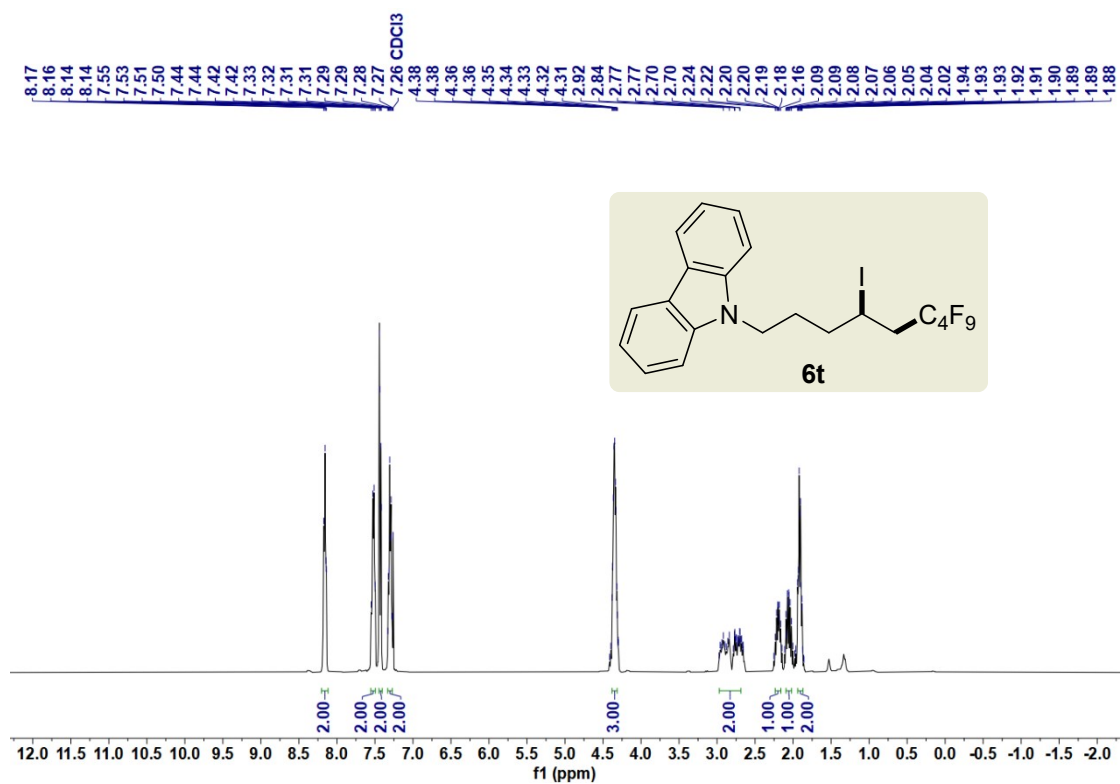



$^1\text{H}$  NMR (400 MHz,  $\text{CDCl}_3$ ) of compound **6u**:

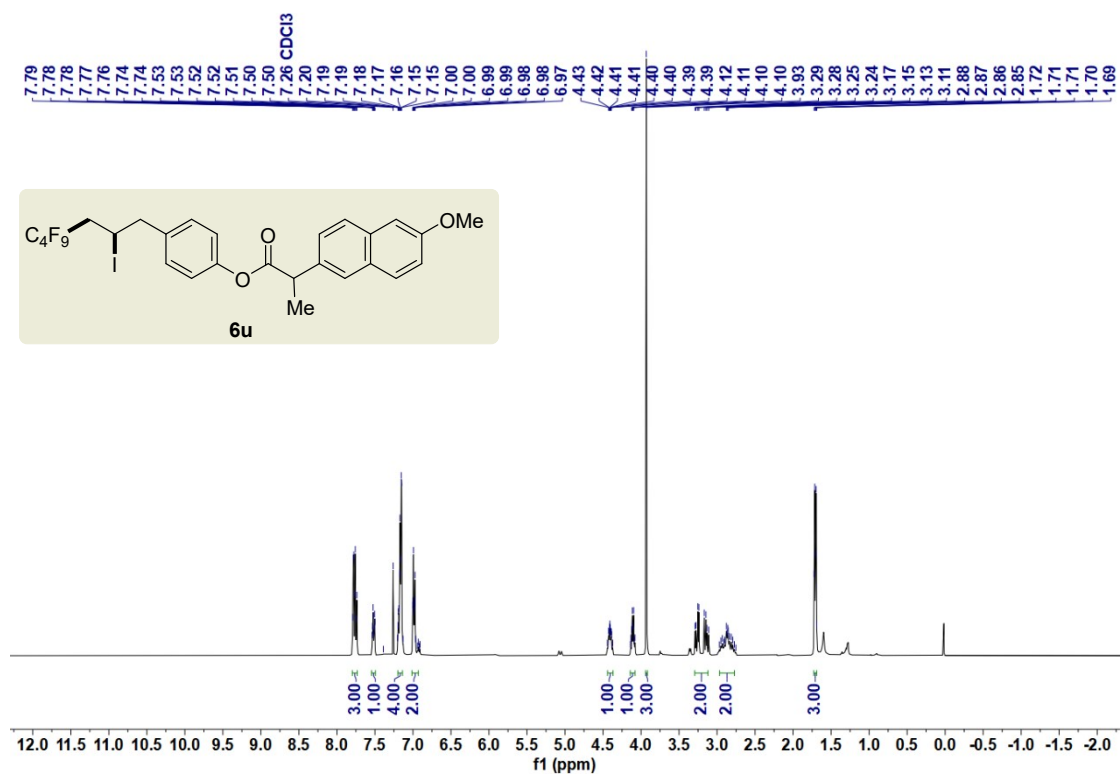

$^{13}\text{C}$  NMR (100 MHz,  $\text{CDCl}_3$ ) of compound **6u**:

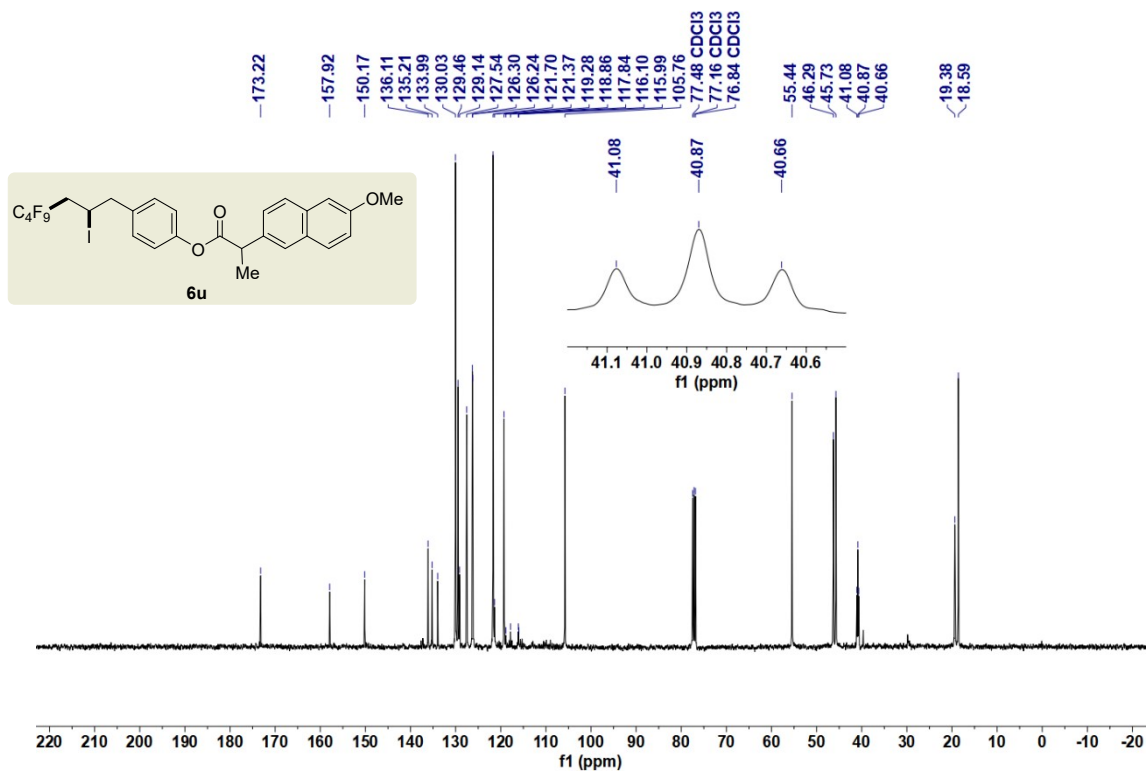





$^1\text{H}$  NMR (400 MHz,  $\text{CDCl}_3$ ) of compound **6v**:

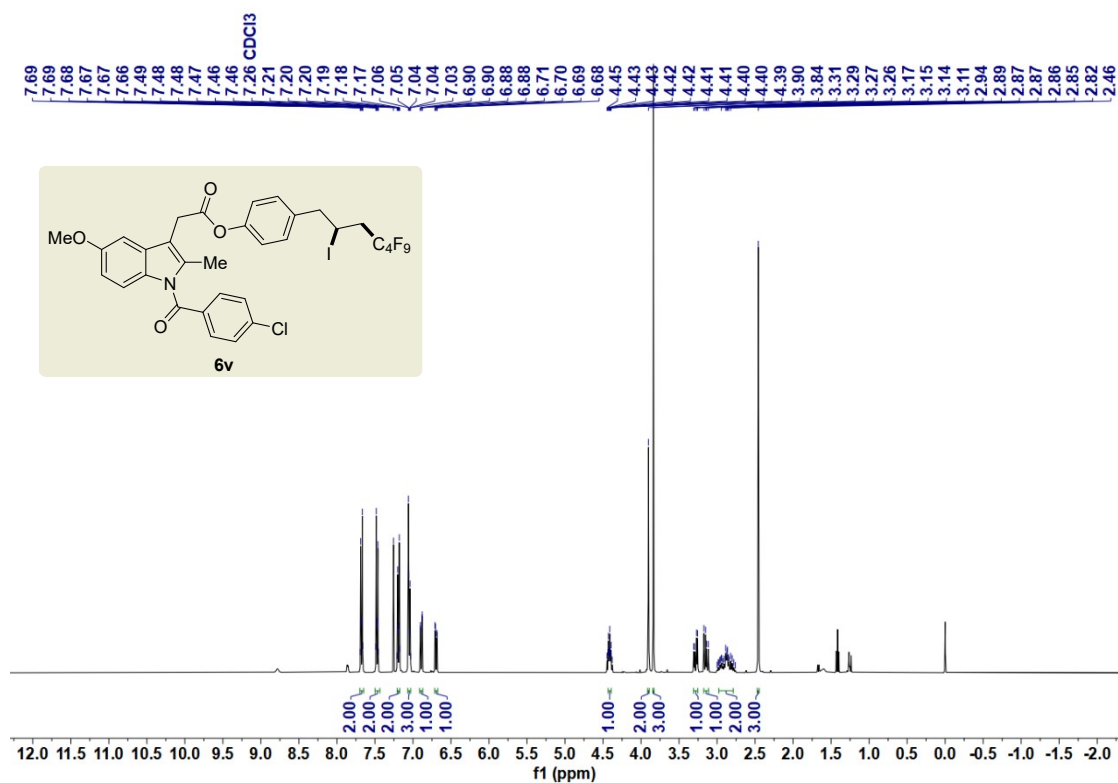

$^{13}\text{C}$  NMR (100 MHz,  $\text{CDCl}_3$ ) of compound **6v**:

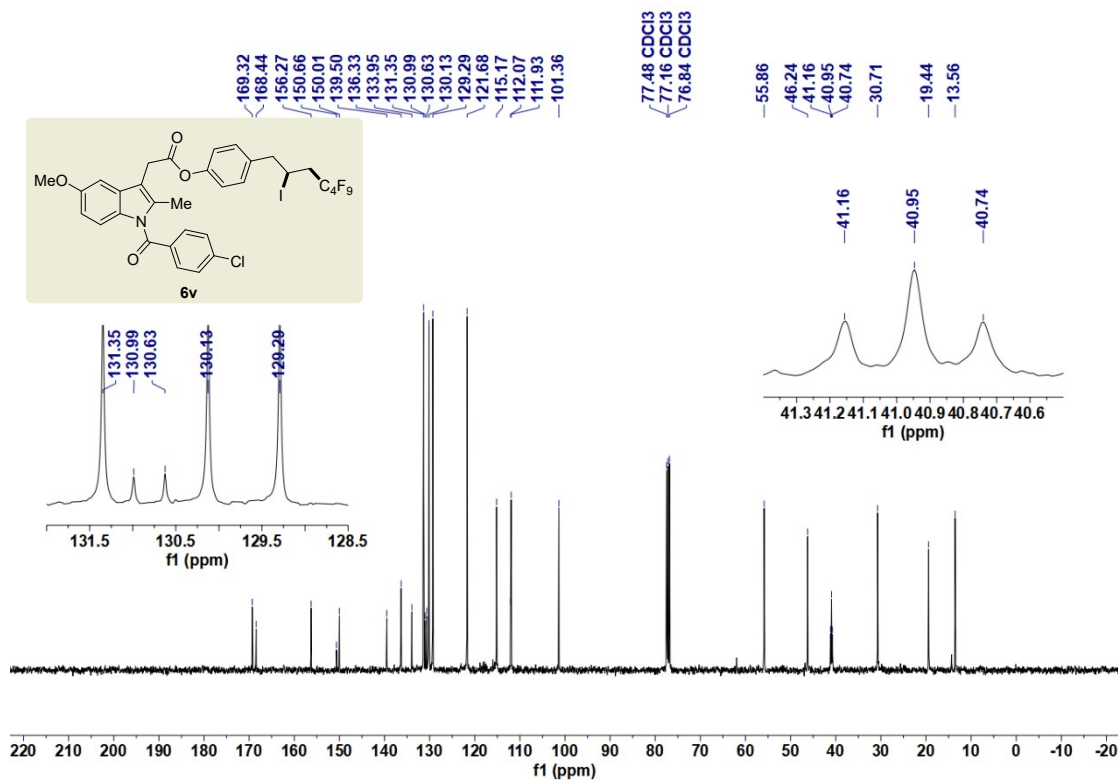

$^{19}\text{F}$  NMR (376 MHz,  $\text{CDCl}_3$ ) of compound **6v**:

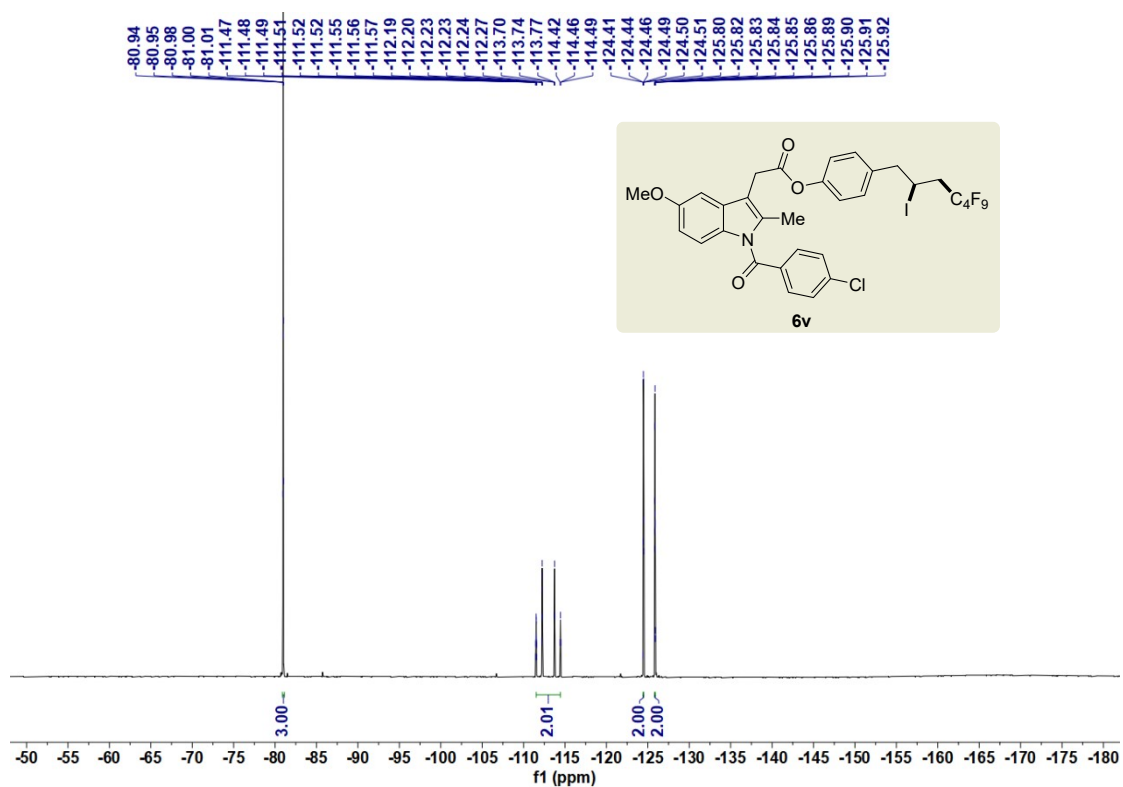

$^1\text{H}$  NMR (400 MHz,  $\text{CDCl}_3$ ) of compound **6x**:

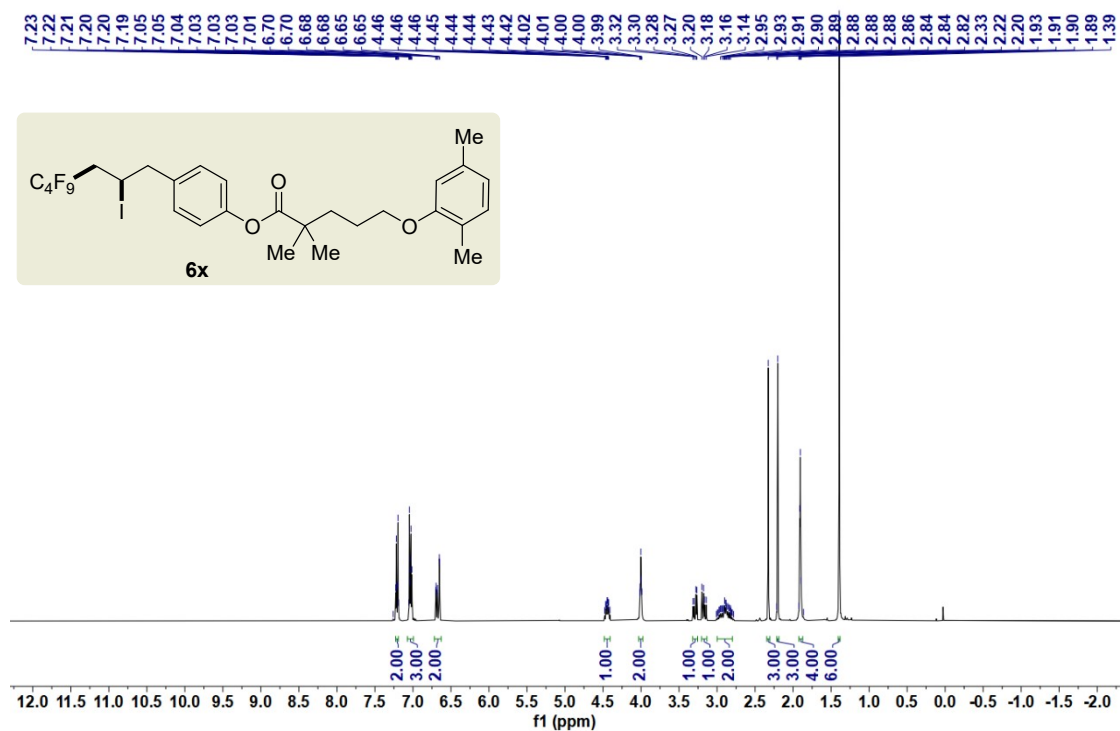



$^{13}\text{C}$  NMR (100 MHz,  $\text{CDCl}_3$ ) of compound **6x**:

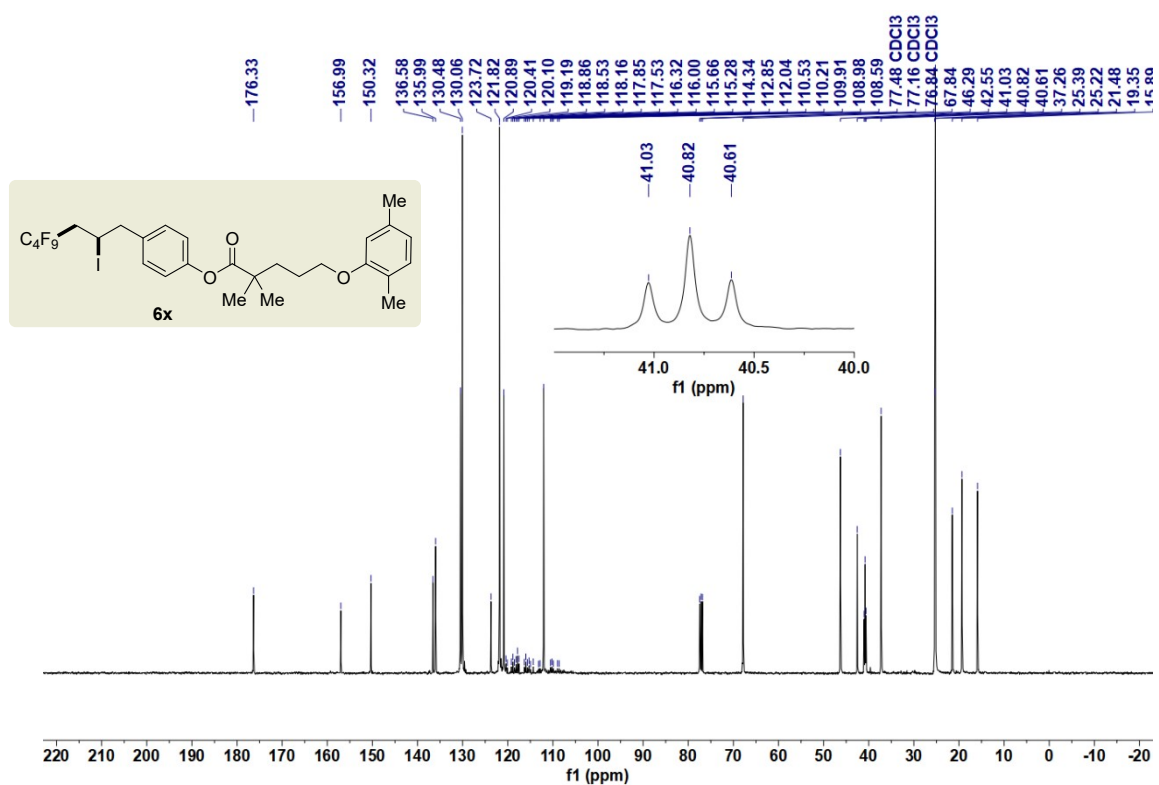

$^{19}\text{F}$  NMR (376 MHz,  $\text{CDCl}_3$ ) of compound **6x**:

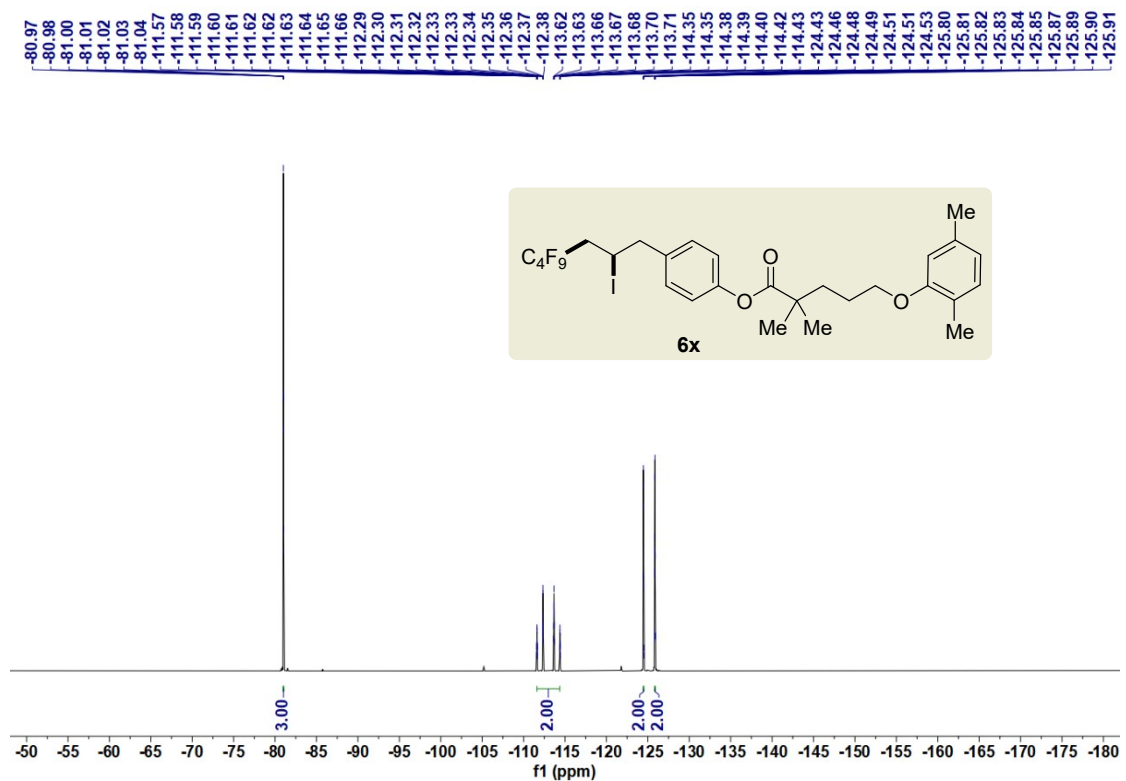



$^{19}\text{F}$  NMR (376 MHz,  $\text{CDCl}_3$ ) of compound **4**:

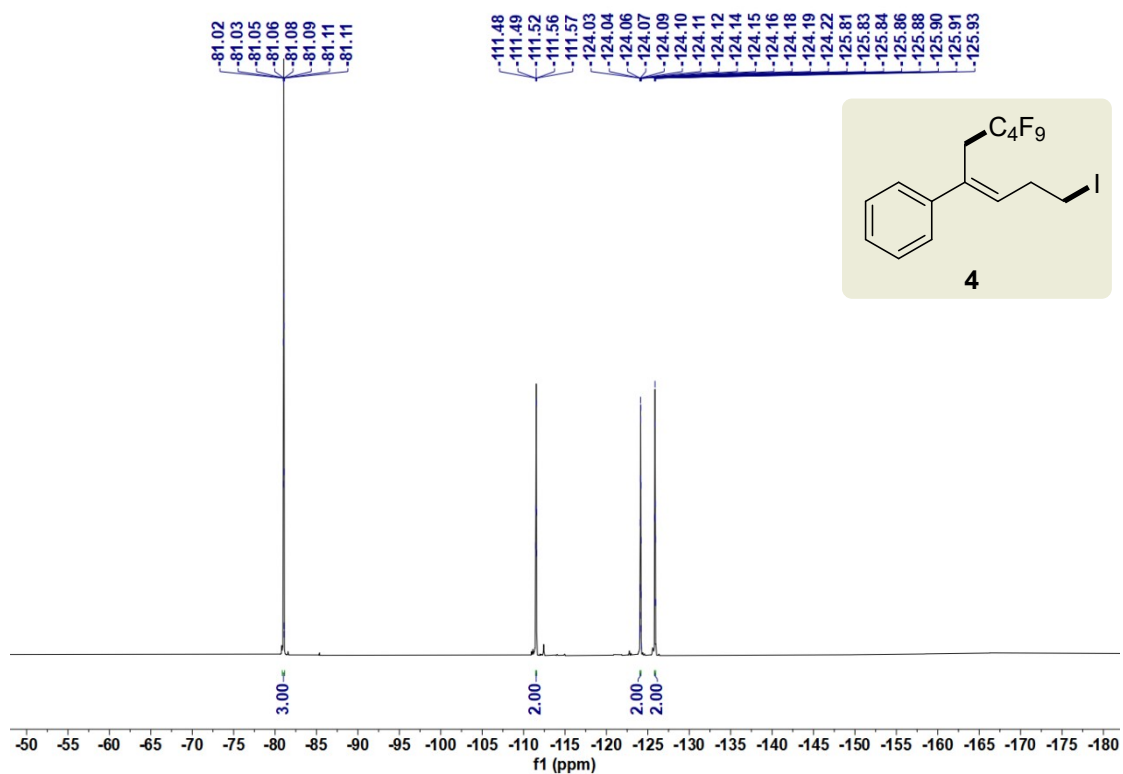

$^1\text{H}$  NMR (400 MHz,  $\text{CDCl}_3$ ) of compound **3ga**:

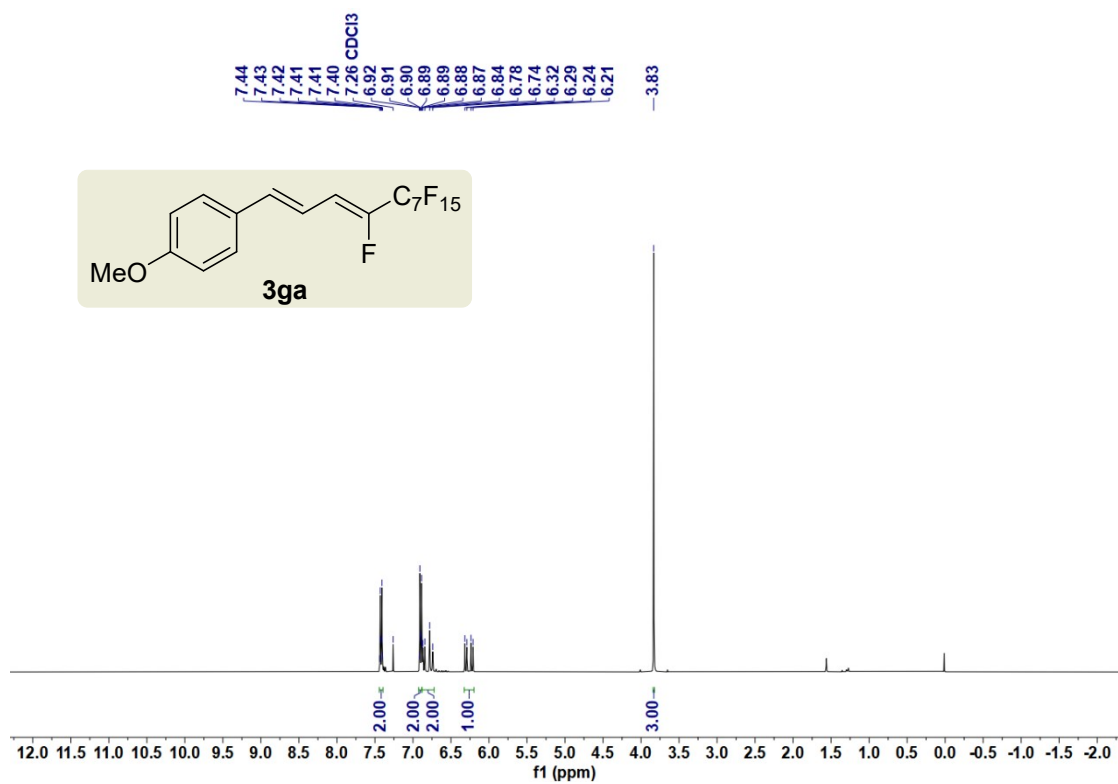

$^{13}\text{C}$  NMR (100 MHz,  $\text{CDCl}_3$ ) of compound **3ga**:

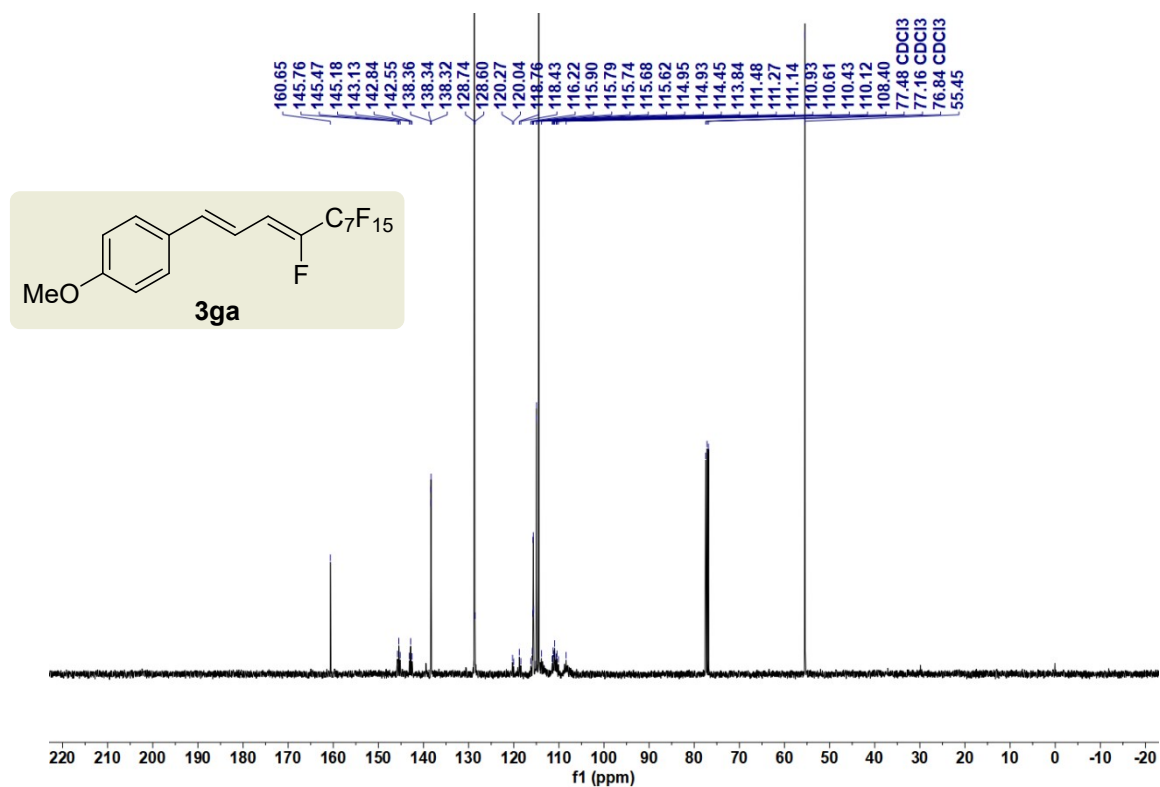

$^{19}\text{F}$  NMR (376 MHz,  $\text{CDCl}_3$ ) of compound **3ga**:

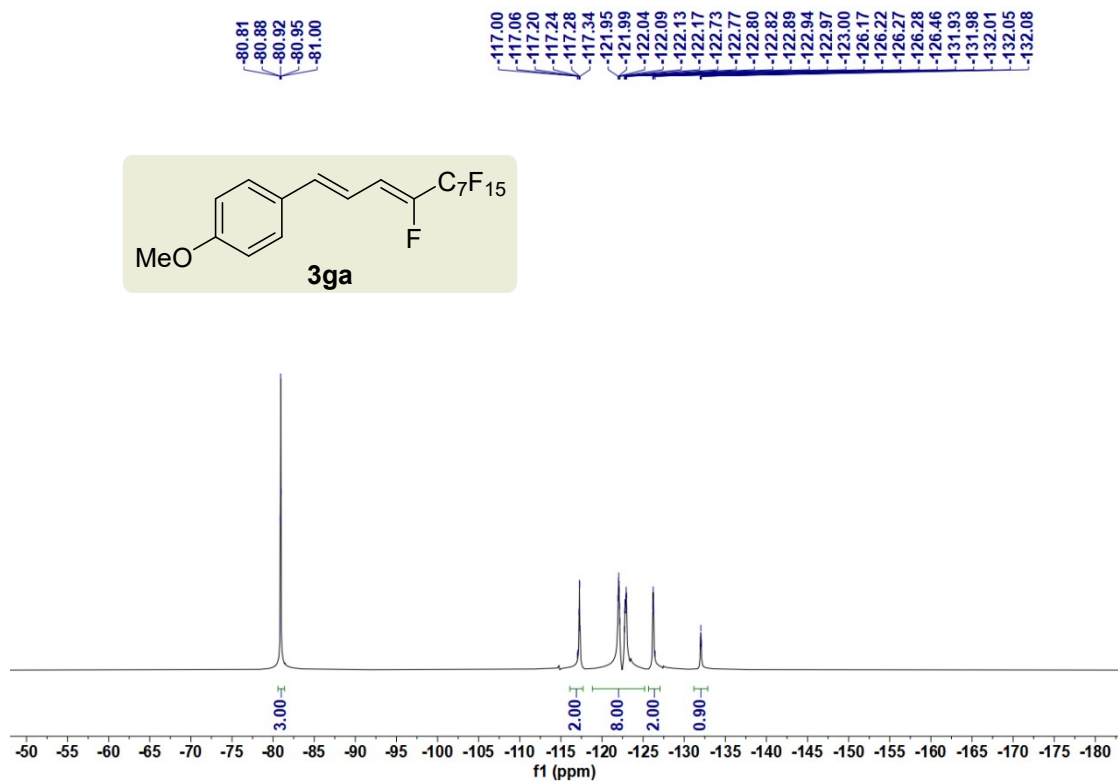

$^1\text{H}$  NMR (400 MHz,  $\text{CDCl}_3$ ) of compound **3gb**:

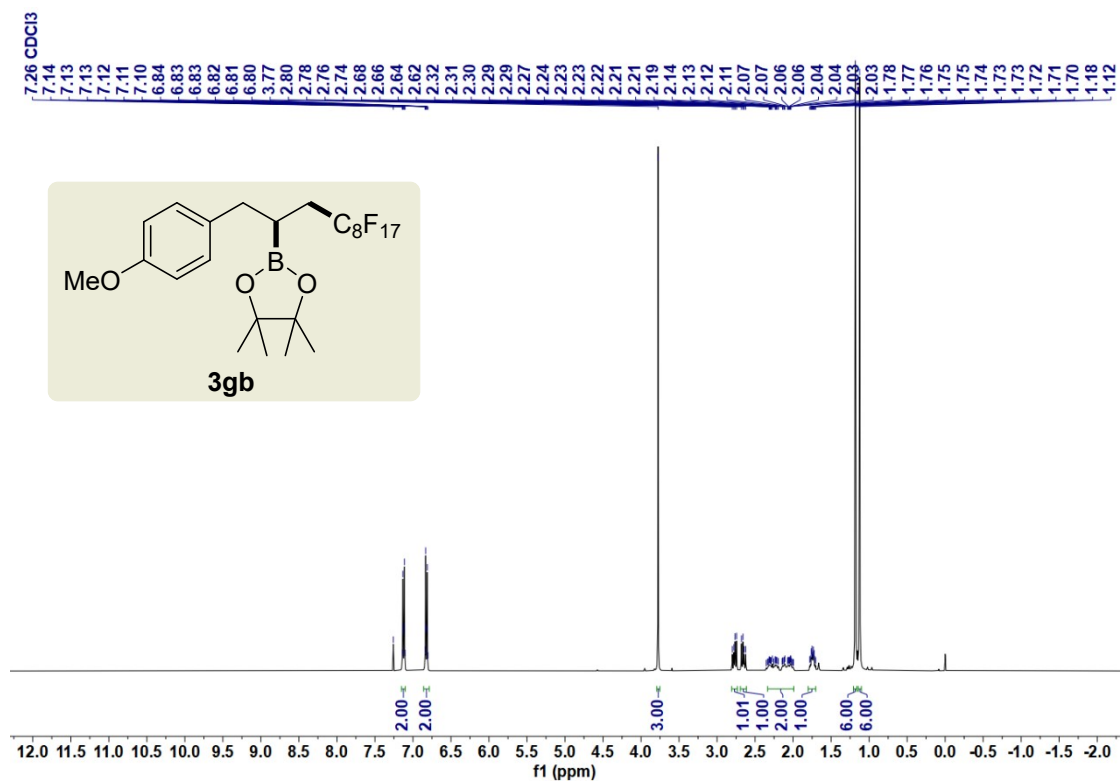

$^{13}\text{C}$  NMR (100 MHz,  $\text{CDCl}_3$ ) of compound **3gb**:

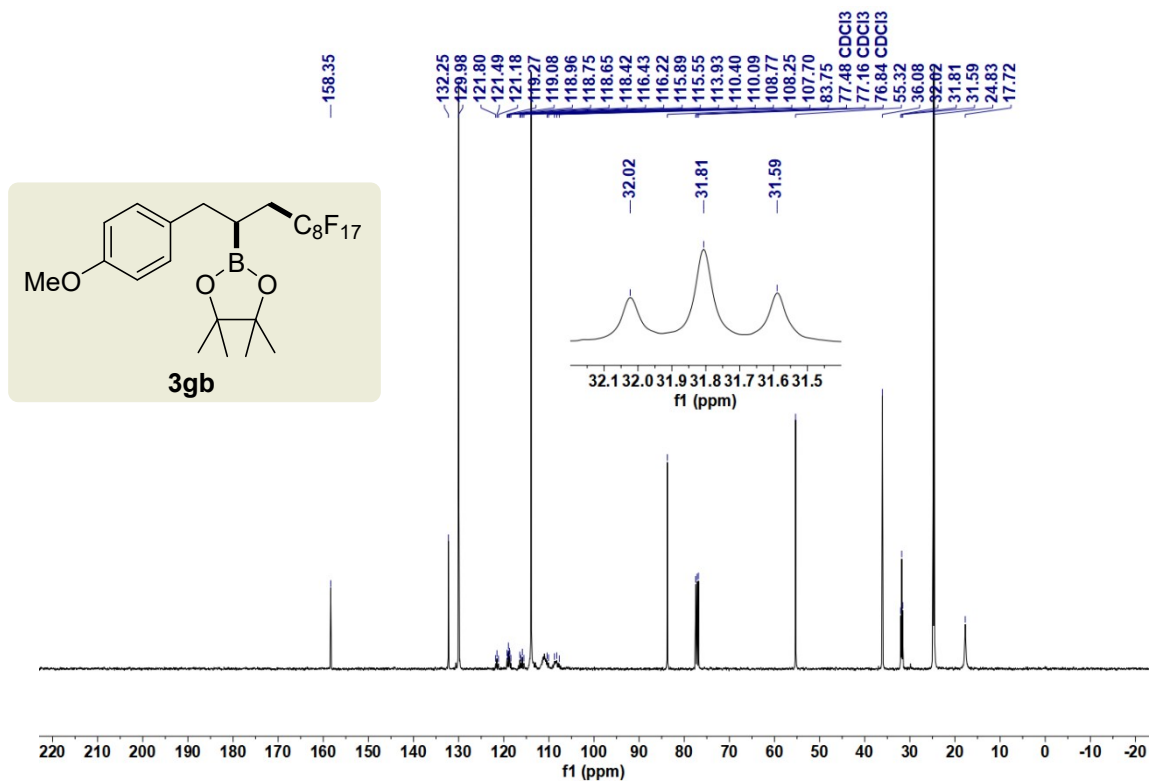

$^{19}\text{F}$  NMR (376 MHz,  $\text{CDCl}_3$ ) of compound **3gb**:

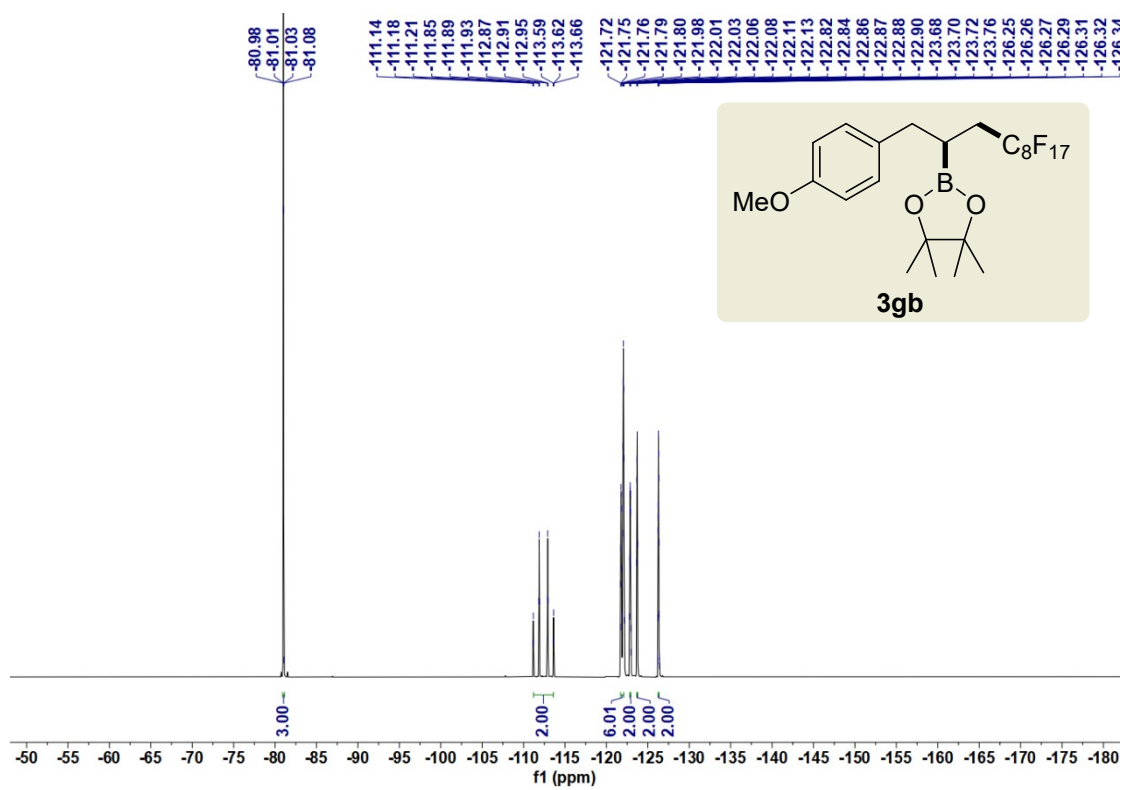

$^{11}\text{B}$  NMR (128 MHz,  $\text{CDCl}_3$ ) of compound **3gb**:

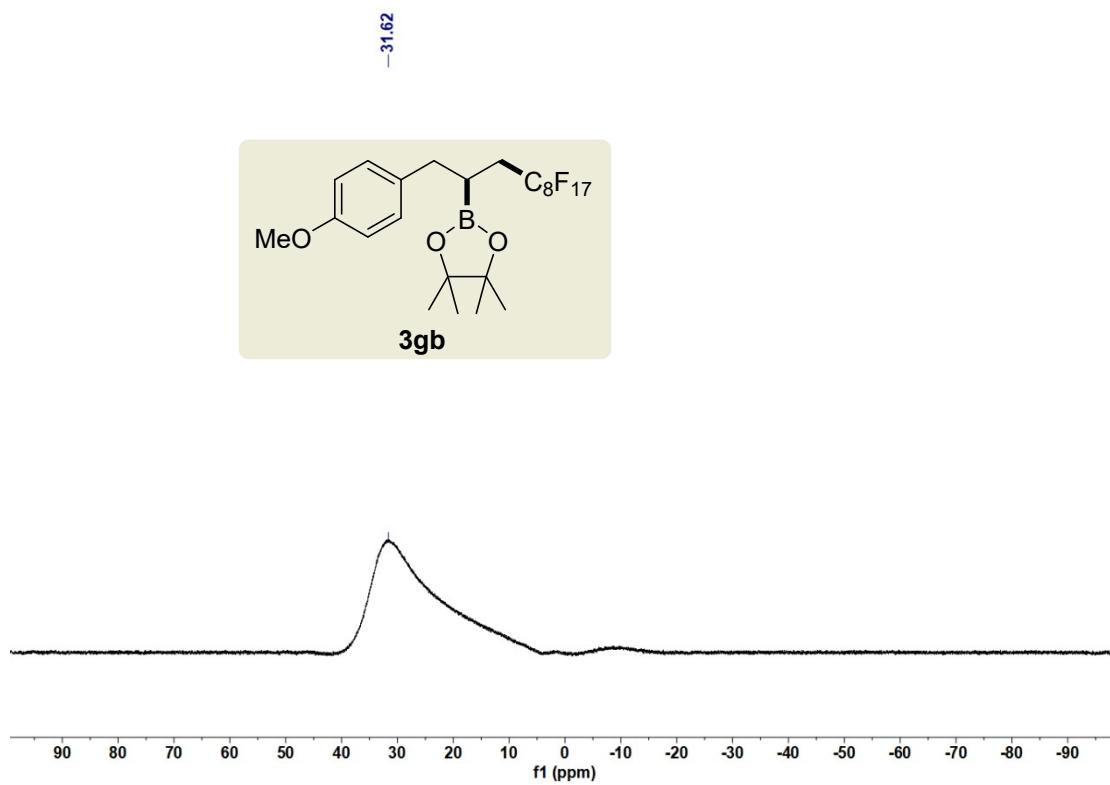

$^1\text{H}$  NMR (400 MHz,  $\text{CDCl}_3$ ) of compound **5m**:

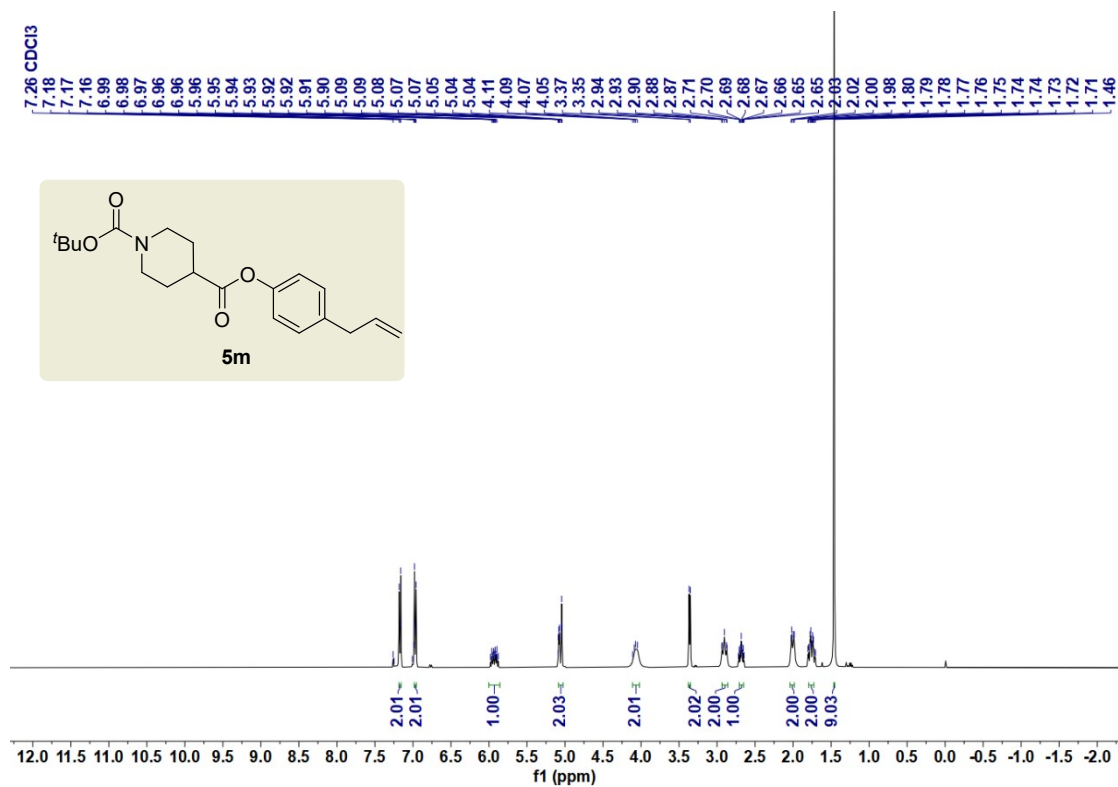

$^{13}\text{C}$  NMR (100 MHz,  $\text{CDCl}_3$ ) of compound **5m**:

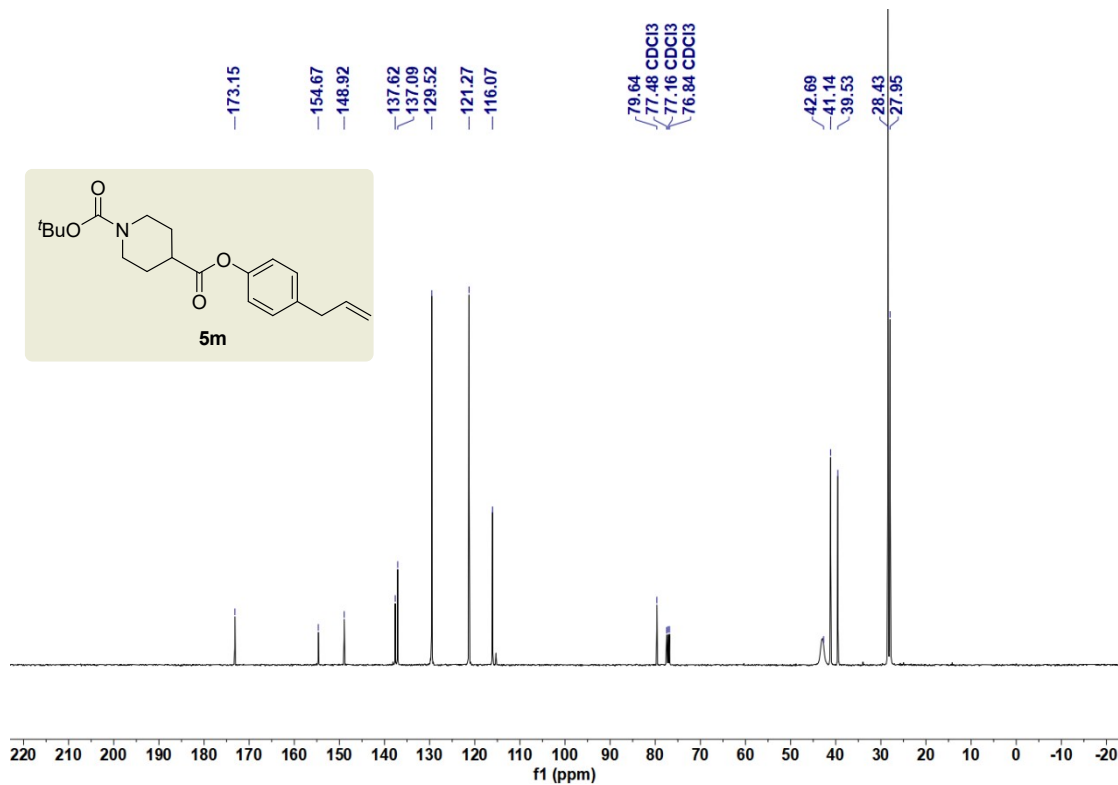

$^1\text{H}$  NMR (400 MHz,  $\text{CDCl}_3$ ) of compound **5u**:

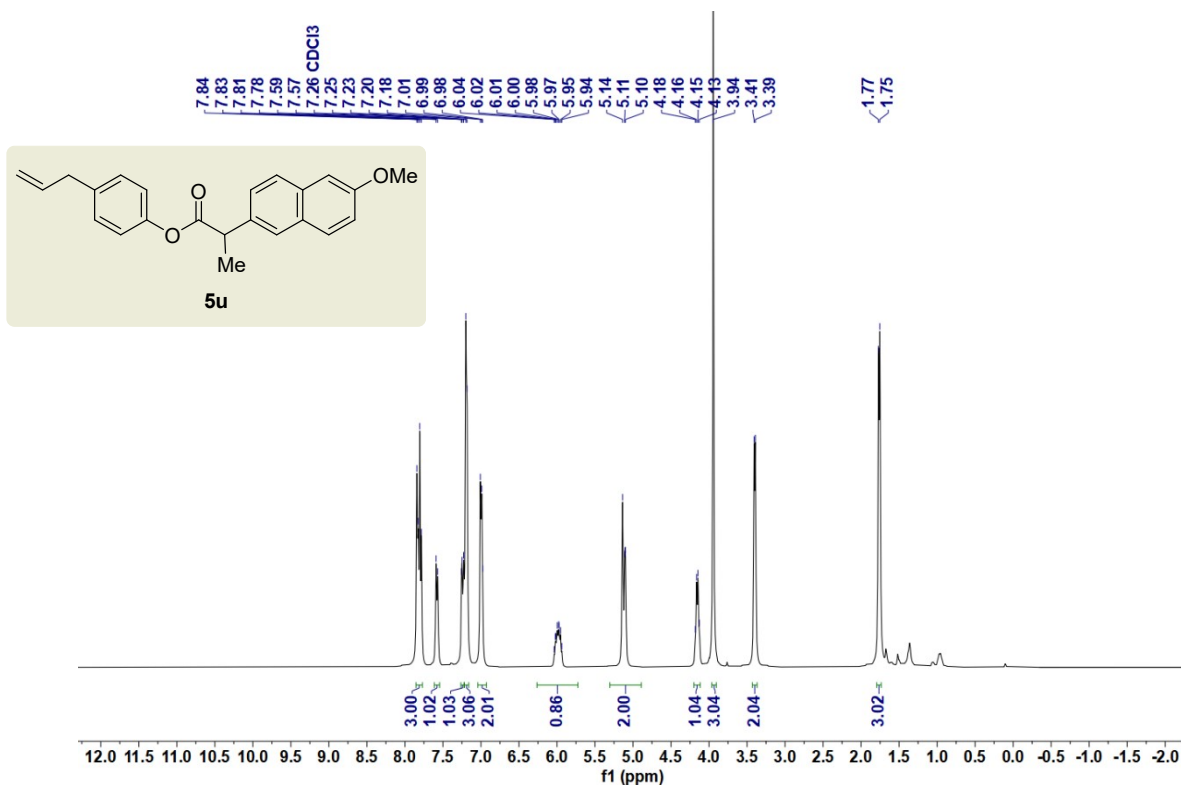

$^{13}\text{C}$  NMR (100 MHz,  $\text{CDCl}_3$ ) of compound **5u**:

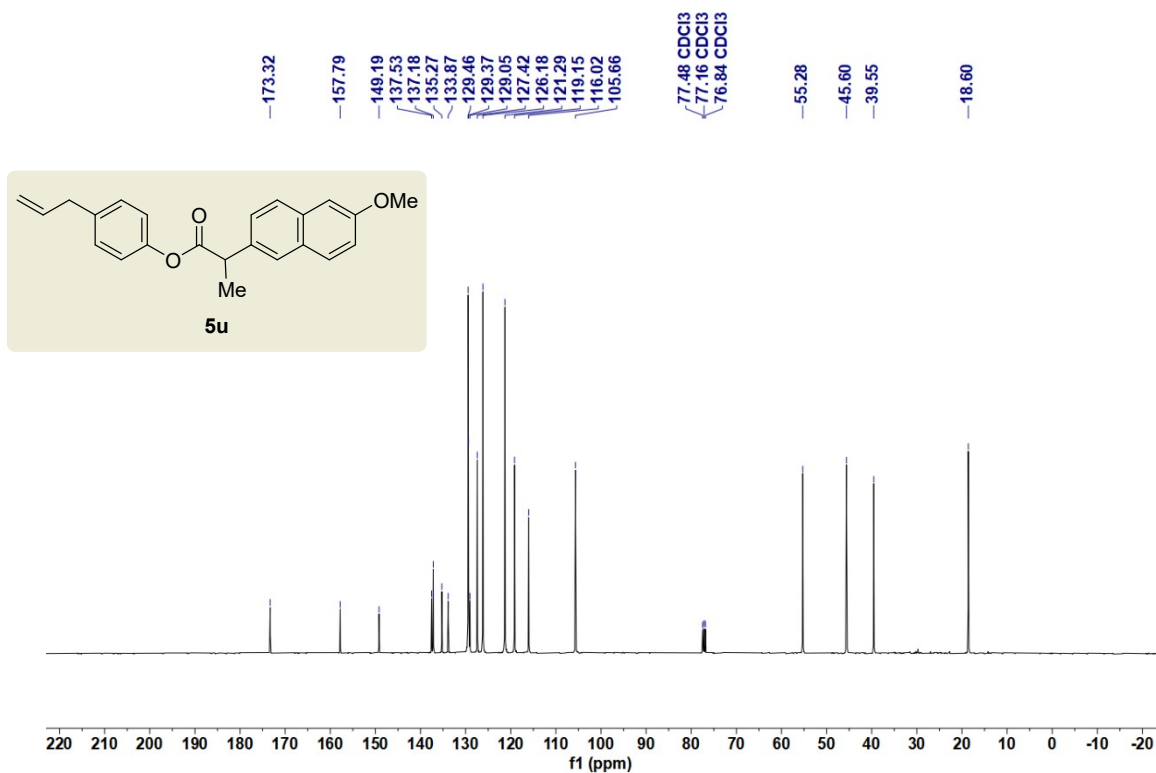



$^1\text{H}$  NMR (400 MHz,  $\text{CDCl}_3$ ) of compound **5v**:

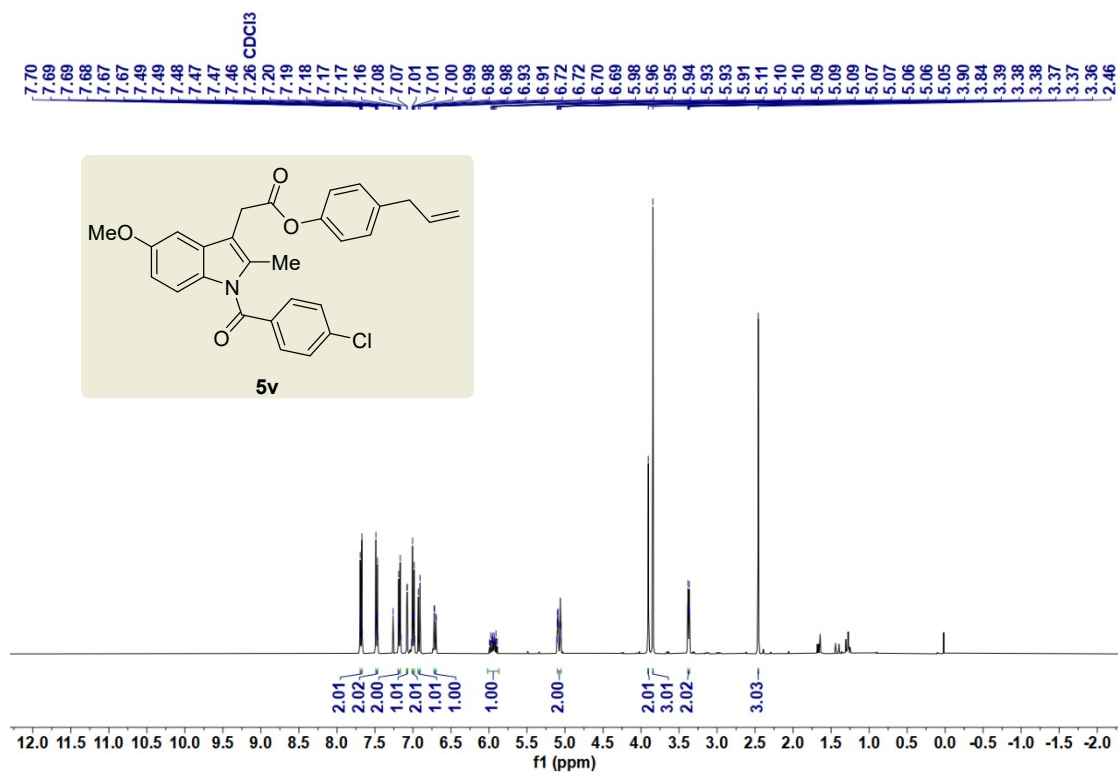

$^{13}\text{C}$  NMR (100 MHz,  $\text{CDCl}_3$ ) of compound **5v**:

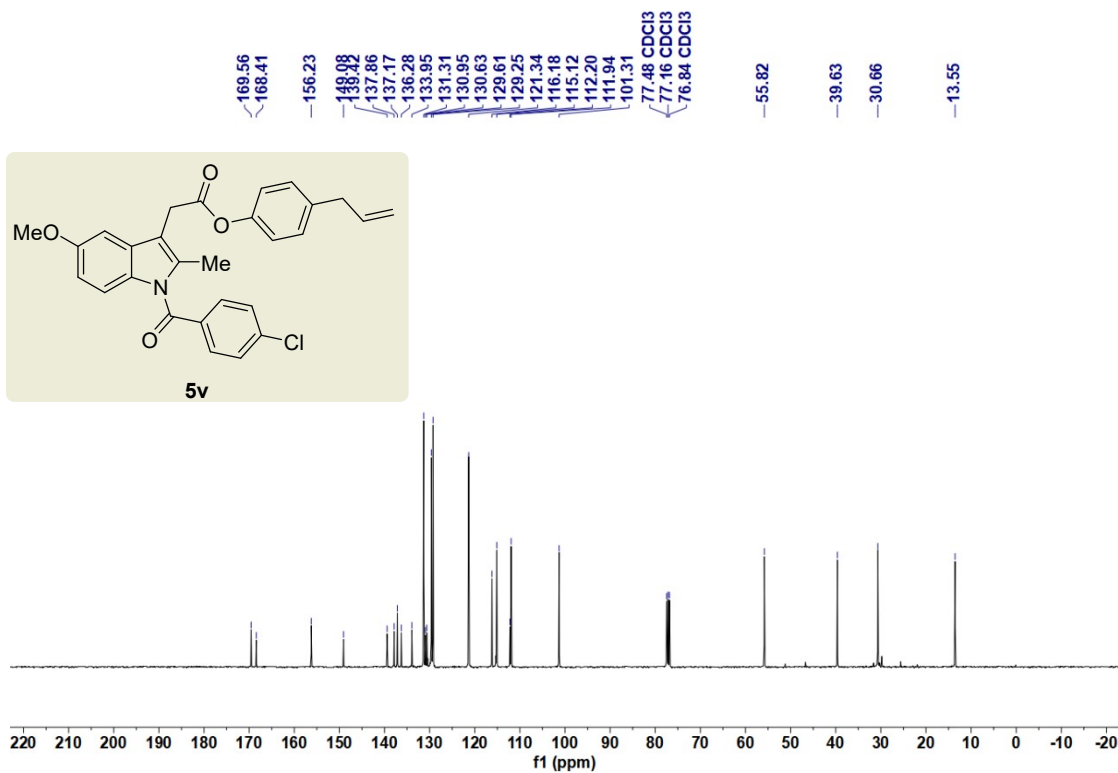

$^1\text{H}$  NMR (400 MHz,  $\text{CDCl}_3$ ) of compound **5x**:

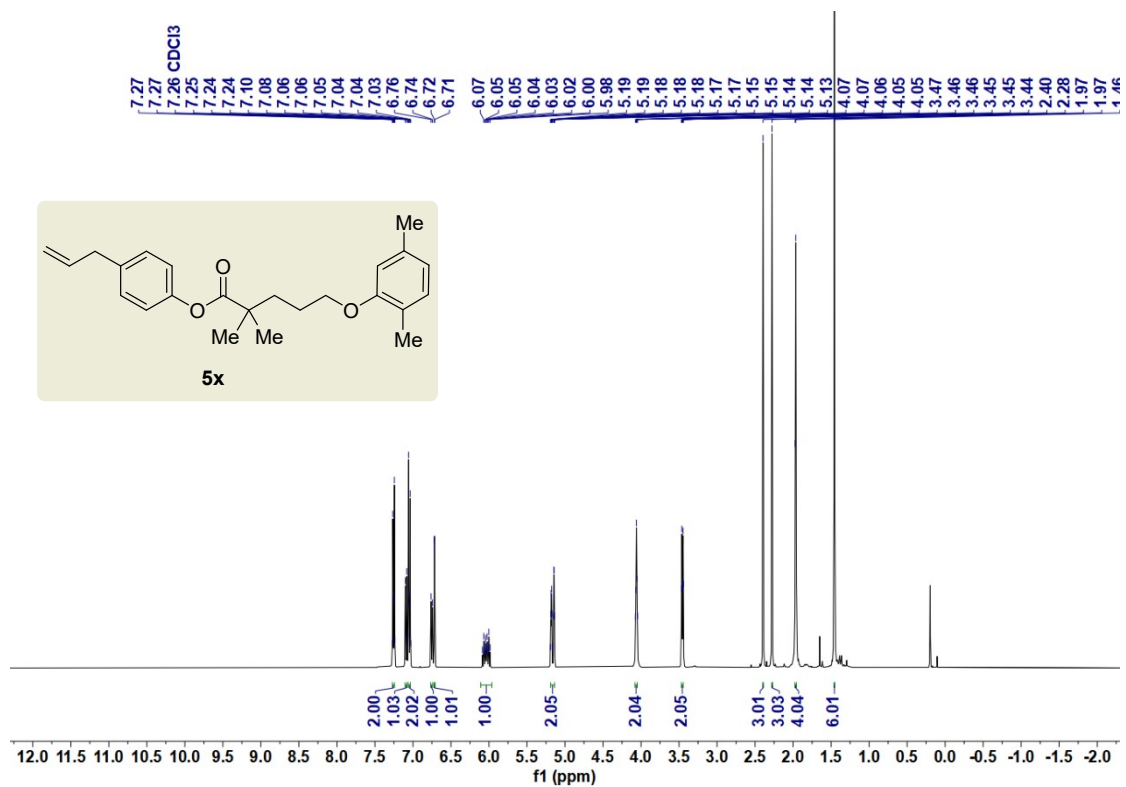

$^{13}\text{C}$  NMR (100 MHz,  $\text{CDCl}_3$ ) of compound **5x**:

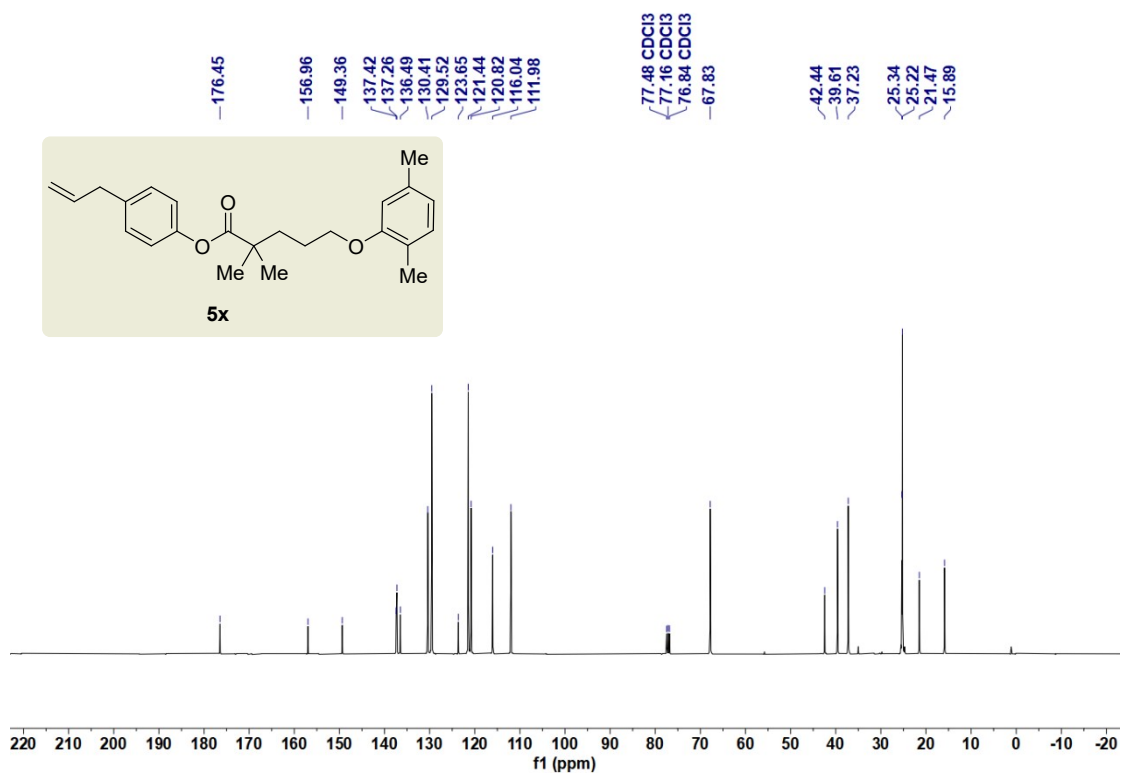

## 7. Cartesian Coordinates of the Optimized Structures

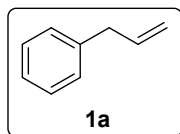

Zero-point correction= 0.163278 (Hartree/Particle)  
Thermal correction to Energy= 0.171342  
Thermal correction to Enthalpy= 0.172287  
Thermal correction to Gibbs Free Energy= 0.129613  
Sum of electronic and zero-point Energies= -348.638067  
Sum of electronic and thermal Energies= -348.630002  
Sum of electronic and thermal Enthalpies= -348.629058  
Sum of electronic and thermal Free Energies= -348.671732

Esol= -348.9191033

| Center Number | Atomic Number | Atomic Type | Coordinates (Angstroms) |           |           |
|---------------|---------------|-------------|-------------------------|-----------|-----------|
|               |               |             | X                       | Y         | Z         |
| 1             | 6             | 0           | 0.005662                | -0.384479 | 0.187689  |
| 2             | 6             | 0           | 1.593754                | 1.441117  | 0.058208  |
| 3             | 6             | 0           | 2.635702                | 0.535190  | -0.129829 |
| 4             | 6             | 0           | 2.362865                | -0.828697 | -0.161509 |
| 5             | 6             | 0           | 1.055342                | -1.282753 | -0.004762 |
| 6             | 1             | 0           | 1.798181                | 2.506991  | 0.081483  |
| 7             | 1             | 0           | 3.653231                | 0.891548  | -0.253663 |
| 8             | 1             | 0           | 3.167411                | -1.541845 | -0.311265 |
| 9             | 1             | 0           | 0.846132                | -2.349101 | -0.031467 |
| 10            | 6             | 0           | -2.399845               | -0.153377 | -0.504423 |
| 11            | 1             | 0           | -2.217576               | -0.226972 | -1.575884 |
| 12            | 6             | 0           | -3.428235               | 0.561169  | -0.058523 |
| 13            | 1             | 0           | -4.107812               | 1.067342  | -0.735807 |
| 14            | 1             | 0           | -3.627245               | 0.658250  | 1.005747  |
| 15            | 6             | 0           | 0.289639                | 0.983701  | 0.213225  |
| 16            | 1             | 0           | -0.525817               | 1.689184  | 0.349739  |
| 17            | 6             | 0           | -1.417728               | -0.872571 | 0.378926  |
| 18            | 1             | 0           | -1.716786               | -0.742517 | 1.426178  |
| 19            | 1             | 0           | -1.452657               | -1.948682 | 0.170927  |

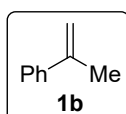

Zero-point correction= 0.163146 (Hartree/Particle)  
Thermal correction to Energy= 0.171223  
Thermal correction to Enthalpy= 0.172167  
Thermal correction to Gibbs Free Energy= 0.130057

---

Sum of electronic and zero-point Energies= -348.645420  
 Sum of electronic and thermal Energies= -348.637344  
 Sum of electronic and thermal Enthalpies= -348.636400  
 Sum of electronic and thermal Free Energies= -348.678510

Esol= -348.9255457

---

| Center<br>Number | Atomic<br>Number | Atomic<br>Type | Coordinates (Angstroms) |           |           |
|------------------|------------------|----------------|-------------------------|-----------|-----------|
|                  |                  |                | X                       | Y         | Z         |
| 1                | 6                | 0              | -1.943340               | 1.137060  | 0.275522  |
| 2                | 6                | 0              | -0.554173               | 1.184981  | 0.265145  |
| 3                | 6                | 0              | 0.204908                | 0.042843  | -0.020547 |
| 4                | 6                | 0              | -0.473157               | -1.155843 | -0.271650 |
| 5                | 6                | 0              | -1.863674               | -1.205001 | -0.264515 |
| 6                | 6                | 0              | -2.604748               | -0.058925 | 0.007798  |
| 7                | 1                | 0              | -2.510943               | 2.033388  | 0.504897  |
| 8                | 1                | 0              | -0.041560               | 2.112054  | 0.502647  |
| 9                | 1                | 0              | 0.087752                | -2.058119 | -0.493413 |
| 10               | 1                | 0              | -2.368991               | -2.142753 | -0.472902 |
| 11               | 6                | 0              | 1.691580                | 0.110445  | -0.048155 |
| 12               | 6                | 0              | 2.323207                | 1.188349  | -0.520684 |
| 13               | 1                | 0              | 3.406823                | 1.248876  | -0.520840 |
| 14               | 1                | 0              | 1.779429                | 2.029840  | -0.937428 |
| 15               | 6                | 0              | 2.452399                | -1.072835 | 0.492649  |
| 16               | 1                | 0              | 2.213306                | -1.990226 | -0.053923 |
| 17               | 1                | 0              | 3.529065                | -0.910472 | 0.416120  |
| 18               | 1                | 0              | 2.196208                | -1.250218 | 1.542037  |
| 19               | 1                | 0              | -3.689106               | -0.098812 | 0.019429  |

---

### CF<sub>3</sub> radical

Zero-point correction= 0.012690 (Hartree/Particle)  
 Thermal correction to Energy= 0.016102  
 Thermal correction to Enthalpy= 0.017046  
 Thermal correction to Gibbs Free Energy= -0.013995  
 Sum of electronic and zero-point Energies= -337.425185  
 Sum of electronic and thermal Energies= -337.421773  
 Sum of electronic and thermal Enthalpies= -337.420829  
 Sum of electronic and thermal Free Energies= -337.451870

Esol= -337.5898162

---

| Center<br>Number | Atomic<br>Number | Atomic<br>Type | Coordinates (Angstroms) |           |          |
|------------------|------------------|----------------|-------------------------|-----------|----------|
|                  |                  |                | X                       | Y         | Z        |
| 1                | 6                | 0              | 0.477950                | -0.276754 | 0.025720 |

---

|   |   |   |           |           |           |
|---|---|---|-----------|-----------|-----------|
| 2 | 9 | 0 | 0.935391  | 0.369695  | 1.078557  |
| 3 | 9 | 0 | 0.935457  | -1.511919 | -0.007741 |
| 4 | 9 | 0 | -0.838805 | -0.257324 | -0.007879 |

### CF<sub>3</sub>I

|                                              |                             |
|----------------------------------------------|-----------------------------|
| Zero-point correction=                       | 0.014644 (Hartree/Particle) |
| Thermal correction to Energy=                | 0.019359                    |
| Thermal correction to Enthalpy=              | 0.020303                    |
| Thermal correction to Gibbs Free Energy=     | -0.015577                   |
| Sum of electronic and zero-point Energies=   | -348.816993                 |
| Sum of electronic and thermal Energies=      | -348.812278                 |
| Sum of electronic and thermal Enthalpies=    | -348.811333                 |
| Sum of electronic and thermal Free Energies= | -348.847214                 |

Esol= -348.9903869

| Center Number | Atomic Number | Atomic Type | Coordinates (Angstroms) |           |           |
|---------------|---------------|-------------|-------------------------|-----------|-----------|
|               |               |             | X                       | Y         | Z         |
| 1             | 9             | 0           | 1.658316                | 0.877559  | -0.878940 |
| 2             | 9             | 0           | 1.657939                | -1.200239 | -0.320286 |
| 3             | 9             | 0           | 1.657858                | 0.322573  | 1.199425  |
| 4             | 6             | 0           | 1.204004                | -0.000016 | -0.000065 |
| 5             | 53            | 0           | -0.980963               | 0.000020  | -0.000026 |

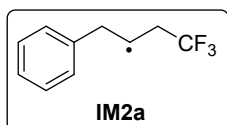

|                                              |                             |
|----------------------------------------------|-----------------------------|
| Zero-point correction=                       | 0.178985 (Hartree/Particle) |
| Thermal correction to Energy=                | 0.190864                    |
| Thermal correction to Enthalpy=              | 0.191808                    |
| Thermal correction to Gibbs Free Energy=     | 0.137628                    |
| Sum of electronic and zero-point Energies=   | -686.128050                 |
| Sum of electronic and thermal Energies=      | -686.116171                 |
| Sum of electronic and thermal Enthalpies=    | -686.115227                 |
| Sum of electronic and thermal Free Energies= | -686.169407                 |

Esol= -686.5714789

| Center Number | Atomic Number | Atomic Type | Coordinates (Angstroms) |           |           |
|---------------|---------------|-------------|-------------------------|-----------|-----------|
|               |               |             | X                       | Y         | Z         |
| 1             | 6             | 0           | 1.676626                | 0.155699  | -0.225886 |
| 2             | 6             | 0           | 3.644472                | -1.240982 | 0.005696  |
| 3             | 6             | 0           | 4.436160                | -0.110678 | 0.197438  |

|    |   |   |           |           |           |
|----|---|---|-----------|-----------|-----------|
| 4  | 6 | 0 | 3.849060  | 1.150686  | 0.179387  |
| 5  | 6 | 0 | 2.478165  | 1.280268  | -0.029735 |
| 6  | 1 | 0 | 4.094253  | -2.228802 | 0.019688  |
| 7  | 1 | 0 | 5.503741  | -0.213720 | 0.362395  |
| 8  | 1 | 0 | 4.457216  | 2.036592  | 0.332462  |
| 9  | 1 | 0 | 2.022900  | 2.267134  | -0.039185 |
| 10 | 6 | 0 | -0.630040 | -0.646525 | 0.356341  |
| 11 | 1 | 0 | -0.349668 | -0.792670 | 1.393792  |
| 12 | 6 | 0 | -1.988334 | -1.080391 | -0.083981 |
| 13 | 1 | 0 | -1.990271 | -1.380677 | -1.138431 |
| 14 | 1 | 0 | -2.357355 | -1.920729 | 0.509995  |
| 15 | 6 | 0 | -3.015920 | 0.026011  | 0.041077  |
| 16 | 9 | 0 | -3.106700 | 0.475377  | 1.300475  |
| 17 | 9 | 0 | -2.699729 | 1.077463  | -0.734822 |
| 18 | 9 | 0 | -4.236049 | -0.389129 | -0.328734 |
| 19 | 6 | 0 | 2.276078  | -1.106656 | -0.202759 |
| 20 | 1 | 0 | 1.656922  | -1.988642 | -0.347441 |
| 21 | 6 | 0 | 0.188686  | 0.289643  | -0.471779 |
| 22 | 1 | 0 | -0.114549 | 1.331669  | -0.285584 |
| 23 | 1 | 0 | -0.030607 | 0.114003  | -1.534747 |

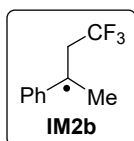

|                                              |                             |
|----------------------------------------------|-----------------------------|
| Zero-point correction=                       | 0.179520 (Hartree/Particle) |
| Thermal correction to Energy=                | 0.191298                    |
| Thermal correction to Enthalpy=              | 0.192242                    |
| Thermal correction to Gibbs Free Energy=     | 0.139897                    |
| Sum of electronic and zero-point Energies=   | -686.147436                 |
| Sum of electronic and thermal Energies=      | -686.135659                 |
| Sum of electronic and thermal Enthalpies=    | -686.134715                 |
| Sum of electronic and thermal Free Energies= | -686.187059                 |

Esol= -686.5907939

| Center Number | Atomic Number | Atomic Type | Coordinates (Angstroms) |           |           |
|---------------|---------------|-------------|-------------------------|-----------|-----------|
|               |               |             | X                       | Y         | Z         |
| 1             | 6             | 0           | -0.342742               | -1.802007 | 1.252969  |
| 2             | 6             | 0           | 0.730078                | -1.269914 | 0.557291  |
| 3             | 6             | 0           | 0.660299                | 0.021072  | -0.022974 |
| 4             | 6             | 0           | -0.556653               | 0.731540  | 0.127513  |
| 5             | 6             | 0           | -1.623267               | 0.191535  | 0.827212  |
| 6             | 6             | 0           | -1.526406               | -1.077349 | 1.398595  |
| 7             | 1             | 0           | -0.260437               | -2.796590 | 1.679701  |
| 8             | 1             | 0           | 1.621378                | -1.872756 | 0.426344  |
| 9             | 1             | 0           | -0.652069               | 1.724446  | -0.298600 |

|    |   |   |           |           |           |
|----|---|---|-----------|-----------|-----------|
| 10 | 1 | 0 | -2.539257 | 0.764578  | 0.931281  |
| 11 | 6 | 0 | 1.758553  | 0.601595  | -0.734138 |
| 12 | 6 | 0 | 3.119907  | -0.029274 | -0.729520 |
| 13 | 1 | 0 | 3.897280  | 0.740632  | -0.774478 |
| 14 | 1 | 0 | 3.303829  | -0.628478 | 0.165763  |
| 15 | 6 | 0 | 1.597677  | 1.882871  | -1.495026 |
| 16 | 1 | 0 | 1.488959  | 2.745056  | -0.822186 |
| 17 | 1 | 0 | 2.461940  | 2.066596  | -2.135442 |
| 18 | 1 | 0 | 0.708857  | 1.862023  | -2.134183 |
| 19 | 6 | 0 | 3.350736  | -0.930935 | -1.923327 |
| 20 | 9 | 0 | 2.505636  | -1.971987 | -1.931636 |
| 21 | 9 | 0 | 3.180705  | -0.269775 | -3.079258 |
| 22 | 9 | 0 | 4.597280  | -1.427095 | -1.925923 |
| 23 | 1 | 0 | -2.363483 | -1.498468 | 1.944863  |

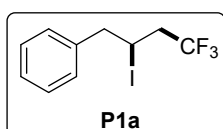

|                                              |                             |
|----------------------------------------------|-----------------------------|
| Zero-point correction=                       | 0.183347 (Hartree/Particle) |
| Thermal correction to Energy=                | 0.196436                    |
| Thermal correction to Enthalpy=              | 0.197380                    |
| Thermal correction to Gibbs Free Energy=     | 0.139570                    |
| Sum of electronic and zero-point Energies=   | -697.520842                 |
| Sum of electronic and thermal Energies=      | -697.507753                 |
| Sum of electronic and thermal Enthalpies=    | -697.506809                 |
| Sum of electronic and thermal Free Energies= | -697.564619                 |

Esol= -697.9755704

| Center Number | Atomic Number | Atomic Type | Coordinates (Angstroms) |           |           |
|---------------|---------------|-------------|-------------------------|-----------|-----------|
|               |               |             | X                       | Y         | Z         |
| 1             | 6             | 0           | -1.478966               | -1.117431 | -0.436289 |
| 2             | 6             | 0           | -3.079561               | -2.155208 | 1.056804  |
| 3             | 6             | 0           | -4.127583               | -1.577874 | 0.343202  |
| 4             | 6             | 0           | -3.852500               | -0.774179 | -0.759285 |
| 5             | 6             | 0           | -2.534478               | -0.545019 | -1.145249 |
| 6             | 1             | 0           | -3.287319               | -2.787775 | 1.913787  |
| 7             | 1             | 0           | -5.154596               | -1.756693 | 0.644333  |
| 8             | 1             | 0           | -4.664567               | -0.322662 | -1.319895 |
| 9             | 1             | 0           | -2.320054               | 0.089805  | -2.000684 |
| 10            | 6             | 0           | 0.697862                | 0.045695  | 0.154064  |
| 11            | 1             | 0           | 0.537115                | -0.290609 | 1.179166  |
| 12            | 6             | 0           | 2.191416                | 0.194046  | -0.118171 |
| 13            | 1             | 0           | 2.375710                | 0.609271  | -1.113008 |
| 14            | 1             | 0           | 2.642438                | 0.864827  | 0.616267  |
| 15            | 6             | 0           | 2.935853                | -1.121753 | -0.026288 |

|    |    |   |           |           |           |
|----|----|---|-----------|-----------|-----------|
| 16 | 9  | 0 | 2.528973  | -1.847301 | 1.028370  |
| 17 | 9  | 0 | 2.763573  | -1.884651 | -1.118556 |
| 18 | 9  | 0 | 4.251450  | -0.915992 | 0.104554  |
| 19 | 53 | 0 | -0.174805 | 2.059621  | 0.149484  |
| 20 | 6  | 0 | -1.764555 | -1.927208 | 0.665812  |
| 21 | 1  | 0 | -0.945986 | -2.387800 | 1.215419  |
| 22 | 6  | 0 | -0.042939 | -0.865978 | -0.821963 |
| 23 | 1  | 0 | 0.491381  | -1.823345 | -0.828890 |
| 24 | 1  | 0 | 0.027281  | -0.453976 | -1.834297 |

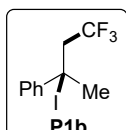

|                                              |                             |
|----------------------------------------------|-----------------------------|
| Zero-point correction=                       | 0.183160 (Hartree/Particle) |
| Thermal correction to Energy=                | 0.196101                    |
| Thermal correction to Enthalpy=              | 0.197045                    |
| Thermal correction to Gibbs Free Energy=     | 0.141384                    |
| Sum of electronic and zero-point Energies=   | -697.519338                 |
| Sum of electronic and thermal Energies=      | -697.506397                 |
| Sum of electronic and thermal Enthalpies=    | -697.505453                 |
| Sum of electronic and thermal Free Energies= | -697.561114                 |

Esol= -697.9726406

| Center Number | Atomic Number | Atomic Type | Coordinates (Angstroms) |           |           |
|---------------|---------------|-------------|-------------------------|-----------|-----------|
|               |               |             | X                       | Y         | Z         |
| 1             | 6             | 0           | 0.230860                | -1.568864 | 1.859706  |
| 2             | 6             | 0           | 1.261589                | -0.887241 | 1.230457  |
| 3             | 6             | 0           | 0.996001                | 0.138806  | 0.314034  |
| 4             | 6             | 0           | -0.336114               | 0.468019  | 0.058355  |
| 5             | 6             | 0           | -1.373522               | -0.215086 | 0.691476  |
| 6             | 1             | 0           | 0.462764                | -2.357198 | 2.568175  |
| 7             | 1             | 0           | 2.289722                | -1.134849 | 1.479863  |
| 8             | 1             | 0           | -0.583514               | 1.255195  | -0.643744 |
| 9             | 1             | 0           | -2.401173               | 0.057081  | 0.474197  |
| 10            | 6             | 0           | 3.116450                | -0.142387 | -1.051781 |
| 11            | 1             | 0           | 4.004894                | 0.385648  | -1.407143 |
| 12            | 1             | 0           | 3.443321                | -0.897383 | -0.334896 |
| 13            | 6             | 0           | 2.557791                | -0.889007 | -2.247608 |
| 14            | 9             | 0           | 1.368212                | -1.449297 | -2.005153 |
| 15            | 9             | 0           | 2.409122                | -0.088344 | -3.317349 |
| 16            | 9             | 0           | 3.402516                | -1.866431 | -2.606447 |
| 17            | 6             | 0           | -1.096455               | -1.236198 | 1.590400  |
| 18            | 6             | 0           | 2.131423                | 0.841818  | -0.402487 |
| 19            | 53            | 0           | 3.357779                | 1.901374  | 1.154337  |
| 20            | 6             | 0           | 1.686957                | 1.923297  | -1.380049 |



|    |   |   |           |           |           |
|----|---|---|-----------|-----------|-----------|
| 21 | 1 | 0 | 2.553768  | 2.376624  | -1.864140 |
| 22 | 1 | 0 | 1.056692  | 1.481269  | -2.157572 |
| 23 | 1 | 0 | 1.123885  | 2.706626  | -0.870820 |
| 24 | 1 | 0 | -1.903993 | -1.767331 | 2.083080  |

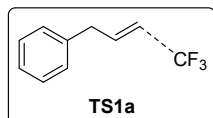

|                                              |                             |
|----------------------------------------------|-----------------------------|
| Zero-point correction=                       | 0.176224 (Hartree/Particle) |
| Thermal correction to Energy=                | 0.188720                    |
| Thermal correction to Enthalpy=              | 0.189664                    |
| Thermal correction to Gibbs Free Energy=     | 0.132612                    |
| Sum of electronic and zero-point Energies=   | -686.064497                 |
| Sum of electronic and thermal Energies=      | -686.052001                 |
| Sum of electronic and thermal Enthalpies=    | -686.051056                 |
| Sum of electronic and thermal Free Energies= | -686.108108                 |

Esol= -686.5086464

| Center Number | Atomic Number | Atomic Type | Coordinates (Angstroms) |           |           |
|---------------|---------------|-------------|-------------------------|-----------|-----------|
|               |               |             | X                       | Y         | Z         |
| 1             | 6             | 0           | -1.907655               | 1.784296  | -0.261631 |
| 2             | 6             | 0           | -0.108445               | 3.398487  | -0.089315 |
| 3             | 6             | 0           | -1.034653               | 4.434959  | 0.007208  |
| 4             | 6             | 0           | -2.395332               | 4.146590  | -0.028529 |
| 5             | 6             | 0           | -2.826514               | 2.828760  | -0.160585 |
| 6             | 1             | 0           | 0.954796                | 3.615110  | -0.059888 |
| 7             | 1             | 0           | -0.696559               | 5.460748  | 0.112288  |
| 8             | 1             | 0           | -3.124031               | 4.947237  | 0.049726  |
| 9             | 1             | 0           | -3.890276               | 2.607206  | -0.186060 |
| 10            | 6             | 0           | -1.693695               | -0.588868 | 0.534961  |
| 11            | 1             | 0           | -1.786566               | -0.351662 | 1.593085  |
| 12            | 6             | 0           | -1.058199               | -1.714691 | 0.158149  |
| 13            | 1             | 0           | -0.867195               | -1.918916 | -0.892906 |
| 14            | 1             | 0           | -0.546699               | -2.343903 | 0.879604  |
| 15            | 6             | 0           | -2.874662               | -3.205886 | -0.012636 |
| 16            | 9             | 0           | -3.383675               | -3.344523 | 1.200167  |
| 17            | 9             | 0           | -3.723621               | -2.542884 | -0.786087 |
| 18            | 9             | 0           | -2.617459               | -4.394399 | -0.539017 |
| 19            | 6             | 0           | -0.543227               | 2.084065  | -0.220781 |
| 20            | 1             | 0           | 0.178391                | 1.273839  | -0.288529 |
| 21            | 6             | 0           | -2.368527               | 0.348968  | -0.422183 |
| 22            | 1             | 0           | -2.186373               | 0.007045  | -1.448411 |
| 23            | 1             | 0           | -3.454295               | 0.302394  | -0.268676 |

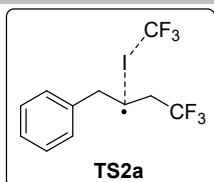

Zero-point correction= 0.195009 (Hartree/Particle)  
 Thermal correction to Energy= 0.212992  
 Thermal correction to Enthalpy= 0.213936  
 Thermal correction to Gibbs Free Energy= 0.140593  
 Sum of electronic and zero-point Energies= -1034.934480  
 Sum of electronic and thermal Energies= -1034.916497  
 Sum of electronic and thermal Enthalpies= -1034.915553  
 Sum of electronic and thermal Free Energies= -1034.988896

Esol= -1035.5549763

| Center Number | Atomic Number | Atomic Type | Coordinates (Angstroms) |           |           |
|---------------|---------------|-------------|-------------------------|-----------|-----------|
|               |               |             | X                       | Y         | Z         |
| 1             | 6             | 0           | 1.957551                | 1.542274  | 0.464003  |
| 2             | 6             | 0           | 2.850331                | 3.217347  | -1.040857 |
| 3             | 6             | 0           | 2.098614                | 4.200674  | -0.401594 |
| 4             | 6             | 0           | 1.279834                | 3.856369  | 0.669845  |
| 5             | 6             | 0           | 1.209874                | 2.533520  | 1.098677  |
| 6             | 1             | 0           | 3.495133                | 3.479586  | -1.873406 |
| 7             | 1             | 0           | 2.153249                | 5.231302  | -0.736516 |
| 8             | 1             | 0           | 0.691980                | 4.617476  | 1.172534  |
| 9             | 1             | 0           | 0.562932                | 2.264278  | 1.929201  |
| 10            | 6             | 0           | 1.199061                | -0.803873 | -0.098386 |
| 11            | 1             | 0           | 1.456848                | -0.591343 | -1.136117 |
| 12            | 6             | 0           | 1.142512                | -2.280291 | 0.218635  |
| 13            | 1             | 0           | 0.761150                | -2.457819 | 1.228639  |
| 14            | 1             | 0           | 0.491110                | -2.802154 | -0.486543 |
| 15            | 6             | 0           | 2.500815                | -2.945756 | 0.122074  |
| 16            | 9             | 0           | 3.105680                | -2.658975 | -1.040214 |
| 17            | 9             | 0           | 3.328802                | -2.556016 | 1.105973  |
| 18            | 9             | 0           | 2.386667                | -4.276156 | 0.205270  |
| 19            | 6             | 0           | 2.780704                | 1.897618  | -0.607336 |
| 20            | 1             | 0           | 3.377049                | 1.132505  | -1.100060 |
| 21            | 9             | 0           | -4.217389               | -0.658248 | -0.034732 |
| 22            | 9             | 0           | -3.809983               | 0.994778  | -1.366335 |
| 23            | 9             | 0           | -3.749533               | 1.290527  | 0.774000  |
| 24            | 6             | 0           | -3.505412               | 0.440986  | -0.207447 |
| 25            | 53            | 0           | -1.149415               | -0.129259 | -0.193332 |
| 26            | 6             | 0           | 1.879617                | 0.100475  | 0.902163  |
| 27            | 1             | 0           | 2.900399                | -0.287190 | 1.037705  |
| 28            | 1             | 0           | 1.387047                | 0.011583  | 1.877226  |

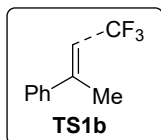

Zero-point correction= 0.176115 (Hartree/Particle)  
 Thermal correction to Energy= 0.188696  
 Thermal correction to Enthalpy= 0.189641  
 Thermal correction to Gibbs Free Energy= 0.133917  
 Sum of electronic and zero-point Energies= -686.075978  
 Sum of electronic and thermal Energies= -686.063396  
 Sum of electronic and thermal Enthalpies= -686.062452  
 Sum of electronic and thermal Free Energies= -686.118175

Esol= -686.5187649

| Center Number | Atomic Number | Atomic Type | Coordinates (Angstroms) |           |           |
|---------------|---------------|-------------|-------------------------|-----------|-----------|
|               |               |             | X                       | Y         | Z         |
| 1             | 6             | 0           | -2.200412               | -1.749248 | 0.210918  |
| 2             | 6             | 0           | -1.083375               | -0.954180 | 0.434078  |
| 3             | 6             | 0           | -1.143529               | 0.436820  | 0.261040  |
| 4             | 6             | 0           | -2.352422               | 0.997376  | -0.172767 |
| 5             | 6             | 0           | -3.471840               | 0.201602  | -0.391668 |
| 6             | 6             | 0           | -3.401975               | -1.174712 | -0.197684 |
| 7             | 1             | 0           | -2.128795               | -2.823997 | 0.343820  |
| 8             | 1             | 0           | -0.143846               | -1.419983 | 0.714439  |
| 9             | 1             | 0           | -2.425303               | 2.068939  | -0.328089 |
| 10            | 1             | 0           | -4.400833               | 0.659158  | -0.716549 |
| 11            | 6             | 0           | 0.043202                | 1.286841  | 0.506183  |
| 12            | 6             | 0           | 1.016243                | 0.906524  | 1.361154  |
| 13            | 1             | 0           | 1.870841                | 1.549236  | 1.548942  |
| 14            | 1             | 0           | 0.902640                | 0.042463  | 2.007883  |
| 15            | 6             | 0           | 0.167000                | 2.566565  | -0.275772 |
| 16            | 1             | 0           | -0.596791               | 3.292742  | 0.022824  |
| 17            | 1             | 0           | 1.143138                | 3.027454  | -0.113967 |
| 18            | 1             | 0           | 0.038447                | 2.380720  | -1.346882 |
| 19            | 6             | 0           | 2.391722                | -0.468647 | -0.140091 |
| 20            | 9             | 0           | 2.316037                | -1.736067 | 0.247925  |
| 21            | 9             | 0           | 1.830231                | -0.323777 | -1.327233 |
| 22            | 9             | 0           | 3.656631                | -0.081660 | -0.179656 |
| 23            | 1             | 0           | -4.273271               | -1.796840 | -0.374091 |

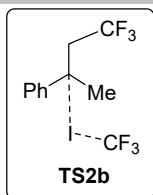

Zero-point correction= 0.195423 (Hartree/Particle)  
 Thermal correction to Energy= 0.213381  
 Thermal correction to Enthalpy= 0.214325  
 Thermal correction to Gibbs Free Energy= 0.141929  
 Sum of electronic and zero-point Energies= -1034.939524  
 Sum of electronic and thermal Energies= -1034.921566  
 Sum of electronic and thermal Enthalpies= -1034.920622  
 Sum of electronic and thermal Free Energies= -1034.993018

Esol= -1035.5590176

| Center Number | Atomic Number | Atomic Type | Coordinates (Angstroms) |           |           |
|---------------|---------------|-------------|-------------------------|-----------|-----------|
|               |               |             | X                       | Y         | Z         |
| 1             | 6             | 0           | -0.952096               | -0.344699 | 0.527234  |
| 2             | 6             | 0           | -1.292888               | -1.471818 | -0.444301 |
| 3             | 1             | 0           | -1.113448               | -1.183081 | -1.480998 |
| 4             | 1             | 0           | -0.679171               | -2.352031 | -0.236817 |
| 5             | 6             | 0           | -2.738221               | -1.925008 | -0.365148 |
| 6             | 9             | 0           | -3.018937               | -2.509566 | 0.811965  |
| 7             | 9             | 0           | -3.603413               | -0.918207 | -0.524530 |
| 8             | 9             | 0           | -2.986636               | -2.829384 | -1.322937 |
| 9             | 9             | 0           | 4.247804                | 0.797511  | -1.221085 |
| 10            | 9             | 0           | 4.395402                | -1.240539 | -0.503489 |
| 11            | 9             | 0           | 4.556415                | 0.411471  | 0.887744  |
| 12            | 6             | 0           | 3.986621                | -0.019652 | -0.219883 |
| 13            | 53            | 0           | 1.396203                | -0.064334 | 0.148653  |
| 14            | 6             | 0           | -1.561422               | 0.979291  | 0.200224  |
| 15            | 6             | 0           | -1.612506               | 1.443712  | -1.124332 |
| 16            | 6             | 0           | -2.104053               | 1.790813  | 1.203988  |
| 17            | 6             | 0           | -2.196894               | 2.661754  | -1.433047 |
| 18            | 1             | 0           | -1.162470               | 0.859598  | -1.921249 |
| 19            | 6             | 0           | -2.693501               | 3.013230  | 0.893411  |
| 20            | 1             | 0           | -2.083915               | 1.468217  | 2.238195  |
| 21            | 6             | 0           | -2.744668               | 3.453583  | -0.423581 |
| 22            | 1             | 0           | -2.220668               | 2.999483  | -2.463763 |
| 23            | 1             | 0           | -3.114436               | 3.620100  | 1.688249  |
| 24            | 6             | 0           | -1.022671               | -0.772633 | 1.981224  |
| 25            | 1             | 0           | -0.536604               | -1.740341 | 2.118018  |
| 26            | 1             | 0           | -0.536959               | -0.048144 | 2.636293  |
| 27            | 1             | 0           | -2.070676               | -0.874211 | 2.284668  |
| 28            | 1             | 0           | -3.202326               | 4.407121  | -0.664966 |

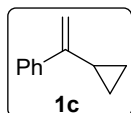

Zero-point correction= 0.198592 (Hartree/Particle)  
 Thermal correction to Energy= 0.208047  
 Thermal correction to Enthalpy= 0.208991  
 Thermal correction to Gibbs Free Energy= 0.163382  
 Sum of electronic and zero-point Energies= -425.963515  
 Sum of electronic and thermal Energies= -425.954060  
 Sum of electronic and thermal Enthalpies= -425.953116  
 Sum of electronic and thermal Free Energies= -425.998725

Esol= -426.3087399

| Center Number | Atomic Number | Atomic Type | Coordinates (Angstroms) |           |           |
|---------------|---------------|-------------|-------------------------|-----------|-----------|
|               |               |             | X                       | Y         | Z         |
| 1             | 6             | 0           | -0.929514               | 0.704771  | 0.022720  |
| 2             | 6             | 0           | -1.296222               | 1.903855  | -0.440576 |
| 3             | 1             | 0           | -2.326142               | 2.238852  | -0.396327 |
| 4             | 1             | 0           | -0.576999               | 2.581845  | -0.887370 |
| 5             | 6             | 0           | 0.495931                | 0.275039  | 0.020455  |
| 6             | 6             | 0           | 1.530546                | 1.207400  | 0.170936  |
| 7             | 6             | 0           | 0.835638                | -1.076323 | -0.118162 |
| 8             | 6             | 0           | 2.861138                | 0.806614  | 0.153932  |
| 9             | 1             | 0           | 1.283345                | 2.252542  | 0.329090  |
| 10            | 6             | 0           | 2.167696                | -1.478500 | -0.135584 |
| 11            | 1             | 0           | 0.047220                | -1.814159 | -0.226910 |
| 12            | 6             | 0           | 3.185966                | -0.539073 | -0.002935 |
| 13            | 1             | 0           | 3.647061                | 1.545089  | 0.277099  |
| 14            | 1             | 0           | 2.409989                | -2.529988 | -0.253598 |
| 15            | 1             | 0           | 4.224672                | -0.853100 | -0.011760 |
| 16            | 6             | 0           | -1.911931               | -0.291905 | 0.545825  |
| 17            | 6             | 0           | -3.383252               | -0.183022 | 0.284252  |
| 18            | 6             | 0           | -2.587104               | -1.241678 | -0.418297 |
| 19            | 1             | 0           | -1.628863               | -0.734740 | 1.497993  |
| 20            | 1             | 0           | -3.744895               | 0.646470  | -0.311570 |
| 21            | 1             | 0           | -4.053173               | -0.490542 | 1.078422  |
| 22            | 1             | 0           | -2.714377               | -2.275975 | -0.118119 |
| 23            | 1             | 0           | -2.381191               | -1.089370 | -1.472355 |

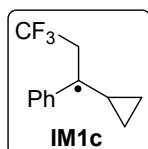

Zero-point correction= 0.214767 (Hartree/Particle)

---

Thermal correction to Energy= 0.228025  
 Thermal correction to Enthalpy= 0.228970  
 Thermal correction to Gibbs Free Energy= 0.172585  
 Sum of electronic and zero-point Energies= -763.462739  
 Sum of electronic and thermal Energies= -763.449481  
 Sum of electronic and thermal Enthalpies= -763.448537  
 Sum of electronic and thermal Free Energies= -763.504921

Esol= -763.9726054

---

| Center<br>Number | Atomic<br>Number | Atomic<br>Type | Coordinates (Angstroms) |           |           |
|------------------|------------------|----------------|-------------------------|-----------|-----------|
|                  |                  |                | X                       | Y         | Z         |
| 1                | 6                | 0              | 0.055738                | -1.810689 | 1.572716  |
| 2                | 6                | 0              | 1.041644                | -1.252929 | 0.775784  |
| 3                | 6                | 0              | 0.891123                | 0.040831  | 0.216197  |
| 4                | 6                | 0              | -0.320127               | 0.724515  | 0.492820  |
| 5                | 6                | 0              | -1.301697               | 0.156391  | 1.287703  |
| 6                | 1                | 0              | 0.202222                | -2.804282 | 1.984187  |
| 7                | 1                | 0              | 1.929238                | -1.836528 | 0.561966  |
| 8                | 1                | 0              | -0.477681               | 1.710127  | 0.070841  |
| 9                | 1                | 0              | -2.217727               | 0.706258  | 1.479548  |
| 10               | 6                | 0              | 1.905036                | 0.646943  | -0.596833 |
| 11               | 6                | 0              | 3.166934                | -0.084237 | -0.953093 |
| 12               | 1                | 0              | 3.963791                | 0.625088  | -1.191200 |
| 13               | 1                | 0              | 3.528676                | -0.733774 | -0.151776 |
| 14               | 6                | 0              | 2.998574                | -0.946273 | -2.186236 |
| 15               | 9                | 0              | 2.113385                | -1.934214 | -1.993281 |
| 16               | 9                | 0              | 2.567847                | -0.222980 | -3.231477 |
| 17               | 9                | 0              | 4.160357                | -1.515300 | -2.543282 |
| 18               | 6                | 0              | -1.122208               | -1.112342 | 1.839932  |
| 19               | 1                | 0              | -1.892179               | -1.553845 | 2.463562  |
| 20               | 6                | 0              | 1.669468                | 1.959680  | -1.258307 |
| 21               | 6                | 0              | 1.535371                | 3.221969  | -0.443556 |
| 22               | 6                | 0              | 2.749242                | 3.003887  | -1.296528 |
| 23               | 1                | 0              | 1.037055                | 1.915613  | -2.145722 |
| 24               | 1                | 0              | 1.656249                | 3.127021  | 0.630308  |
| 25               | 1                | 0              | 0.805449                | 3.960135  | -0.757398 |
| 26               | 1                | 0              | 2.860149                | 3.590911  | -2.200521 |
| 27               | 1                | 0              | 3.679875                | 2.790005  | -0.780346 |

---

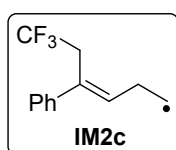

Zero-point correction= 0.212162 (Hartree/Particle)  
 Thermal correction to Energy= 0.226448

---

Thermal correction to Enthalpy= 0.227392  
 Thermal correction to Gibbs Free Energy= 0.169211  
 Sum of electronic and zero-point Energies= -763.449243  
 Sum of electronic and thermal Energies= -763.434956  
 Sum of electronic and thermal Enthalpies= -763.434012  
 Sum of electronic and thermal Free Energies= -763.492193

Esol= -763.9573374

---

| Center Number | Atomic Number | Atomic Type | Coordinates (Angstroms) |           |           |
|---------------|---------------|-------------|-------------------------|-----------|-----------|
|               |               |             | X                       | Y         | Z         |
| 1             | 6             | 0           | -0.122338               | -2.517987 | 0.778292  |
| 2             | 6             | 0           | 0.836993                | -1.817498 | 0.053835  |
| 3             | 6             | 0           | 0.751604                | -0.426923 | -0.091349 |
| 4             | 6             | 0           | -0.311198               | 0.240287  | 0.532433  |
| 5             | 6             | 0           | -1.270778               | -0.460097 | 1.254227  |
| 6             | 1             | 0           | -0.042173               | -3.596547 | 0.868959  |
| 7             | 1             | 0           | 1.644600                | -2.360467 | -0.424670 |
| 8             | 1             | 0           | -0.364983               | 1.322878  | 0.471873  |
| 9             | 1             | 0           | -2.081542               | 0.079001  | 1.733882  |
| 10            | 6             | 0           | 1.764305                | 0.336377  | -0.869791 |
| 11            | 6             | 0           | 3.203649                | -0.131380 | -0.794938 |
| 12            | 1             | 0           | 3.888544                | 0.712403  | -0.673071 |
| 13            | 1             | 0           | 3.354230                | -0.796123 | 0.059126  |
| 14            | 6             | 0           | 3.668749                | -0.881247 | -2.022065 |
| 15            | 9             | 0           | 2.936930                | -1.983280 | -2.254236 |
| 16            | 9             | 0           | 3.604334                | -0.130344 | -3.131519 |
| 17            | 9             | 0           | 4.943862                | -1.275165 | -1.882305 |
| 18            | 6             | 0           | -1.181694               | -1.844190 | 1.378954  |
| 19            | 1             | 0           | -1.926761               | -2.391428 | 1.947076  |
| 20            | 6             | 0           | 1.401022                | 1.404937  | -1.594853 |
| 21            | 6             | 0           | 2.014885                | 3.769858  | -1.935866 |
| 22            | 6             | 0           | 2.290494                | 2.360685  | -2.355043 |
| 23            | 1             | 0           | 0.340573                | 1.649143  | -1.634546 |
| 24            | 1             | 0           | 2.359475                | 4.120352  | -0.970859 |
| 25            | 1             | 0           | 1.288604                | 4.375447  | -2.462676 |
| 26            | 1             | 0           | 2.104335                | 2.240894  | -3.428667 |
| 27            | 1             | 0           | 3.344373                | 2.112635  | -2.199531 |

---

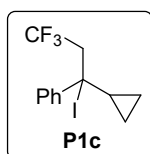

Zero-point correction= 0.217589 (Hartree/Particle)  
 Thermal correction to Energy= 0.232322  
 Thermal correction to Enthalpy= 0.233266

Thermal correction to Gibbs Free Energy= 0.173264  
 Sum of electronic and zero-point Energies= -774.840750  
 Sum of electronic and thermal Energies= -774.826017  
 Sum of electronic and thermal Enthalpies= -774.825073  
 Sum of electronic and thermal Free Energies= -774.885075

Esol= -775.3536981

| Center Number | Atomic Number | Atomic Type | Coordinates (Angstroms) |           |           |
|---------------|---------------|-------------|-------------------------|-----------|-----------|
|               |               |             | X                       | Y         | Z         |
| 1             | 6             | 0           | 0.167382                | -1.720401 | 1.703898  |
| 2             | 6             | 0           | 1.221076                | -1.047279 | 1.102028  |
| 3             | 6             | 0           | 1.000767                | 0.122584  | 0.364186  |
| 4             | 6             | 0           | -0.305149               | 0.608430  | 0.267195  |
| 5             | 6             | 0           | -1.363213               | -0.066200 | 0.872031  |
| 6             | 1             | 0           | 0.363259                | -2.625212 | 2.269774  |
| 7             | 1             | 0           | 2.228908                | -1.428391 | 1.234954  |
| 8             | 1             | 0           | -0.501446               | 1.522565  | -0.280468 |
| 9             | 1             | 0           | -2.369838               | 0.328572  | 0.780373  |
| 10            | 6             | 0           | 3.178516                | -0.082986 | -0.964013 |
| 11            | 1             | 0           | 4.054190                | 0.491458  | -1.274569 |
| 12            | 1             | 0           | 3.516199                | -0.853948 | -0.270966 |
| 13            | 6             | 0           | 2.676594                | -0.793884 | -2.207337 |
| 14            | 9             | 0           | 1.453603                | -1.315624 | -2.053177 |
| 15            | 9             | 0           | 2.625318                | 0.022782  | -3.272768 |
| 16            | 9             | 0           | 3.509113                | -1.796053 | -2.525178 |
| 17            | 6             | 0           | -1.133843               | -1.234388 | 1.588030  |
| 18            | 6             | 0           | 2.147553                | 0.852062  | -0.309377 |
| 19            | 53            | 0           | 3.314969                | 1.834653  | 1.346849  |
| 20            | 1             | 0           | -1.957963               | -1.760363 | 2.058424  |
| 21            | 6             | 0           | 1.680576                | 1.883082  | -1.320172 |
| 22            | 6             | 0           | 1.328497                | 3.311314  | -1.037825 |
| 23            | 6             | 0           | 2.549314                | 2.978409  | -1.852414 |
| 24            | 1             | 0           | 1.050485                | 1.398415  | -2.064329 |
| 25            | 1             | 0           | 1.485625                | 3.687264  | -0.033267 |
| 26            | 1             | 0           | 0.464294                | 3.720719  | -1.549294 |
| 27            | 1             | 0           | 2.528107                | 3.157741  | -2.920772 |
| 28            | 1             | 0           | 3.512905                | 3.139476  | -1.379889 |

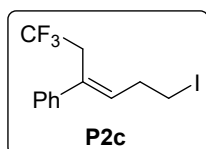

Zero-point correction= 0.217693 (Hartree/Particle)  
 Thermal correction to Energy= 0.232864  
 Thermal correction to Enthalpy= 0.233808



Thermal correction to Gibbs Free Energy= 0.171315  
 Sum of electronic and zero-point Energies= -774.853278  
 Sum of electronic and thermal Energies= -774.838108  
 Sum of electronic and thermal Enthalpies= -774.837164  
 Sum of electronic and thermal Free Energies= -774.899656

Esol= -775.3679157

| Center Number | Atomic Number | Atomic Type | Coordinates (Angstroms) |           |           |
|---------------|---------------|-------------|-------------------------|-----------|-----------|
|               |               |             | X                       | Y         | Z         |
| 1             | 6             | 0           | -0.296595               | -1.824228 | 1.062293  |
| 2             | 6             | 0           | 0.711305                | -1.260724 | 0.286326  |
| 3             | 6             | 0           | 0.775877                | 0.125017  | 0.094005  |
| 4             | 6             | 0           | -0.184514               | 0.928531  | 0.722724  |
| 5             | 6             | 0           | -1.191827               | 0.365044  | 1.497195  |
| 6             | 1             | 0           | -0.334952               | -2.901302 | 1.189383  |
| 7             | 1             | 0           | 1.437299                | -1.906537 | -0.194969 |
| 8             | 1             | 0           | -0.119728               | 2.007820  | 0.624899  |
| 9             | 1             | 0           | -1.921018               | 1.007345  | 1.980443  |
| 10            | 6             | 0           | 3.222876                | 0.122014  | -0.687302 |
| 11            | 1             | 0           | 3.999587                | 0.888537  | -0.617539 |
| 12            | 1             | 0           | 3.326146                | -0.524084 | 0.187571  |
| 13            | 6             | 0           | 3.561160                | -0.717920 | -1.898389 |
| 14            | 9             | 0           | 2.702529                | -1.736739 | -2.066346 |
| 15            | 9             | 0           | 3.543012                | -0.002242 | -3.032159 |
| 16            | 9             | 0           | 4.787079                | -1.246952 | -1.779487 |
| 17            | 6             | 0           | -1.253464               | -1.015531 | 1.668517  |
| 18            | 6             | 0           | 1.841707                | 0.743471  | -0.740051 |
| 19            | 1             | 0           | -2.035901               | -1.456306 | 2.277386  |
| 20            | 6             | 0           | 1.574828                | 1.818205  | -1.496960 |
| 21            | 6             | 0           | 2.535945                | 2.623078  | -2.326136 |
| 22            | 1             | 0           | 0.543532                | 2.169198  | -1.520421 |
| 23            | 1             | 0           | 2.307342                | 2.496176  | -3.390458 |
| 24            | 1             | 0           | 3.568049                | 2.294326  | -2.191972 |
| 25            | 6             | 0           | 2.403037                | 4.092243  | -1.946995 |
| 26            | 1             | 0           | 1.399569                | 4.476755  | -2.126779 |
| 27            | 1             | 0           | 2.681339                | 4.274676  | -0.909904 |
| 28            | 53            | 0           | 3.720165                | 5.358621  | -3.131836 |

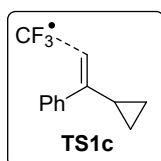

Zero-point correction= 0.176115 (Hartree/Particle)  
 Thermal correction to Energy= 0.188696  
 Thermal correction to Enthalpy= 0.189641

---

Thermal correction to Gibbs Free Energy= 0.133917  
 Sum of electronic and zero-point Energies= -686.075978  
 Sum of electronic and thermal Energies= -686.063396  
 Sum of electronic and thermal Enthalpies= -686.062452  
 Sum of electronic and thermal Free Energies= -686.118175

Esol= -686.5187649

---

| Center<br>Number | Atomic<br>Number | Atomic<br>Type | Coordinates (Angstroms) |           |           |
|------------------|------------------|----------------|-------------------------|-----------|-----------|
|                  |                  |                | X                       | Y         | Z         |
| 1                | 6                | 0              | -2.047078               | -1.266422 | 0.350447  |
| 2                | 6                | 0              | -0.815120               | -0.646921 | 0.518388  |
| 3                | 6                | 0              | -0.664383               | 0.729334  | 0.291141  |
| 4                | 6                | 0              | -1.783379               | 1.454724  | -0.139544 |
| 5                | 6                | 0              | -3.017683               | 0.835050  | -0.303154 |
| 6                | 6                | 0              | -3.156003               | -0.527455 | -0.055771 |
| 7                | 1                | 0              | -2.138737               | -2.333712 | 0.524711  |
| 8                | 1                | 0              | 0.048372                | -1.242505 | 0.797587  |
| 9                | 1                | 0              | -1.694059               | 2.518251  | -0.336053 |
| 10               | 1                | 0              | -3.873232               | 1.419240  | -0.626716 |
| 11               | 6                | 0              | 0.645480                | 1.393059  | 0.477398  |
| 12               | 6                | 0              | 1.570616                | 0.897518  | 1.326508  |
| 13               | 1                | 0              | 2.518908                | 1.406089  | 1.470656  |
| 14               | 1                | 0              | 1.342279                | 0.085635  | 2.009497  |
| 15               | 6                | 0              | 0.944452                | 2.608792  | -0.357516 |
| 16               | 1                | 0              | 0.310194                | 3.455136  | -0.072408 |
| 17               | 1                | 0              | 1.984016                | 2.918048  | -0.234576 |
| 18               | 1                | 0              | 0.760185                | 2.406415  | -1.417436 |
| 19               | 6                | 0              | 2.676681                | -0.728165 | -0.146770 |
| 20               | 9                | 0              | 2.416605                | -1.953523 | 0.293114  |
| 21               | 9                | 0              | 2.112786                | -0.541032 | -1.326843 |
| 22               | 9                | 0              | 3.984659                | -0.544023 | -0.228036 |
| 23               | 1                | 0              | -4.117304               | -1.012700 | -0.189025 |

---

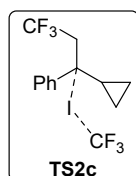

Zero-point correction= 0.229991 (Hartree/Particle)  
 Thermal correction to Energy= 0.249654  
 Thermal correction to Enthalpy= 0.250598  
 Thermal correction to Gibbs Free Energy= 0.174326  
 Sum of electronic and zero-point Energies= -1112.261057  
 Sum of electronic and thermal Energies= -1112.241394  
 Sum of electronic and thermal Enthalpies= -1112.240449  
 Sum of electronic and thermal Free Energies= -1112.316722

Esol= -1112.9401383

| Center<br>Number | Atomic<br>Number | Atomic<br>Type | Coordinates (Angstroms) |           |           |
|------------------|------------------|----------------|-------------------------|-----------|-----------|
|                  |                  |                | X                       | Y         | Z         |
| 1                | 6                | 0              | -0.970257               | -0.283082 | 0.247008  |
| 2                | 6                | 0              | -1.280275               | -1.151819 | -0.971813 |
| 3                | 1                | 0              | -1.029471               | -0.652527 | -1.908435 |
| 4                | 1                | 0              | -0.693093               | -2.071931 | -0.924472 |
| 5                | 6                | 0              | -2.731134               | -1.584150 | -1.074956 |
| 6                | 9                | 0              | -3.069643               | -2.459385 | -0.114709 |
| 7                | 9                | 0              | -3.586862               | -0.558039 | -0.993264 |
| 8                | 9                | 0              | -2.940069               | -2.192488 | -2.251808 |
| 9                | 9                | 0              | 4.573279                | 0.405848  | 0.751830  |
| 10               | 9                | 0              | 4.274252                | 0.967126  | -1.319170 |
| 11               | 9                | 0              | 4.400190                | -1.124663 | -0.770993 |
| 12               | 6                | 0              | 4.002541                | 0.072948  | -0.389046 |
| 13               | 53               | 0              | 1.395974                | 0.031260  | -0.038653 |
| 14               | 6                | 0              | -1.506344               | 1.110902  | 0.228749  |
| 15               | 6                | 0              | -1.746460               | 1.797088  | -0.971905 |
| 16               | 6                | 0              | -1.761475               | 1.779844  | 1.434433  |
| 17               | 6                | 0              | -2.237622               | 3.094592  | -0.965750 |
| 18               | 1                | 0              | -1.543930               | 1.322395  | -1.925674 |
| 19               | 6                | 0              | -2.254380               | 3.079531  | 1.439350  |
| 20               | 1                | 0              | -1.568210               | 1.277279  | 2.375101  |
| 21               | 6                | 0              | -2.496272               | 3.742987  | 0.240495  |
| 22               | 1                | 0              | -2.418806               | 3.602660  | -1.907091 |
| 23               | 1                | 0              | -2.447803               | 3.575113  | 2.385049  |
| 24               | 1                | 0              | -2.879685               | 4.757920  | 0.243776  |
| 25               | 6                | 0              | -1.218789               | -1.035035 | 1.533569  |
| 26               | 6                | 0              | -0.460928               | -2.262661 | 1.930969  |
| 27               | 6                | 0              | -0.363648               | -1.015821 | 2.766539  |
| 28               | 1                | 0              | -2.290052               | -1.074430 | 1.731442  |
| 29               | 1                | 0              | 0.414143                | -2.528565 | 1.346429  |
| 30               | 1                | 0              | -1.028454               | -3.102984 | 2.312745  |
| 31               | 1                | 0              | -0.875188               | -0.997730 | 3.722595  |
| 32               | 1                | 0              | 0.568280                | -0.463211 | 2.735374  |

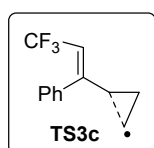

Zero-point correction= 0.212306 (Hartree/Particle)  
Thermal correction to Energy= 0.225491  
Thermal correction to Enthalpy= 0.226435  
Thermal correction to Gibbs Free Energy= 0.171174

---

Sum of electronic and zero-point Energies= -763.445327  
 Sum of electronic and thermal Energies= -763.432141  
 Sum of electronic and thermal Enthalpies= -763.431197  
 Sum of electronic and thermal Free Energies= -763.486458

Esol= -763.9467537

---

| Center Number | Atomic Number | Atomic Type | Coordinates (Angstroms) |           |           |
|---------------|---------------|-------------|-------------------------|-----------|-----------|
|               |               |             | X                       | Y         | Z         |
| 1             | 6             | 0           | -3.002315               | -1.582522 | 0.061317  |
| 2             | 6             | 0           | -1.663207               | -1.213430 | 0.109969  |
| 3             | 6             | 0           | -1.283298               | 0.137869  | 0.050607  |
| 4             | 6             | 0           | -2.302925               | 1.101661  | -0.039564 |
| 5             | 6             | 0           | -3.639675               | 0.729737  | -0.092911 |
| 6             | 1             | 0           | -3.267703               | -2.634383 | 0.098830  |
| 7             | 1             | 0           | -0.901611               | -1.983896 | 0.160510  |
| 8             | 1             | 0           | -2.038697               | 2.154579  | -0.026823 |
| 9             | 1             | 0           | -4.406805               | 1.495365  | -0.154418 |
| 10            | 6             | 0           | 1.104840                | -0.307492 | 0.874860  |
| 11            | 1             | 0           | 1.795071                | 0.309529  | 1.460988  |
| 12            | 1             | 0           | 0.582138                | -0.957916 | 1.580740  |
| 13            | 6             | 0           | 1.968283                | -1.203117 | 0.014208  |
| 14            | 9             | 0           | 1.238322                | -2.050487 | -0.727523 |
| 15            | 9             | 0           | 2.738494                | -0.503981 | -0.834393 |
| 16            | 9             | 0           | 2.790403                | -1.946616 | 0.772196  |
| 17            | 6             | 0           | -3.998586               | -0.615604 | -0.044596 |
| 18            | 6             | 0           | 0.130048                | 0.543577  | 0.097570  |
| 19            | 1             | 0           | -5.043310               | -0.906009 | -0.080734 |
| 20            | 6             | 0           | 0.542323                | 1.707042  | -0.509910 |
| 21            | 6             | 0           | 1.228779                | 3.203769  | 0.635227  |
| 22            | 6             | 0           | 1.881134                | 2.362823  | -0.392333 |
| 23            | 1             | 0           | -0.165636               | 2.219060  | -1.154140 |
| 24            | 1             | 0           | 1.211776                | 2.887038  | 1.669348  |
| 25            | 1             | 0           | 0.717165                | 4.118492  | 0.368823  |
| 26            | 1             | 0           | 2.191456                | 2.889671  | -1.293693 |
| 27            | 1             | 0           | 2.679653                | 1.717575  | -0.034033 |

---

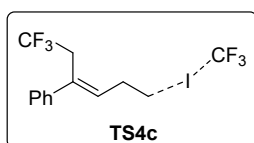

Zero-point correction= 0.229173 (Hartree/Particle)  
 Thermal correction to Energy= 0.249224  
 Thermal correction to Enthalpy= 0.250168  
 Thermal correction to Gibbs Free Energy= 0.172212

---

Sum of electronic and zero-point Energies= -1112.264259  
Sum of electronic and thermal Energies= -1112.244208  
Sum of electronic and thermal Enthalpies= -1112.243264  
Sum of electronic and thermal Free Energies= -1112.321220

Esol= -1112.9440127

---

| Center<br>Number | Atomic<br>Number | Atomic<br>Type | Coordinates (Angstroms) |           |           |
|------------------|------------------|----------------|-------------------------|-----------|-----------|
|                  |                  |                | X                       | Y         | Z         |
| 1                | 6                | 0              | 6.384055                | -0.700044 | -0.058792 |
| 2                | 6                | 0              | 5.149768                | -0.063496 | -0.140980 |
| 3                | 6                | 0              | 3.964398                | -0.765918 | 0.110955  |
| 4                | 6                | 0              | 4.057079                | -2.116812 | 0.472571  |
| 5                | 6                | 0              | 5.290381                | -2.752452 | 0.553439  |
| 6                | 1                | 0              | 7.289532                | -0.139964 | -0.268738 |
| 7                | 1                | 0              | 5.107681                | 0.980979  | -0.428775 |
| 8                | 1                | 0              | 3.152490                | -2.662796 | 0.721914  |
| 9                | 1                | 0              | 5.338294                | -3.797518 | 0.842054  |
| 10               | 6                | 0              | 2.536179                | 1.341334  | 0.463405  |
| 11               | 1                | 0              | 1.638236                | 1.512353  | 1.063399  |
| 12               | 1                | 0              | 3.394018                | 1.618710  | 1.080406  |
| 13               | 6                | 0              | 2.479112                | 2.329155  | -0.681013 |
| 14               | 9                | 0              | 3.564491                | 2.258948  | -1.468421 |
| 15               | 9                | 0              | 1.412937                | 2.130688  | -1.469832 |
| 16               | 9                | 0              | 2.404595                | 3.584550  | -0.217207 |
| 17               | 6                | 0              | 6.460350                | -2.046529 | 0.285211  |
| 18               | 6                | 0              | 2.634907                | -0.104872 | 0.020986  |
| 19               | 1                | 0              | 7.424311                | -2.539805 | 0.353376  |
| 20               | 6                | 0              | 1.568123                | -0.784695 | -0.428230 |
| 21               | 6                | 0              | 0.133742                | -0.322809 | -0.472529 |
| 22               | 1                | 0              | 1.729561                | -1.803957 | -0.775294 |
| 23               | 1                | 0              | -0.248396               | -0.391601 | -1.496665 |
| 24               | 1                | 0              | 0.030492                | 0.718534  | -0.165937 |
| 25               | 6                | 0              | -0.656675               | -1.224171 | 0.441038  |
| 26               | 1                | 0              | -0.763672               | -2.260754 | 0.128554  |
| 27               | 1                | 0              | -0.467042               | -1.109971 | 1.505927  |
| 28               | 53               | 0              | -3.022094               | -0.509055 | 0.347784  |
| 29               | 6                | 0              | -5.285550               | 0.211284  | 0.230740  |
| 30               | 9                | 0              | -5.326766               | 1.532194  | 0.258513  |
| 31               | 9                | 0              | -5.829519               | -0.225112 | -0.892133 |
| 32               | 9                | 0              | -5.952790               | -0.274136 | 1.263671  |

---

---

## 8 References

- [1].(a) R. Liu, Z. Lu, X. H. Hu, J. L. Li and X. Yang, *Org. Lett.*, **2015**, *17*, 1489; (b) Q. Y. Meng, T. E. Schirmer, K. Katou, and B. Kçnig, *Angew. Chem. Int. Ed.*, **2019**, *58*, 5723–5728; (c) Z. Li, D. Wu, C. Ding, G. Yin, *CCS Chem.*, **2020**, *2*, 576–582.
- [2].(a) S. Fang, X. Wang, F. Yin, P. Cai, H. Yang and L. Kong, *Org. Lett.*, **2019**, *21*, 841; (b) M. O. Akram, P. S. Mali, and N. T. Patil, *Org. Lett.*, **2017**, *19*, 3075–3078; (c) Z. Shu, Y. Zhou, Y. Zhang and J. Wang, *Org. Chem. Front.*, **2014**, *1*, 1123–1127.
- [3].I. Buslov, S. C. Keller and X. Hu, *Org. Lett.*, **2016**, *18*, 1928–1931.
- [4].X. Qi, P. Chen, and G. Liu, *Angew. Chem. Int. Ed.*, **2017**, *56*, 9517–9521.
- [5].K. Tsuchii, M. Imura, N. Kamada, T. Hirao and A. Ogawa., *J. Org. Chem.*, **2004**, *69*, 6658–6665.
- [6].(a) Y. Chen, L. Li, X. He, Z. Li, *ACS Catal.*, **2019**, *9*, 9098-9102; (b) W. Li, X. Zhou, T. Xiao, Z. Ke and L. Zhou, *CCS Chem.*, **2021**, *3*, 794–805; (c) J. Ignatowska, W. Dmowski, *Journal of Fluorine Chemistry*, **2007**, *128*, 997–1006.
- [7].Y. Cheng, C. Mgck-Lichtenfeld and A. Studer, *Angew. Chem. Int. Ed.*, **2018**, *57*, 16832–16836.
- [8].(a) L. Tang, F. Yang, Z. Yang, H. Chen, H. Cheng, S. Zhang, Q. Zhou, and W. Rao, *Org. Lett.* **2021**, *23*, 519–524; (b) L. Helmecke, M. Spittler, K. Baumgarten, and C. Czekelius, *Org. Lett.*, **2019**, *21*, 7823–7827.
- [9].(a) E. Zhu, X. Liu, A. Wang, T. Mao, L. Zhao, X. Zhang and C. He, *Chem. Commun.*, **2019**, *55*, 12259–12262; (b) T. Mao, M. J. Ma, L. Zhao, D. P. Xue, Y. B. Yu, J. G. and C. Y. He, *Chem. Commun.*, **2020**, *56*, 1815-1818; (c) J. Ignatowska, W. Dmowski, *Journal of Fluorine Chemistry*, **2007**, *128*, 997–1006; (d) O. F. Aebischer, D. T. Muñoz, P. Tondo, J. L. Débieux, T. A. Jenny, *Synthesis*, **2010**, *7*, 1123-1140.
- [10].Gaussian 16, Revision A.03, M. J. Frisch, G. W. Trucks, H. B. Schlegel, G. E. Scuseria, M. A. Robb, J. R. Cheeseman, G. Scalmani, V. Barone, G. A. Petersson, H. Nakatsuji, X. Li, M. Caricato, A. V. Marenich, J. Bloino, B. G. Janesko, R. Gomperts, B. Mennucci, H. P. Hratchian, J. V. Ortiz, A. F. Izmaylov, J. L. Sonnenberg, D. Williams-Young, F. Ding, F. Lipparini, F. Egidi, J. Goings, B. Peng, A. Petrone, T. Henderson, D. Ranasinghe, V. G. Zakrzewski, J. Gao, N. Rega, G. Zheng, W. Liang, M. Hada, M. Ehara, K. Toyota, R. Fukuda, J. Hasegawa, M. Ishida, T. Nakajima, Y. Honda, O. Kitao, H. Nakai, T. Vreven, K. Throssell, J. A. Montgomery, Jr., J. E. Peralta, F. Ogliaro, M. J. Bearpark, J. J. Heyd, E. N. Brothers, K. N. Kudin, V. N. Staroverov, T. A. Keith, R. Kobayashi, J. Normand, K. Raghavachari, A. P. Rendell, J. C. Burant, S. S. Iyengar, J. Tomasi, M. Cossi, J. M. Millam, M. Klene, C. Adamo, R. Cammi, J. W. Ochterski, R. L. Martin, K. Morokuma, O. Farkas, J. B. Foresman, and D. J. Fox, Gaussian, Inc., Wallingford CT, 2016.
- [11].a) Y. Zhao, N. E. Schultz, D. G. Truhlar, *J. Chem. Theory. Comput.*, **2006**, *2*, 364; b) Y. Zhao, D. G. Truhlar, *J. Chem. Phys.* **2006**, *125*, 194101; c) Y. Zhao, D. G. Truhlar, *J. Phys. Chem. A* **2006**, *110*, 13126.
- [12].C. Gonzalez, H. B. Schlegel, *J. Chem. Phys.*, **1989**, *90*, 2154.

---

[13].J. Tomasi, M. Persico, *Chem. Rev.*, **1994**, *94*, 2027.

[14].CYLview, 1.0 b; C. Y. Legault, Université de Sherbrooke, 2009 (<http://www.cylview.org>).
